# Supplementary material
Source: publisher figshare collection journal article supplement (https://plos.figshare.com/articles/dataset/_/7111907)

Venn Diagram

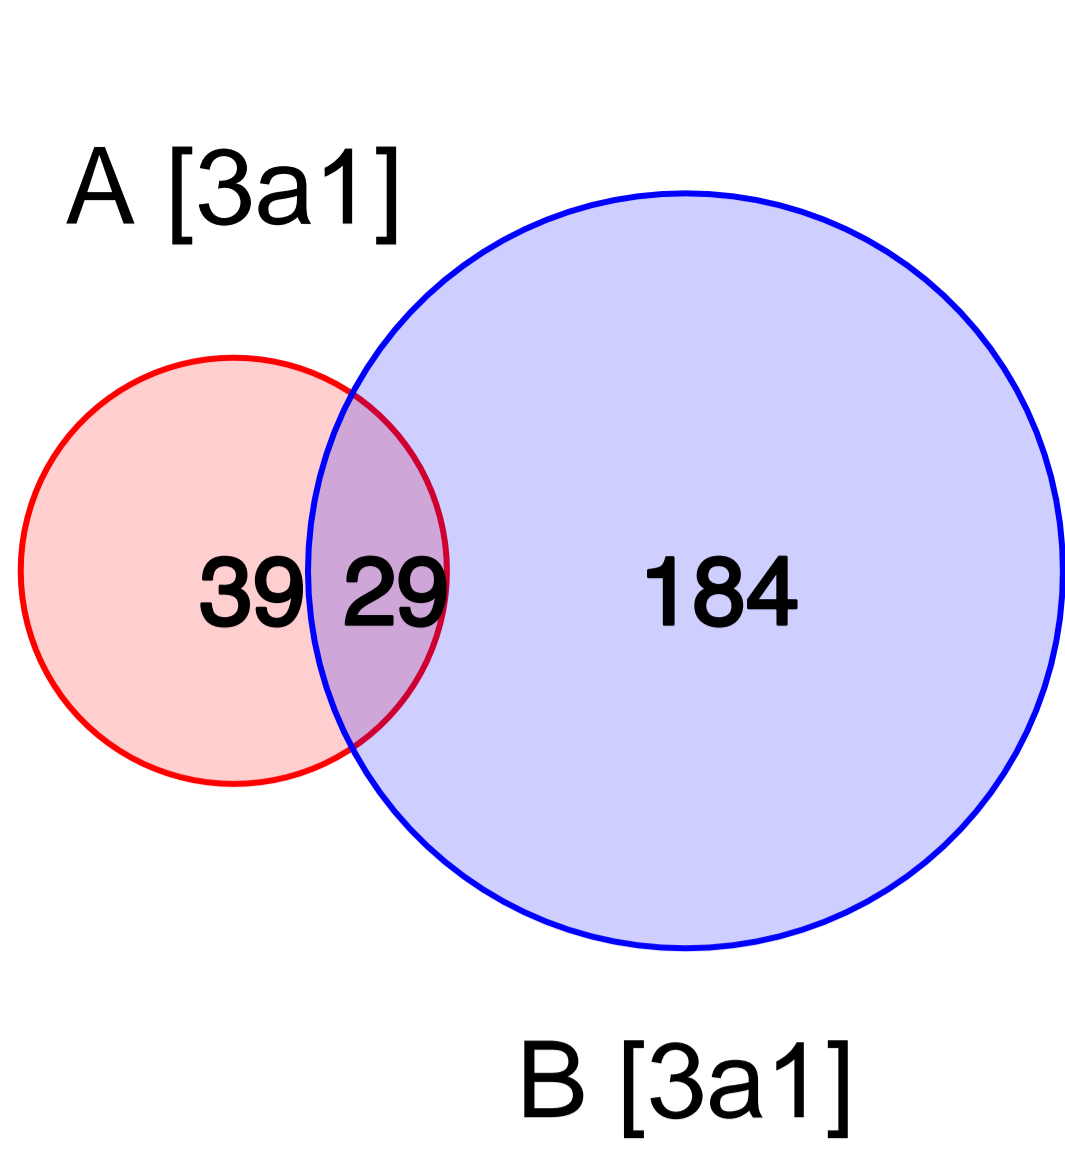

Venn Diagram

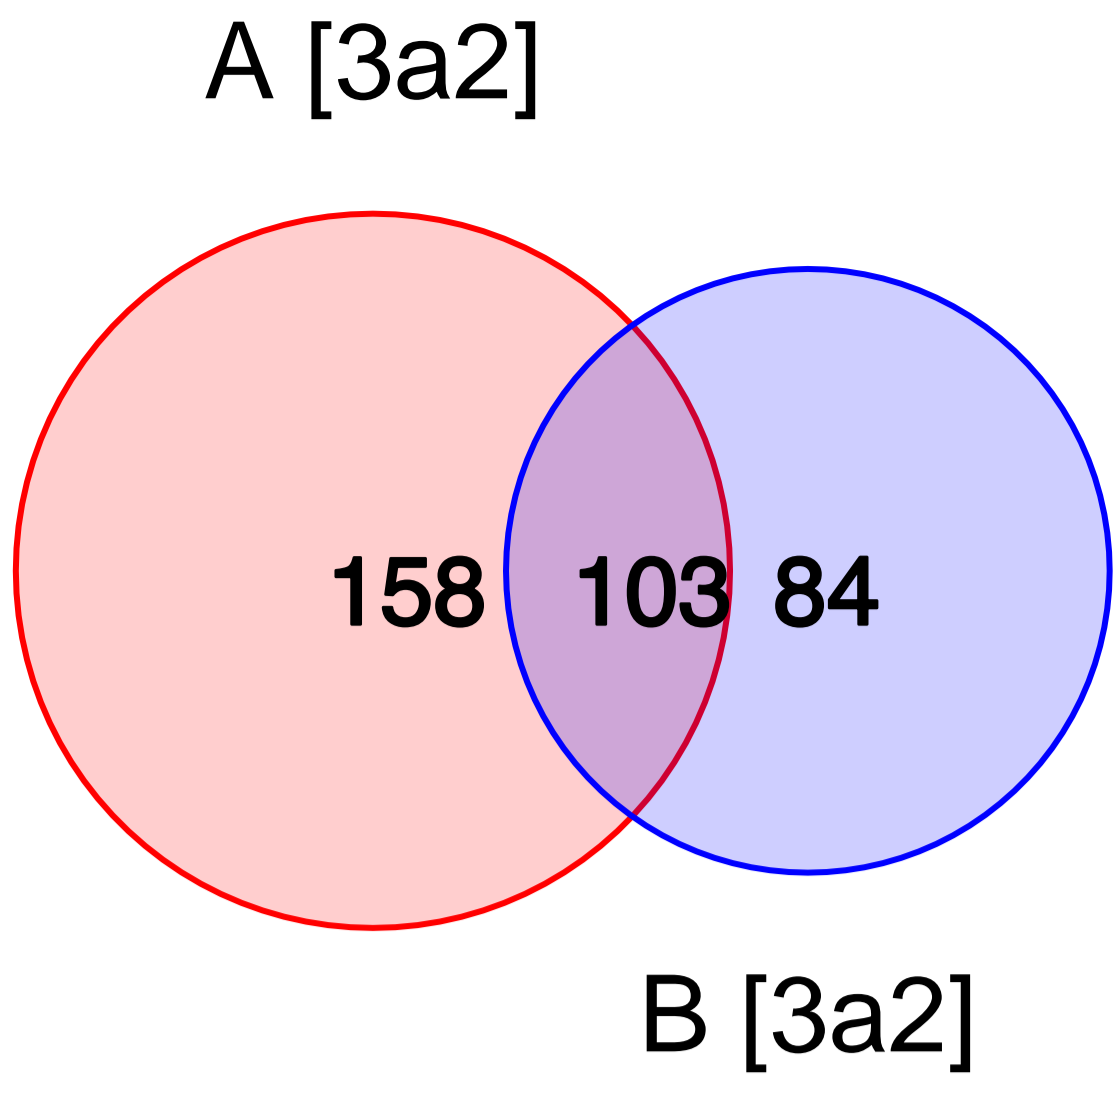

Venn Diagram

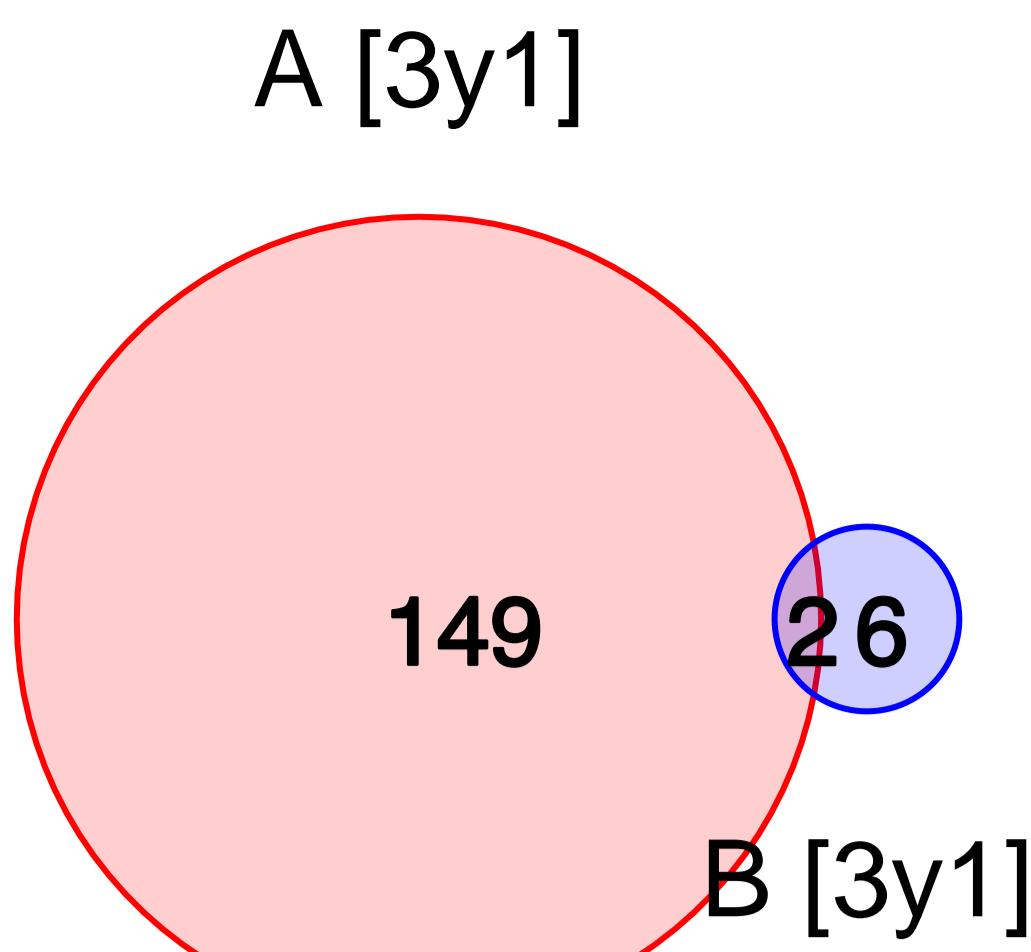

Venn Diagram

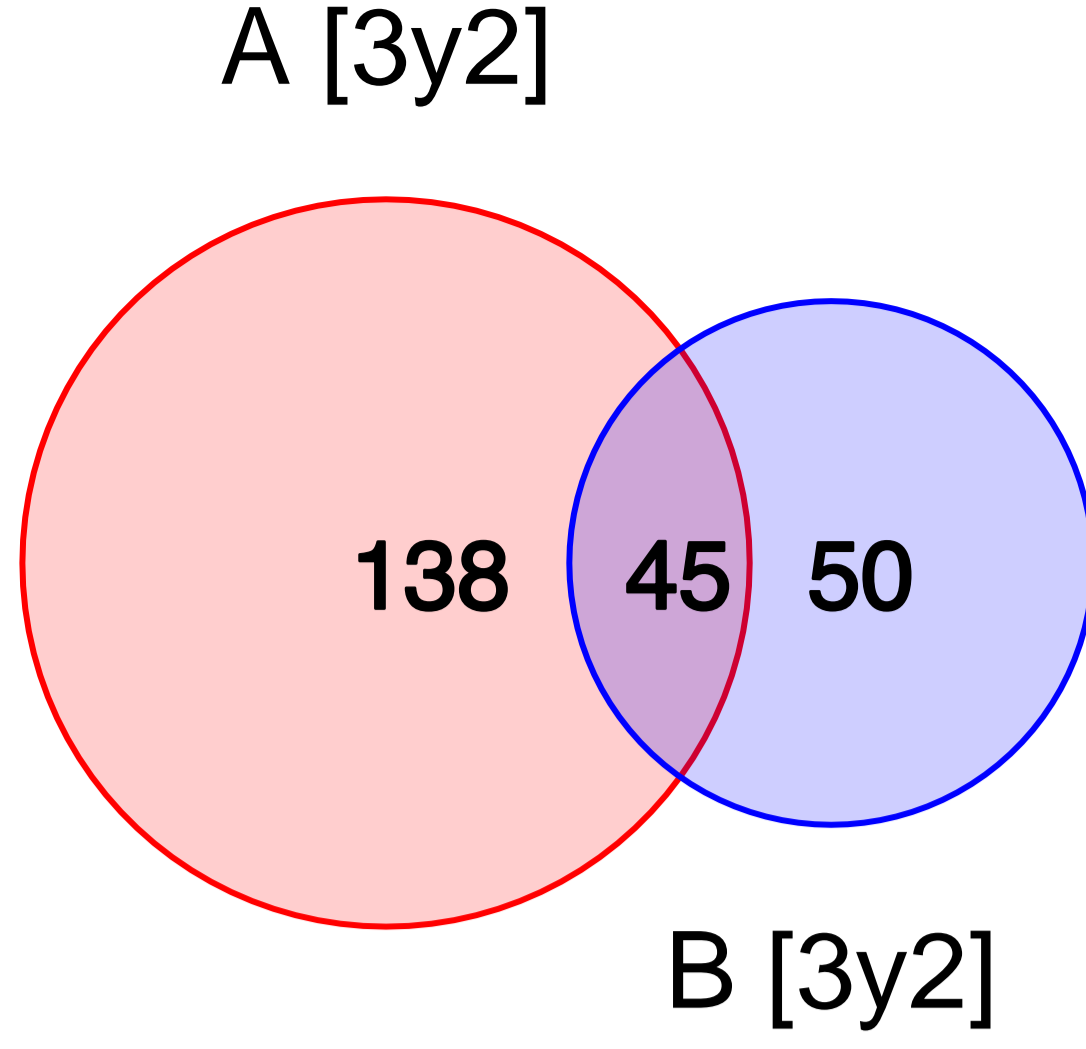

Venn Diagram

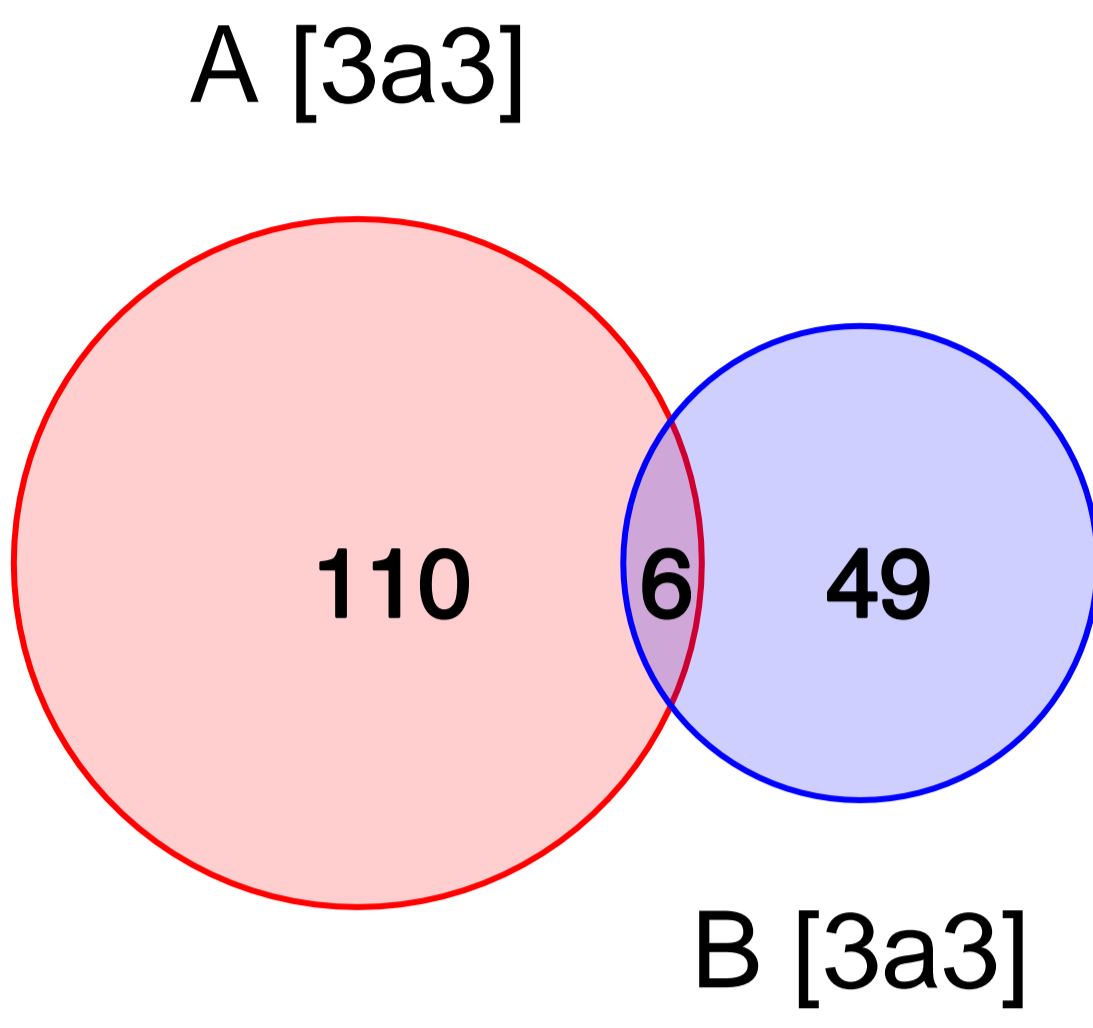

Venn Diagram

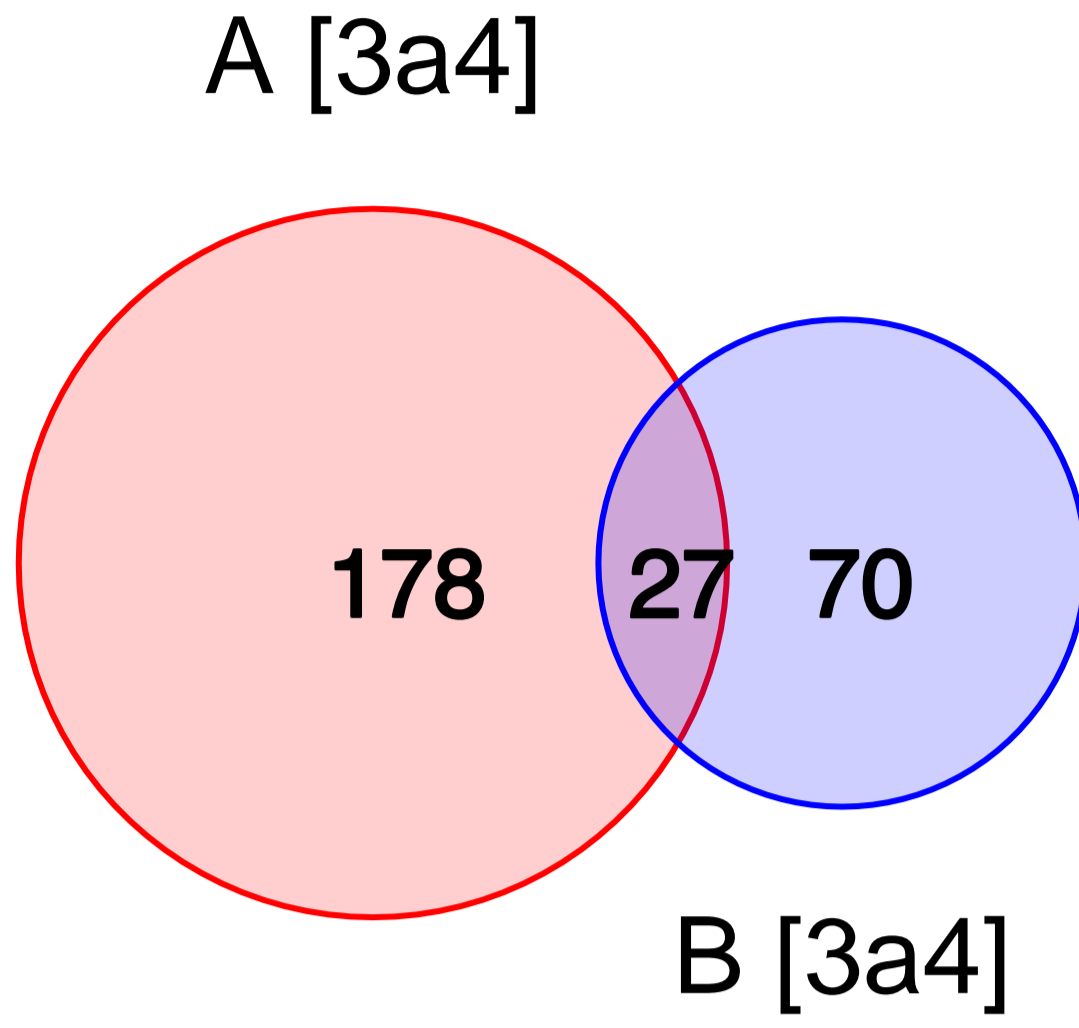

Venn Diagram

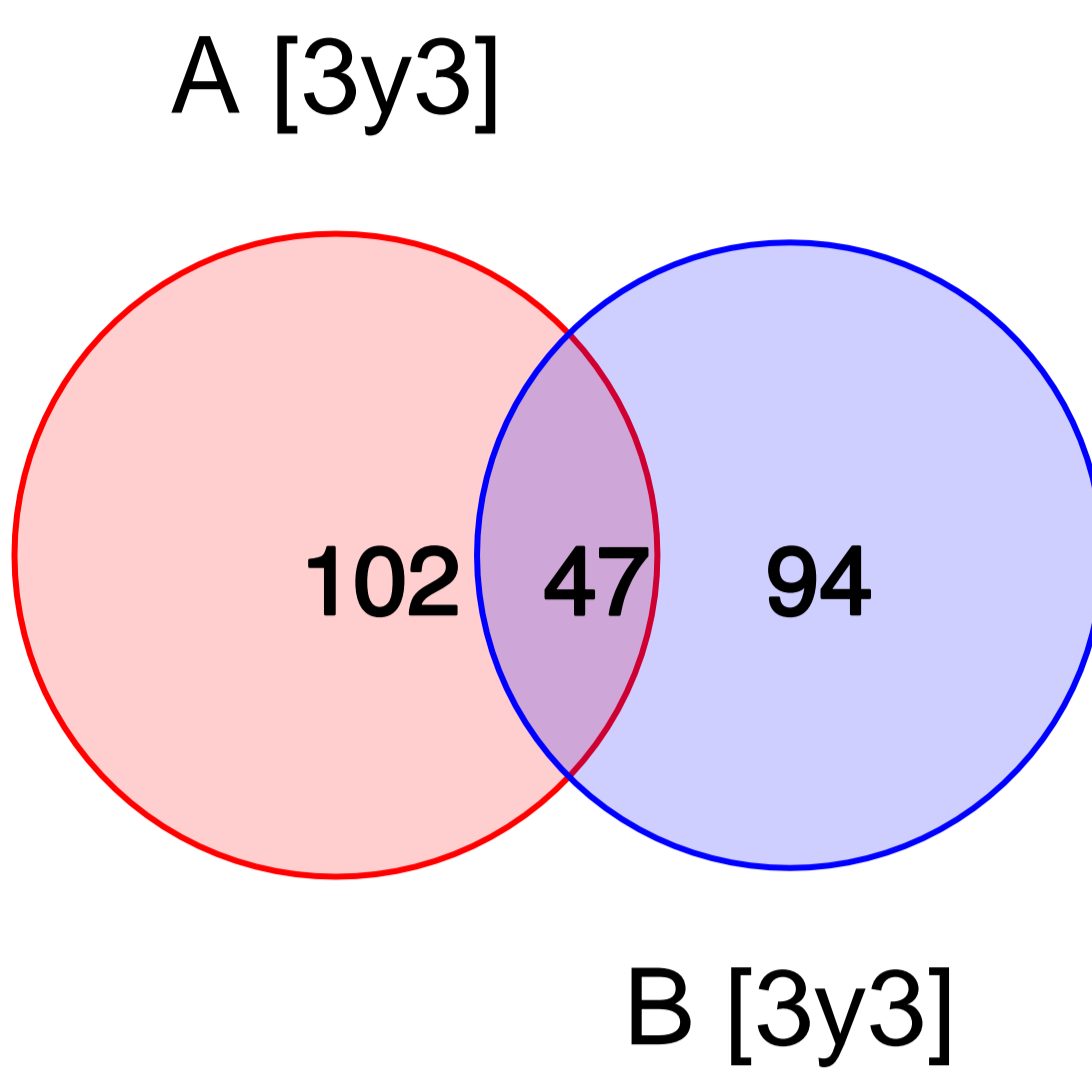

Venn Diagram

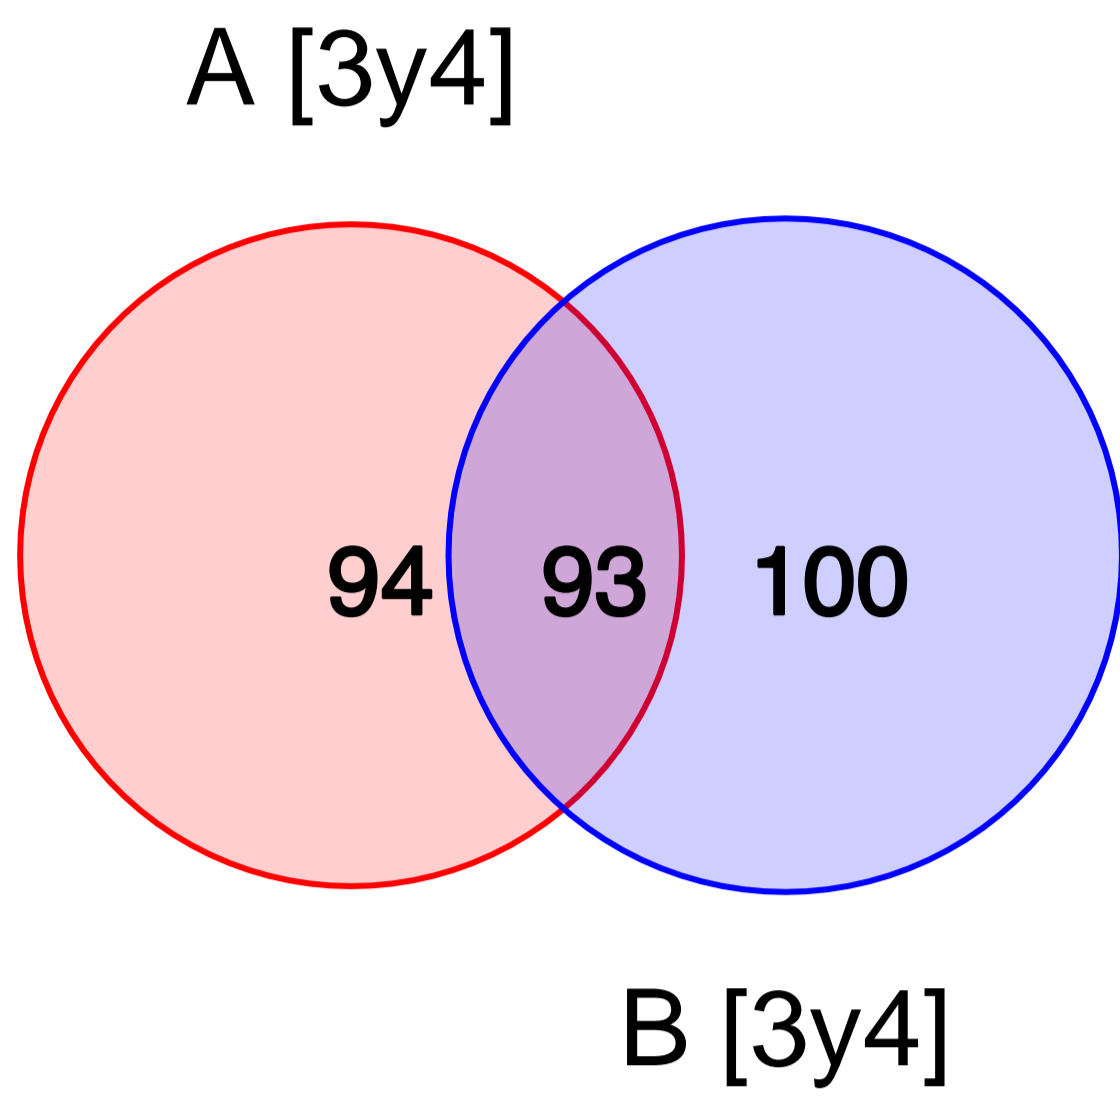

Venn Diagram

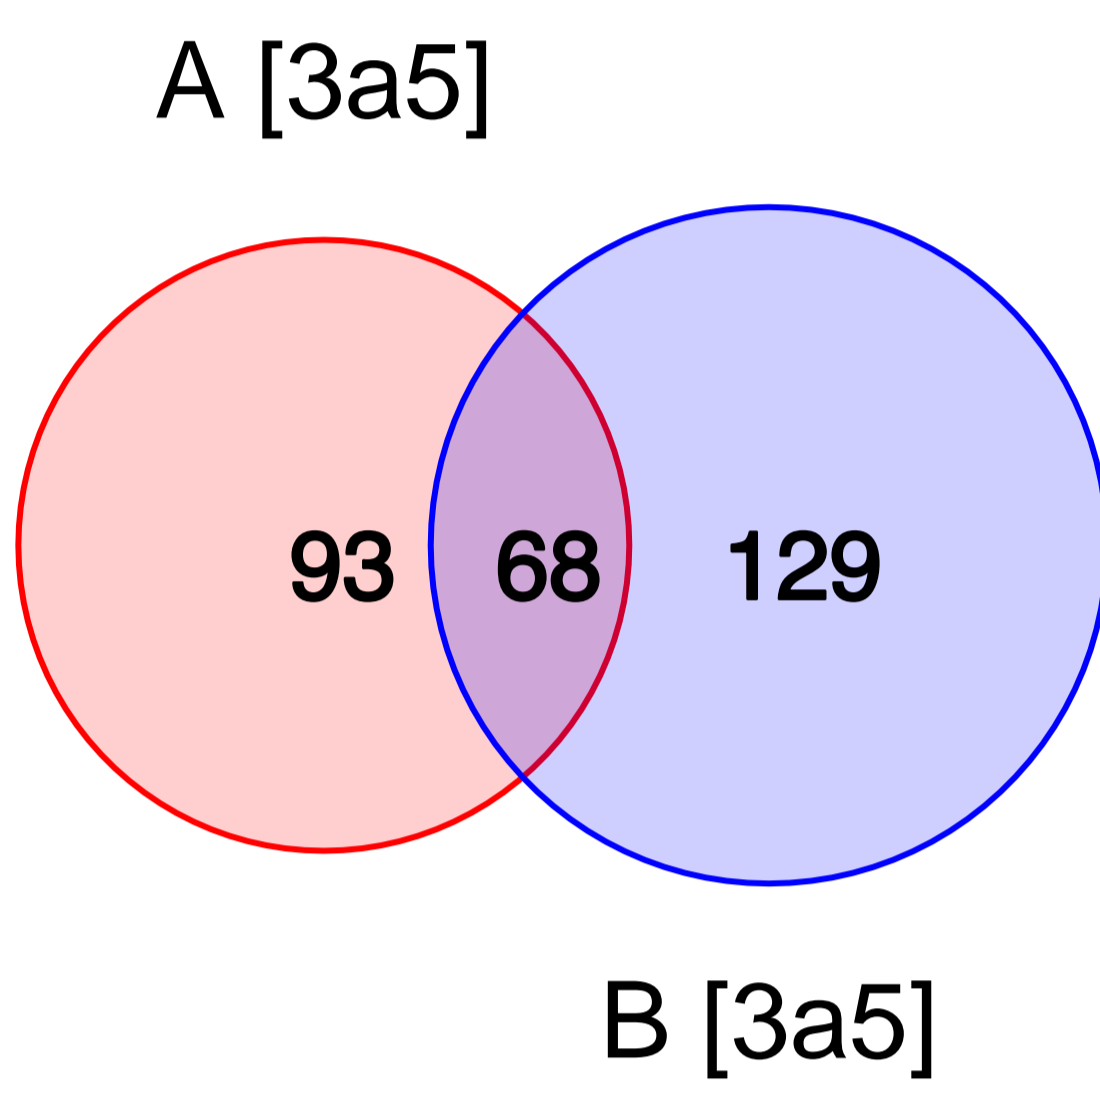

Venn Diagram

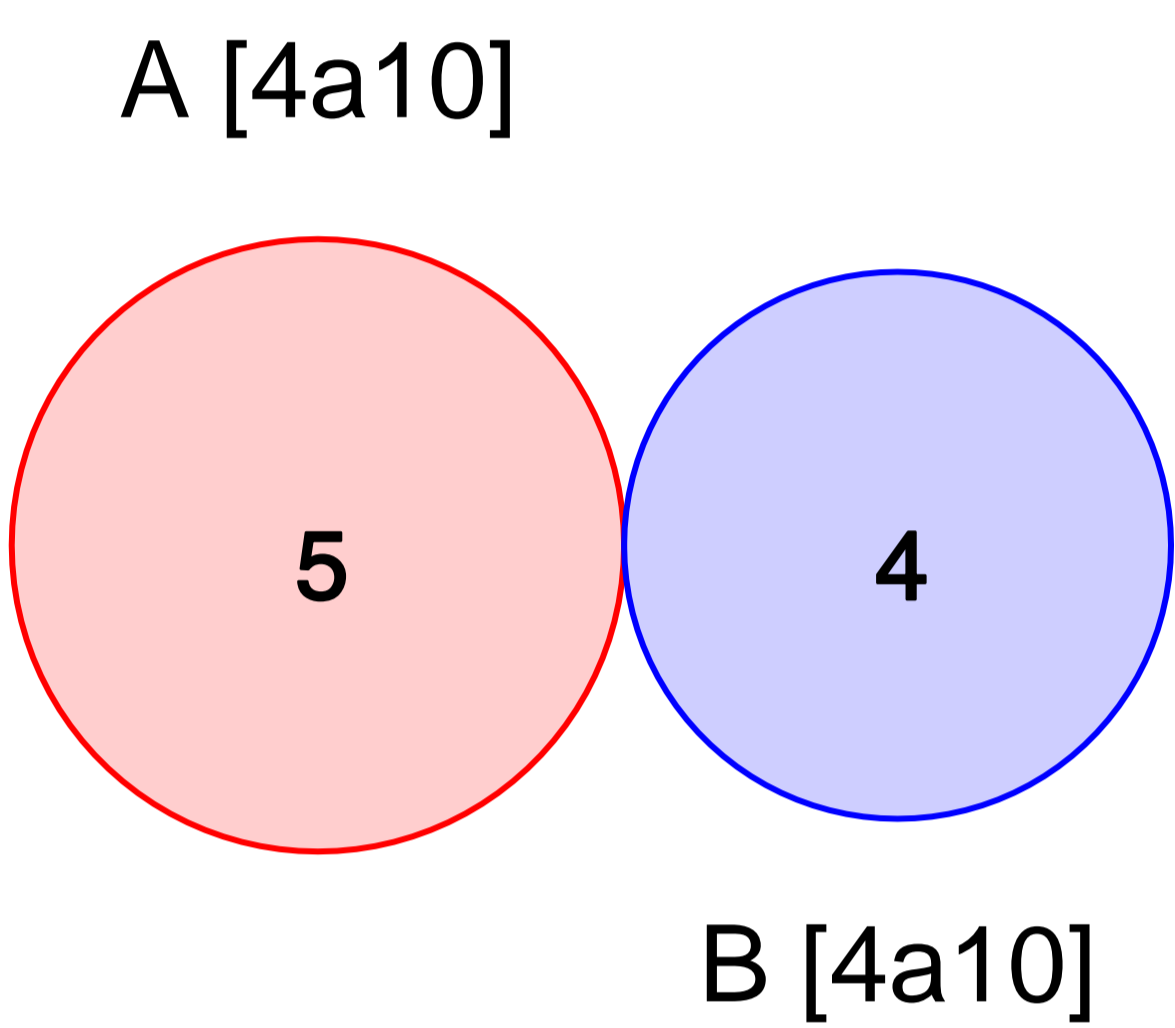

Venn Diagram

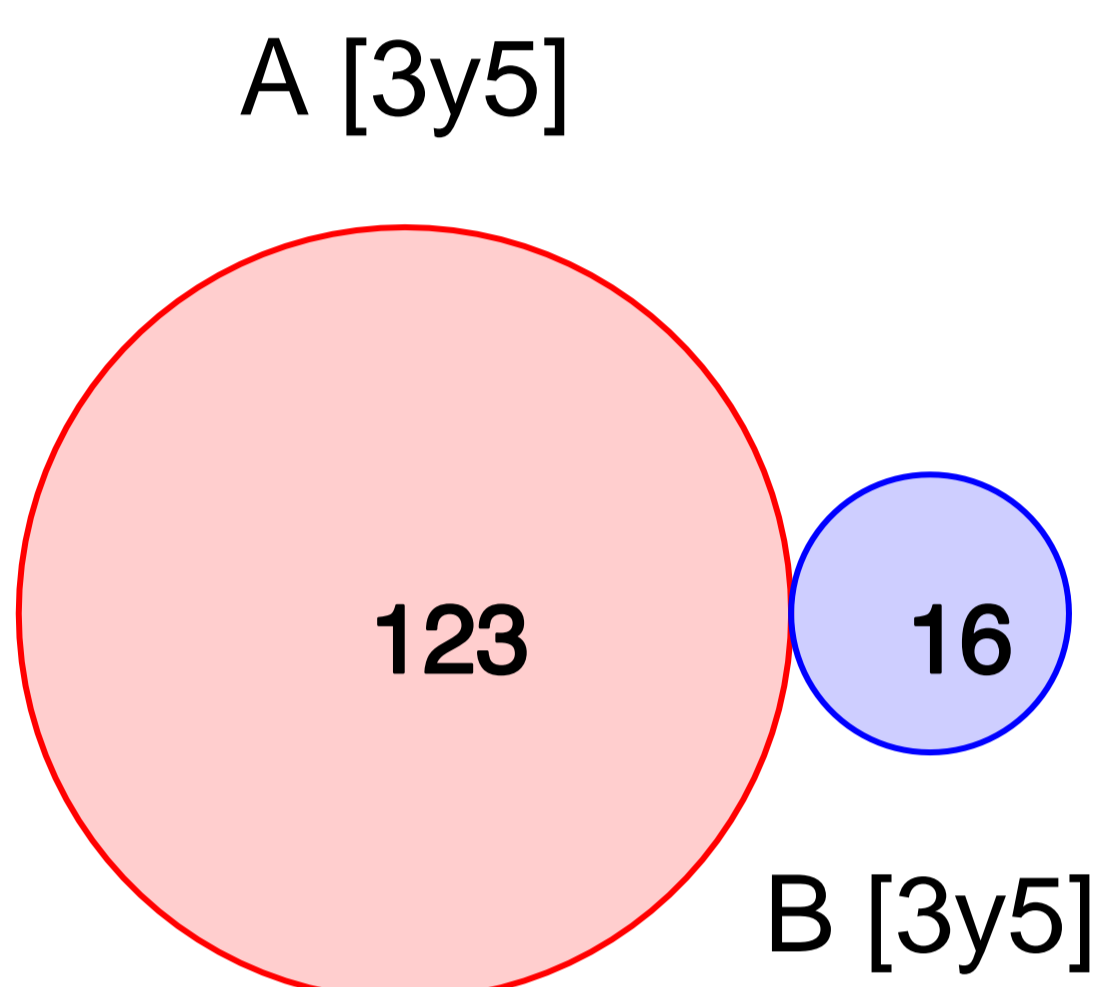

Venn Diagram

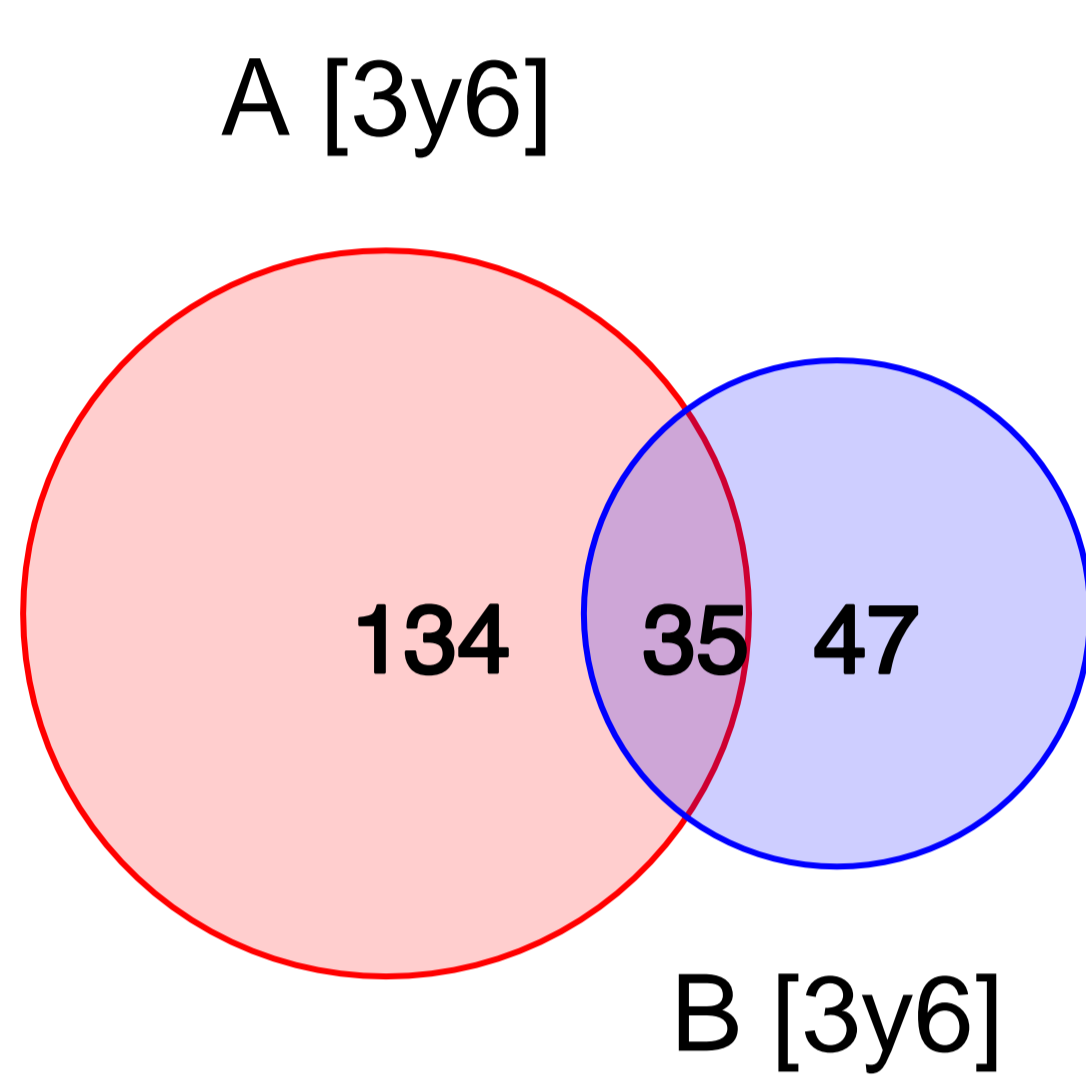

Venn Diagram

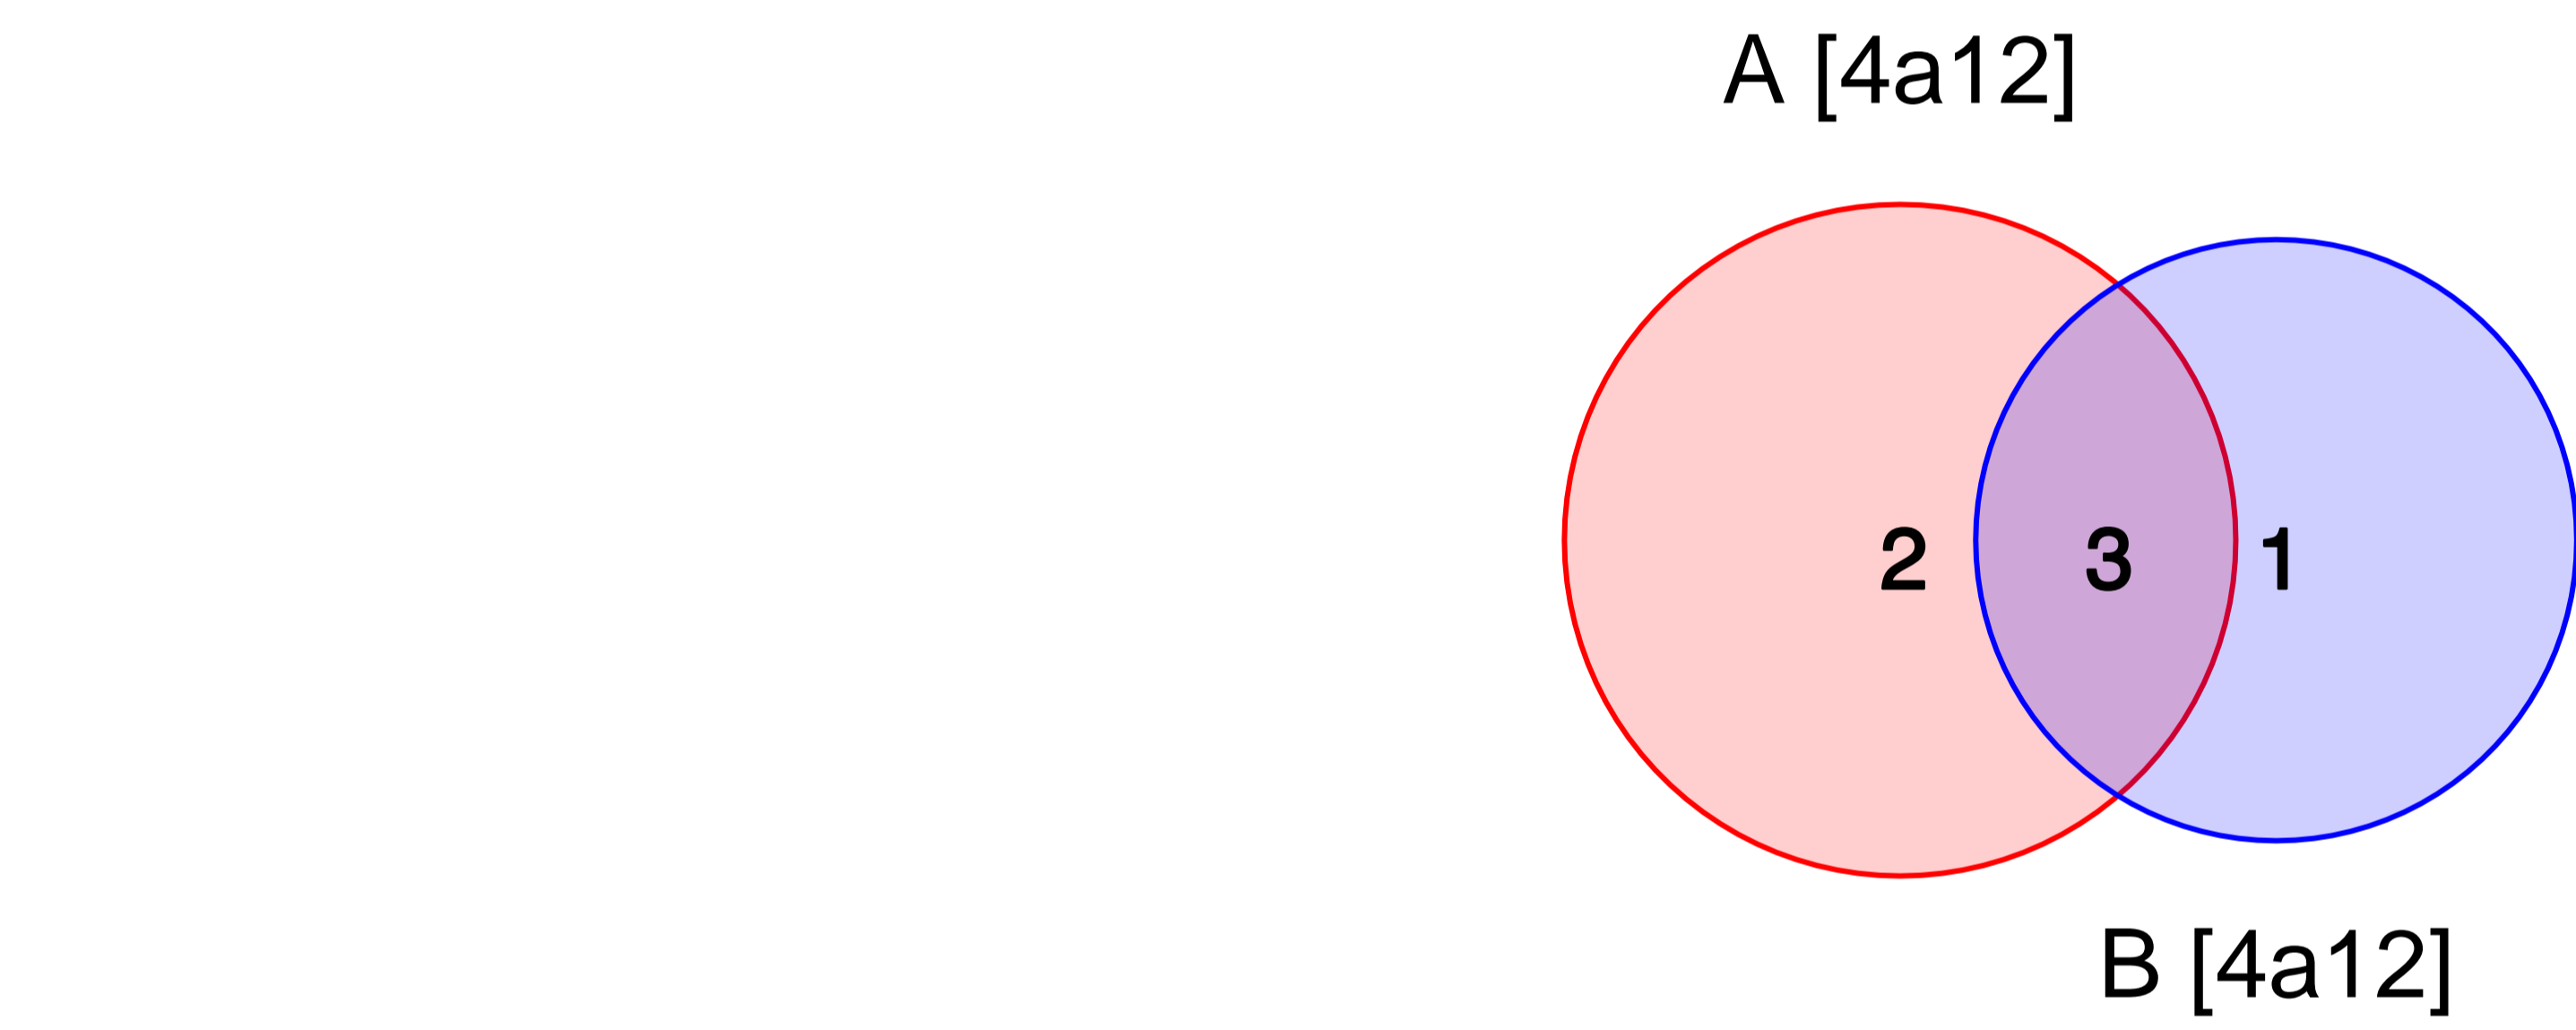

Venn Diagram

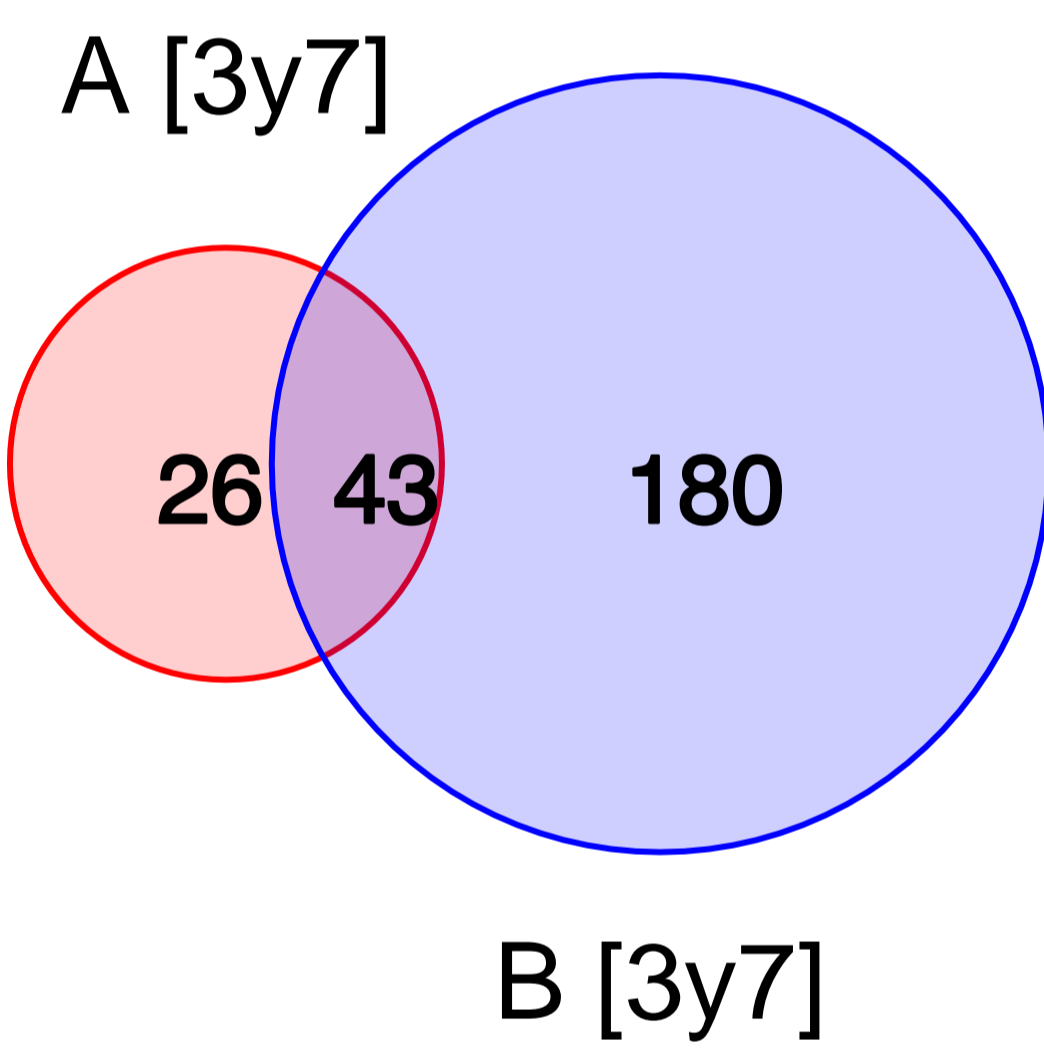

Venn Diagram

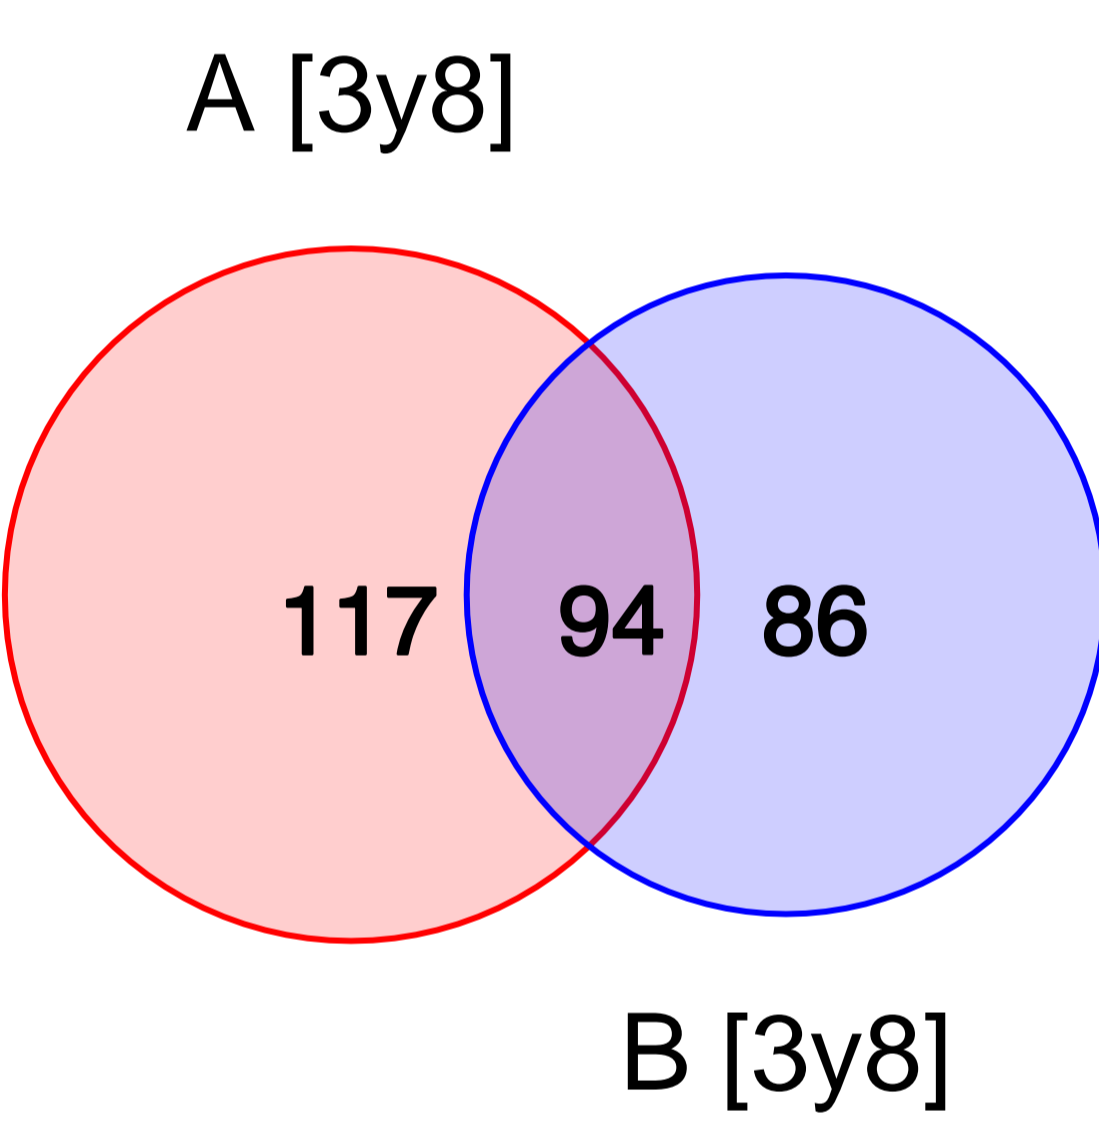

Venn Diagram

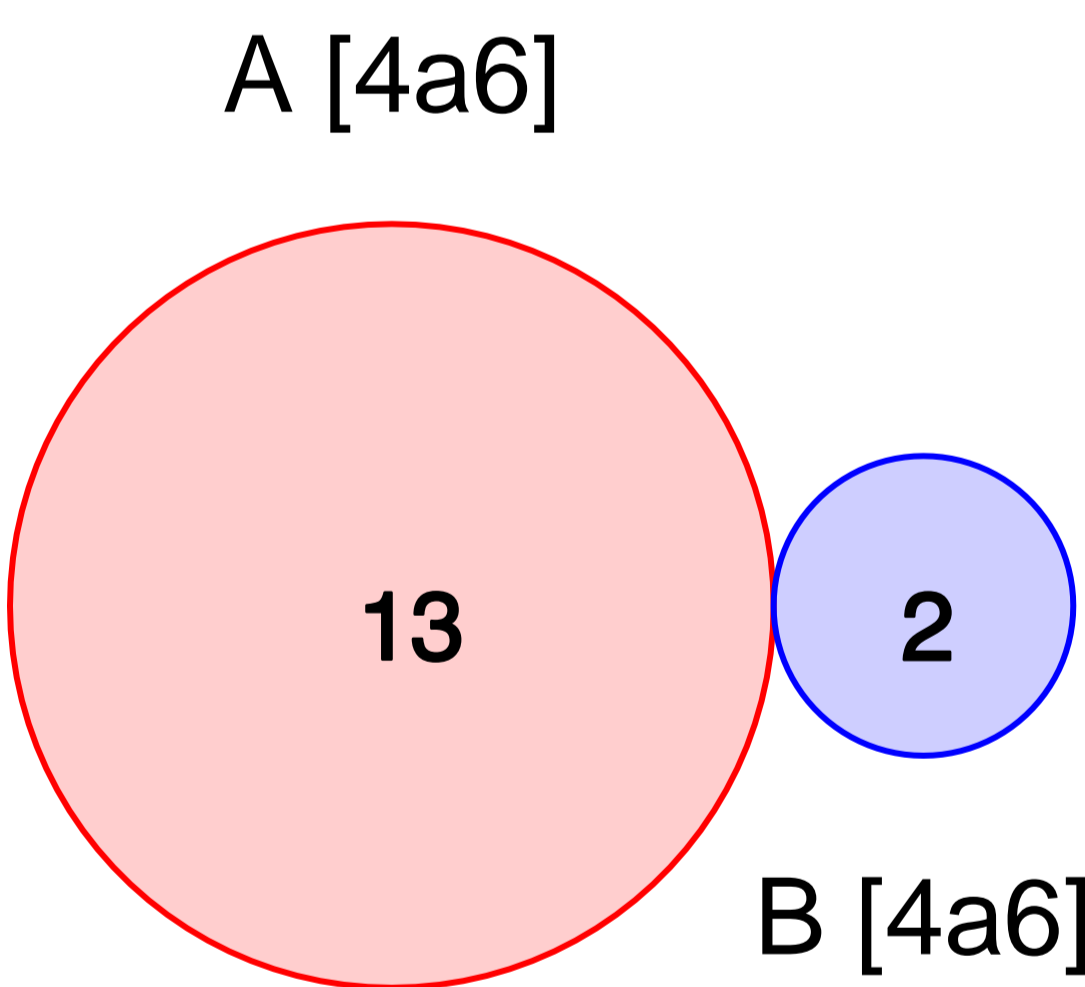

Venn Diagram

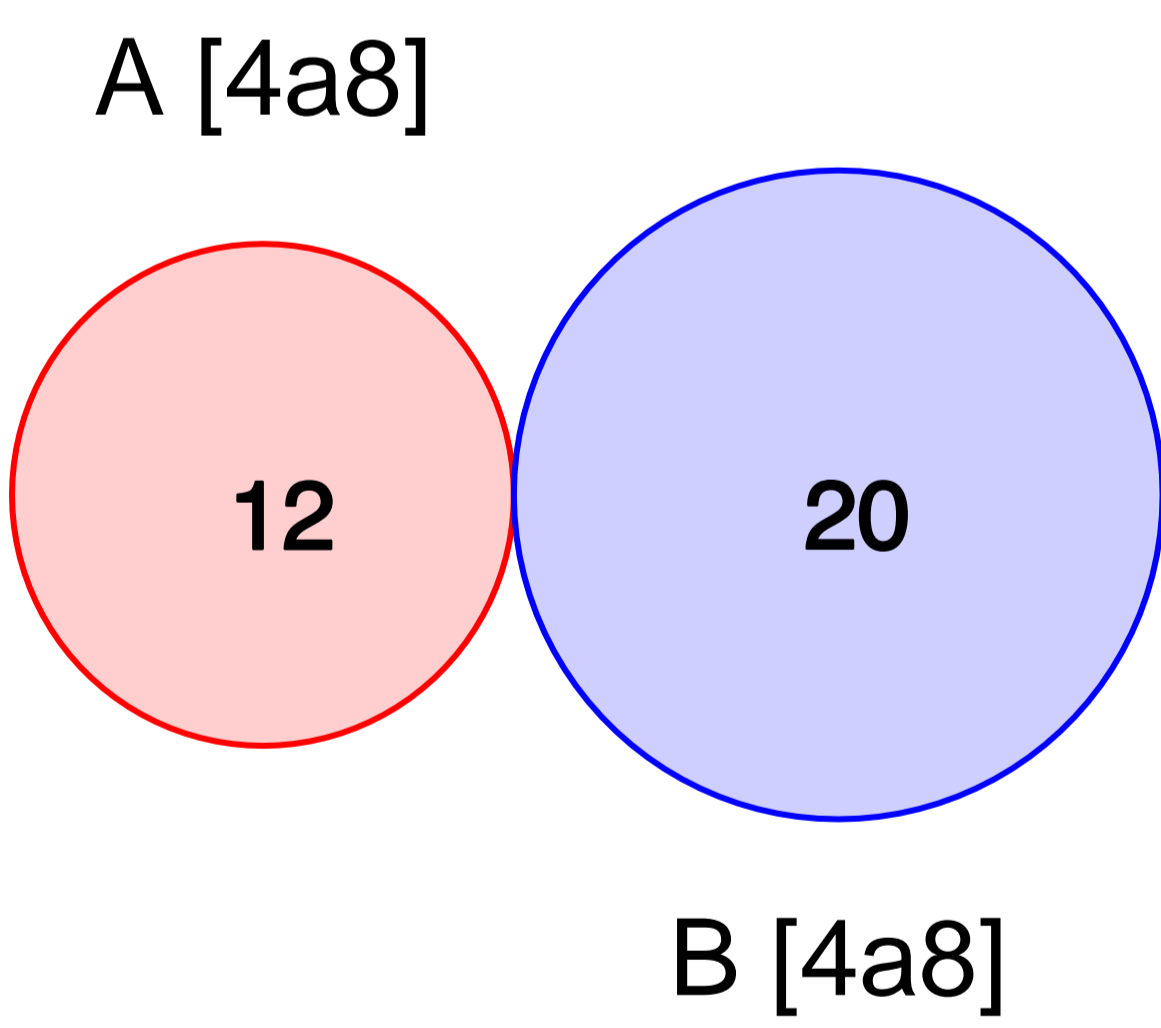

Venn Diagram

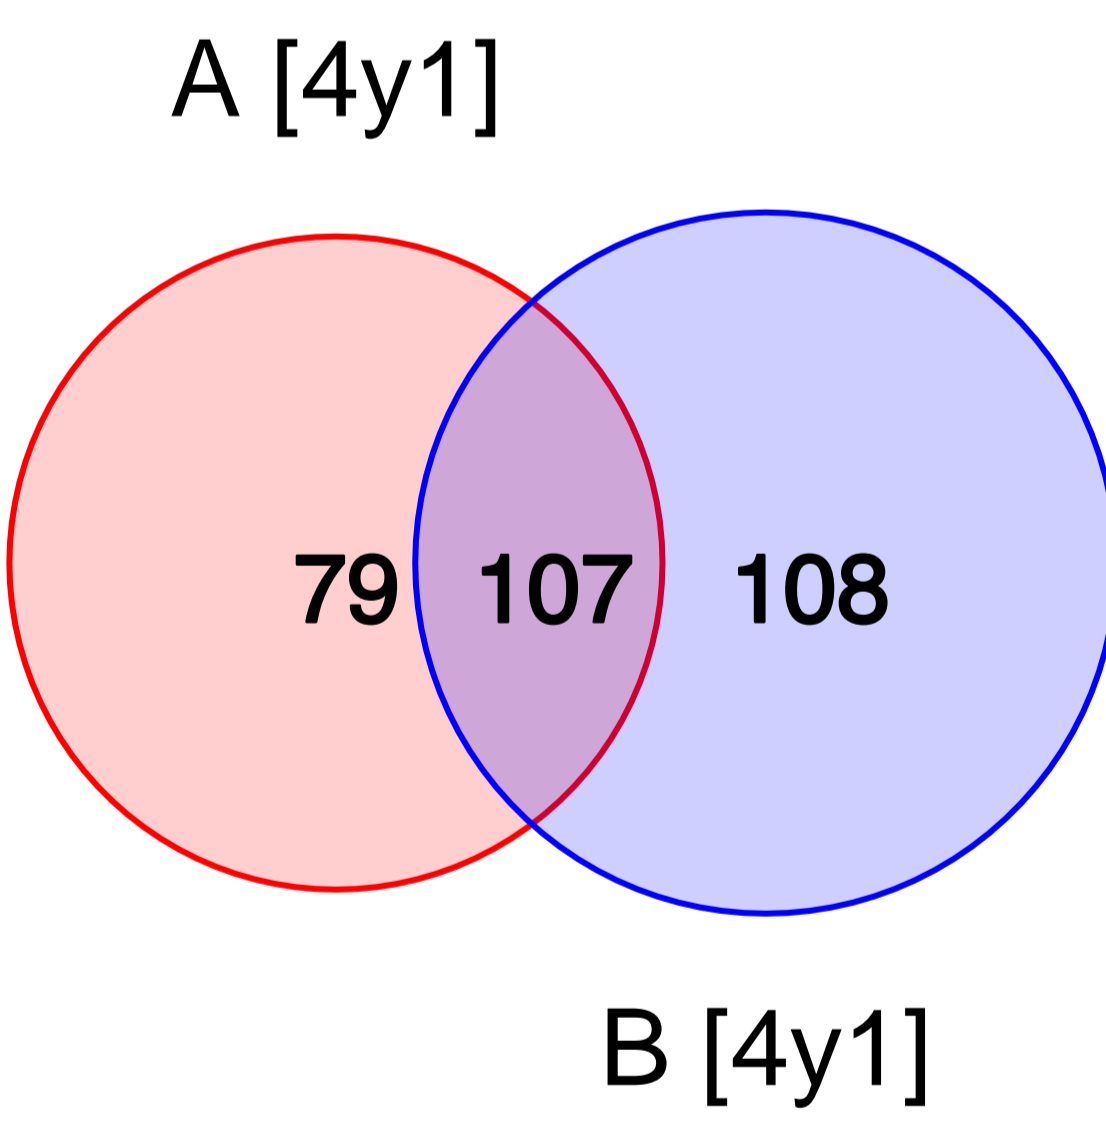

Venn Diagram

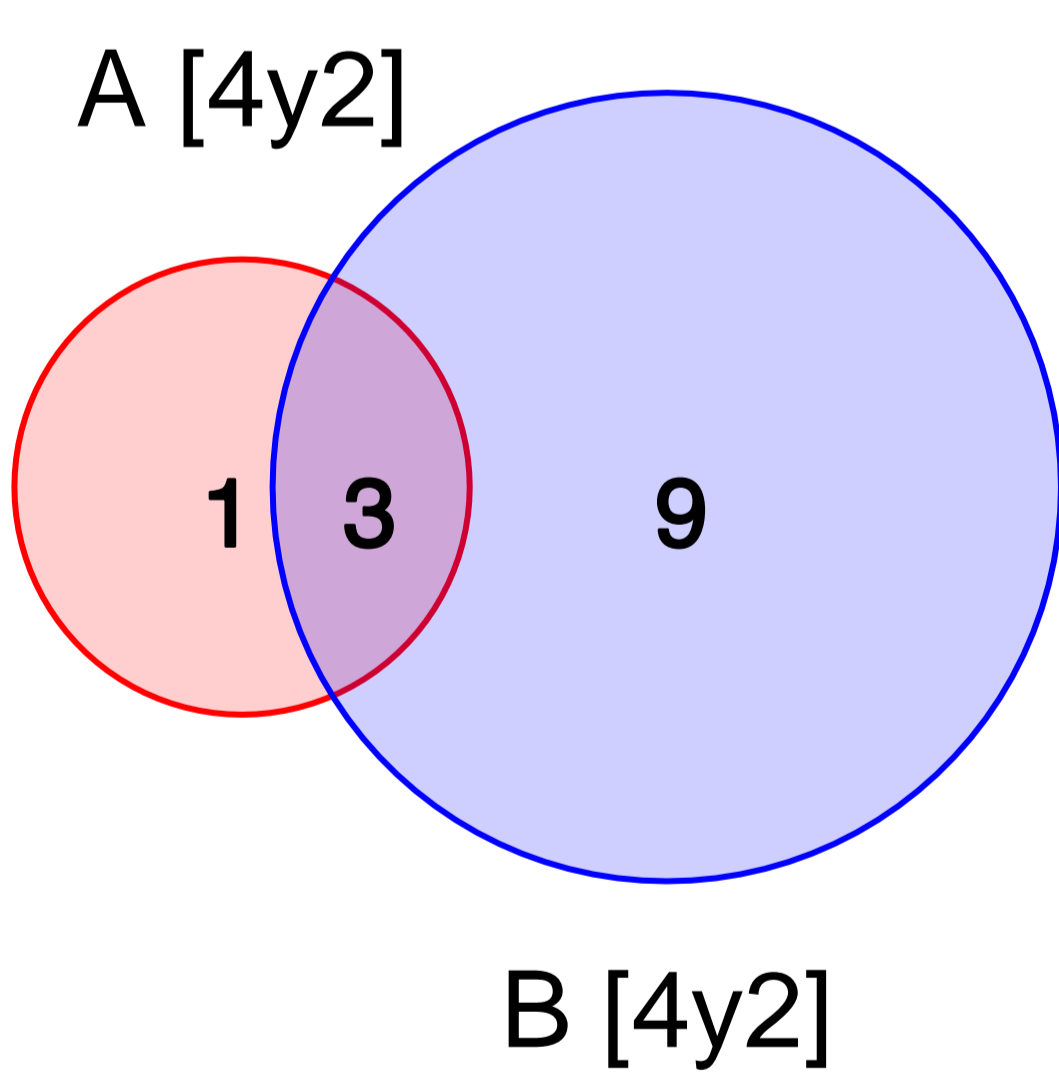

Venn Diagram

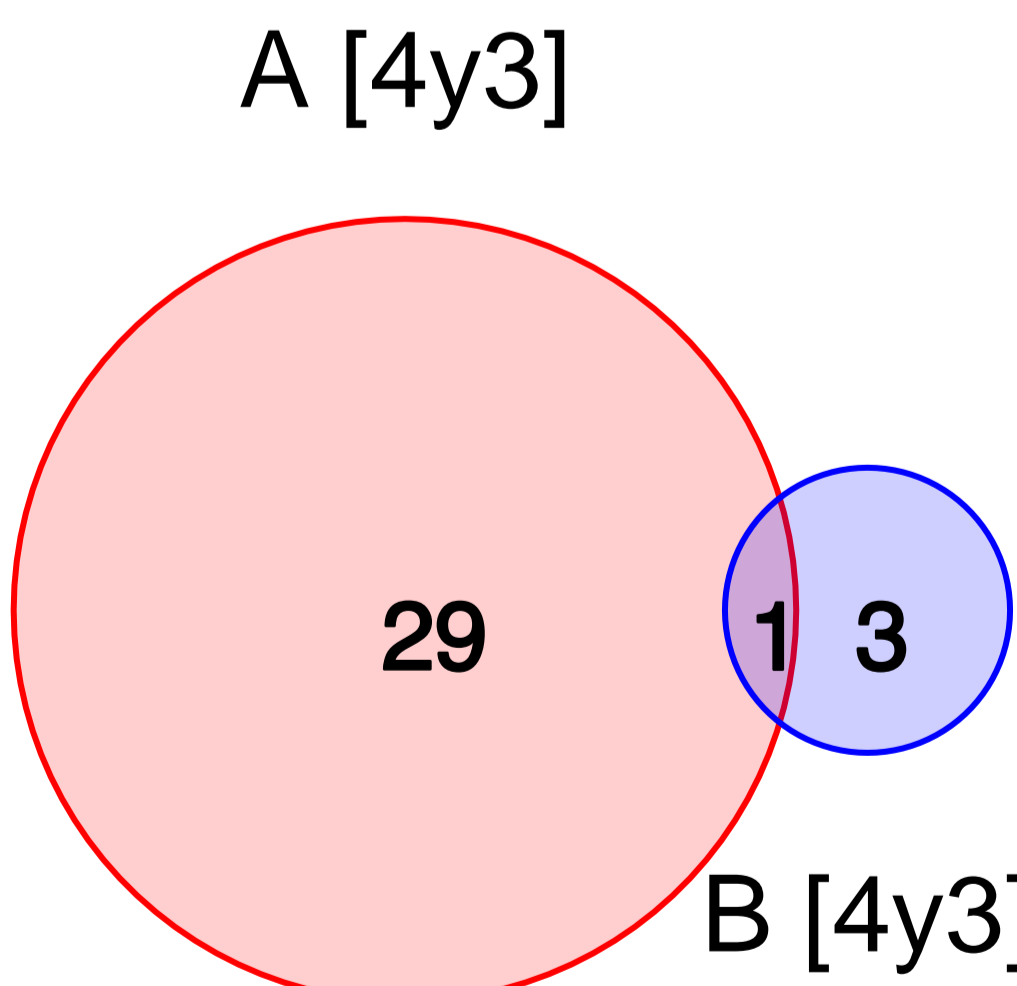

Venn Diagram

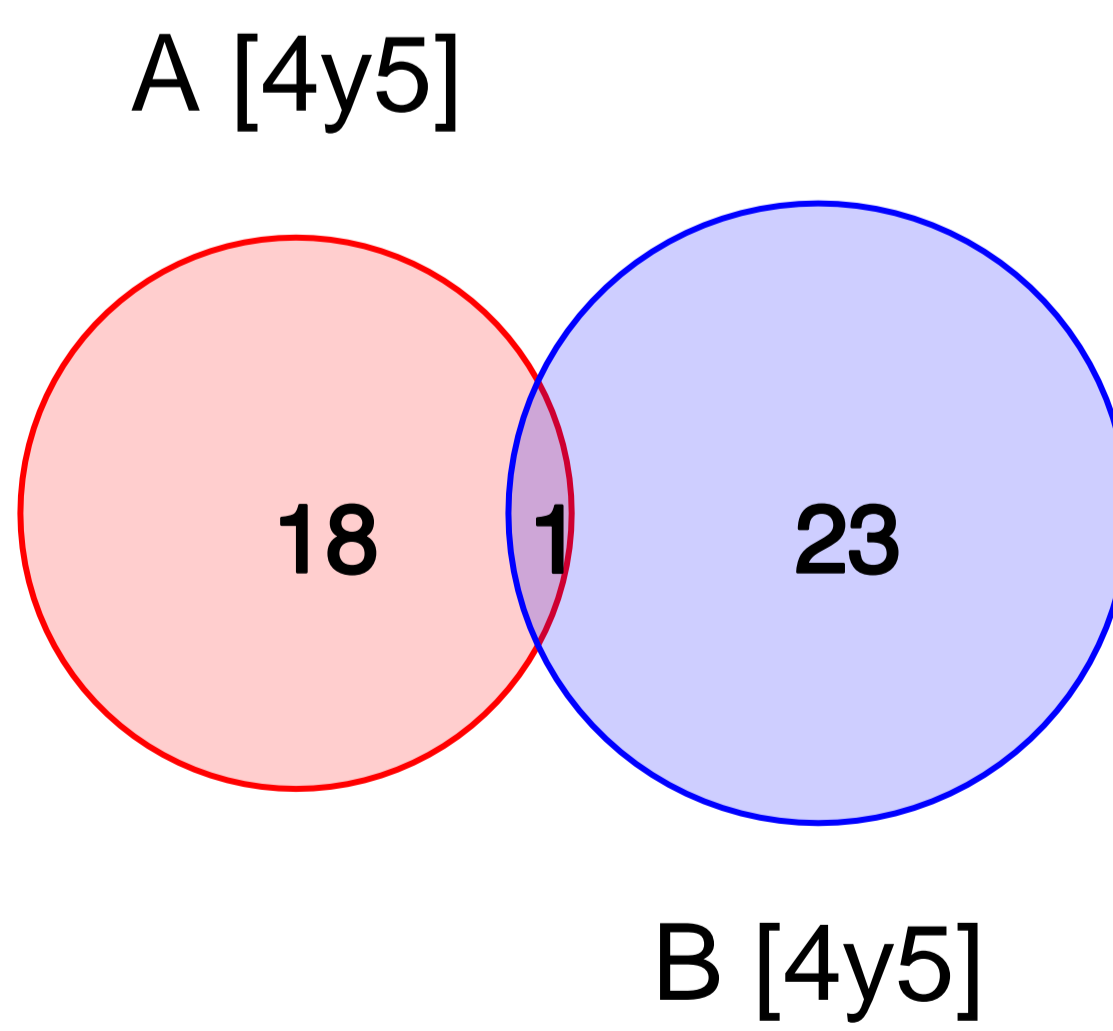

Venn Diagram

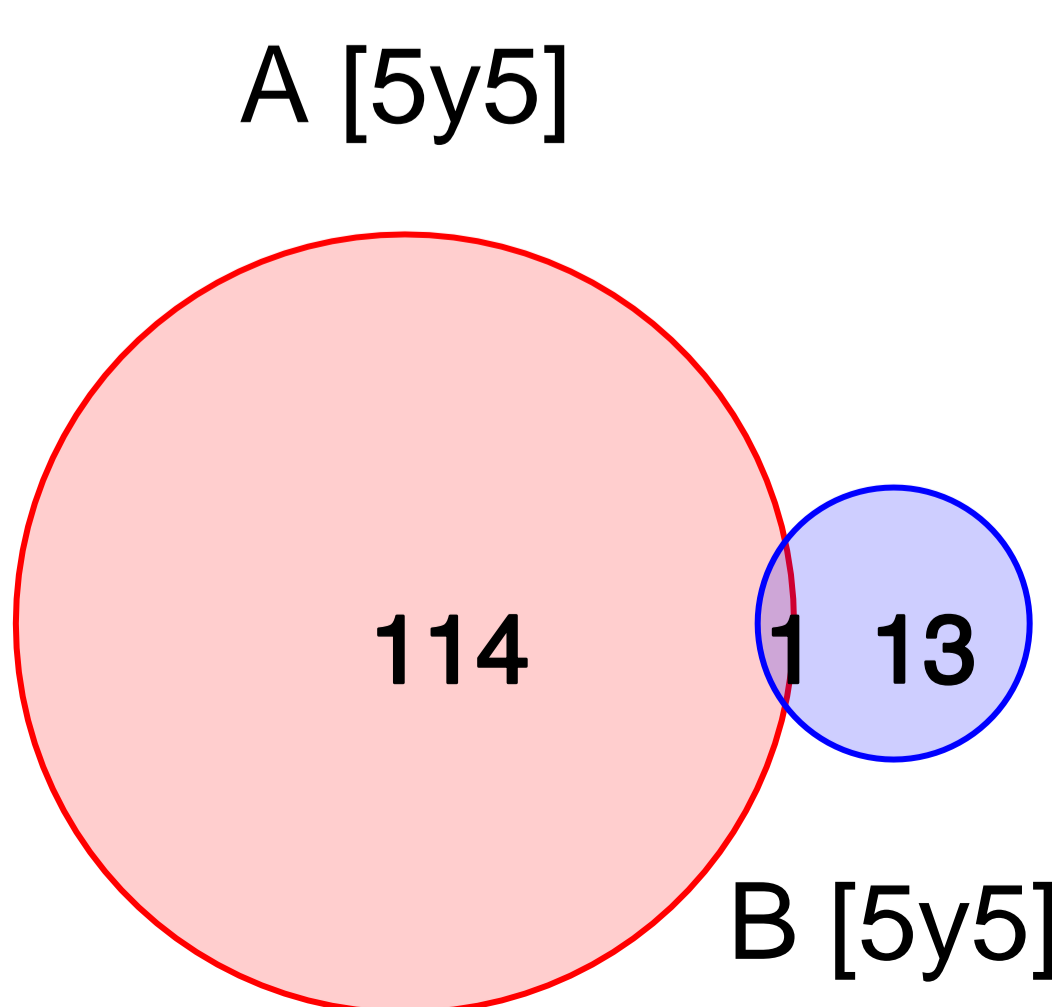

Venn Diagram

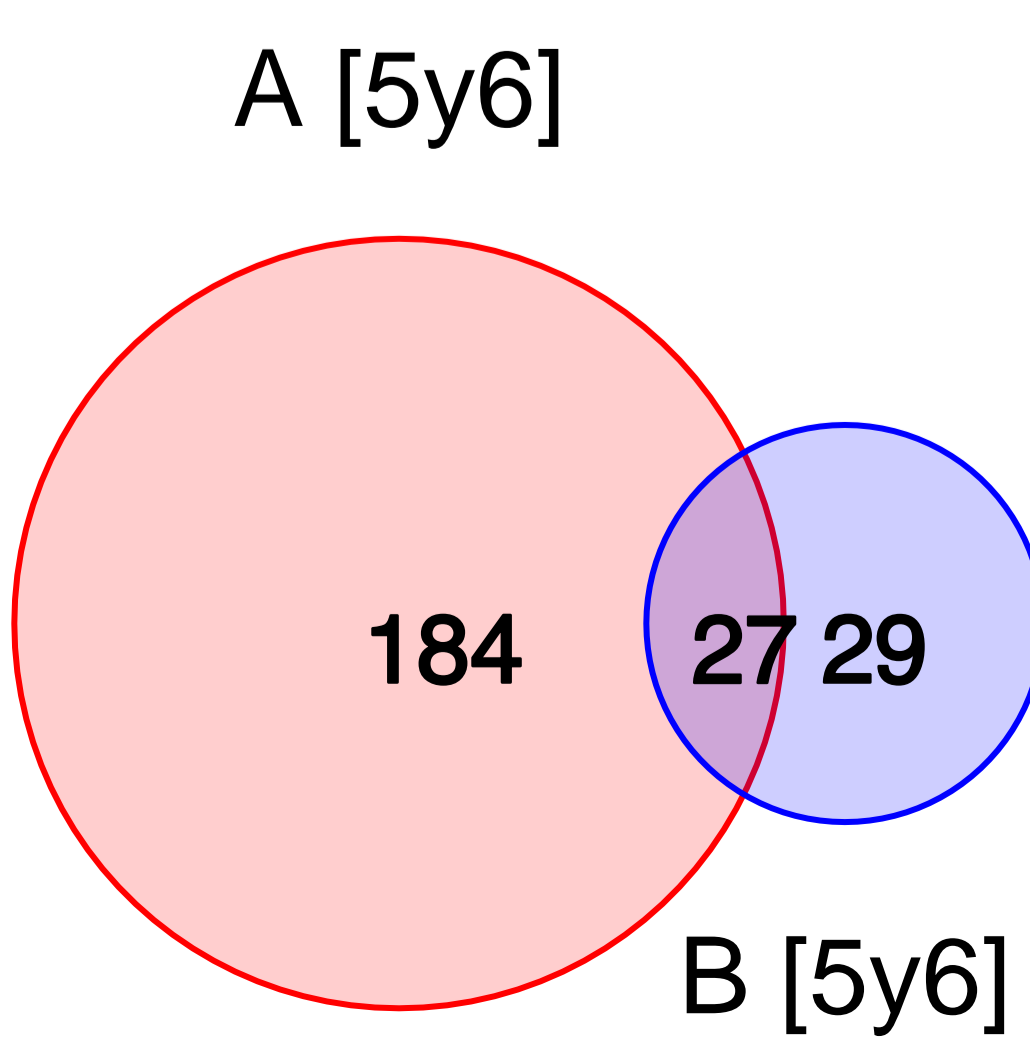

Supplement: Supplementary file [file 1]
