# Supplementary material
Source: publisher figshare collection journal article supplement (https://plos.figshare.com/articles/dataset/_/7111907)

B1\_CONTROL\_O\_1\_O1\_5

1\_CONTROL\_D\_O\_1\_O11\_CONTROL\_D\_O\_1\_O1

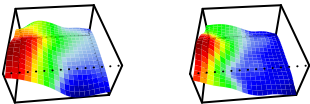

B1\_CONTROL\_Y\_1\_Y1\_6

1\_CONTROL\_D\_Y\_1\_Y11\_CONTROL\_D\_Y\_1\_Y1

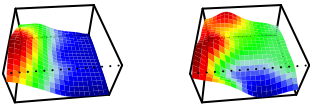

B1\_CONTROL\_Y\_1\_Y1\_2

1\_CONTROL\_D\_Y\_1\_Y11\_CONTROL\_D\_Y\_1\_Y1

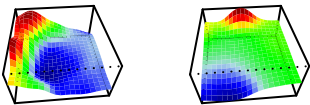

B1\_CONTROL\_Y\_1\_Y1\_5

1\_CONTROL\_D\_Y\_1\_Y11\_CONTROL\_D\_Y\_1\_Y1

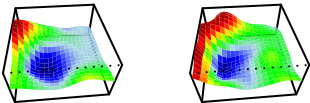

B1\_CONTROL\_Y\_1\_Y1\_7

1\_CONTROL\_D\_Y\_1\_Y11\_CONTROL\_D\_Y\_1\_Y1

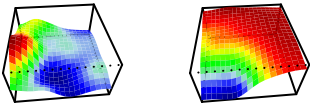

B1\_CONTROL\_O\_1\_O1\_1

1\_CONTROL\_D\_O\_1\_O11\_CONTROL\_D\_O\_1\_O1

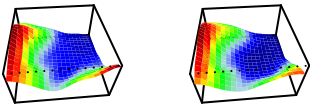

B1\_CONTROL\_O\_1\_O1\_2

1\_CONTROL\_D\_O\_1\_O11\_CONTROL\_D\_O\_1\_O1

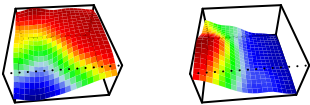

# B1\_CONTROL\_O\_1\_O1\_6

01\_CONTROL\_D\_O\_1\_O11\_CONTROL\_D\_O\_1\_O1

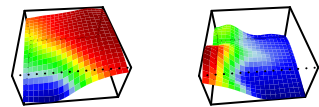

# B1\_CONTROL\_O\_1\_O1\_4

01\_CONTROL\_D\_O\_1\_O11\_CONTROL\_D\_O\_1\_O1

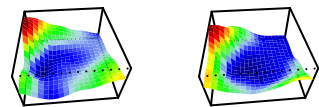

# B2\_CONTROL\_Y\_1\_Y2\_3

02\_CONTROL\_D\_Y\_1\_Y22\_CONTROL\_D\_Y\_1\_Y2

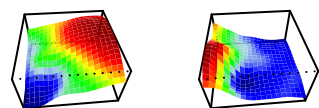

# B2\_CONTROL\_O\_1\_O2\_2

02\_CONTROL\_D\_O\_1\_O22\_CONTROL\_D\_O\_1\_O2

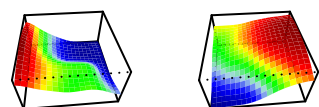

# B2\_CONTROL\_Y\_1\_Y2\_4

02\_CONTROL\_D\_Y\_1\_Y22\_CONTROL\_D\_Y\_1\_Y2

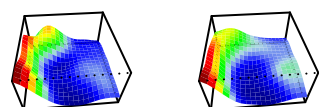

# B2\_CONTROL\_O\_1\_O2\_3

02\_CONTROL\_D\_O\_1\_O22\_CONTROL\_D\_O\_1\_O2

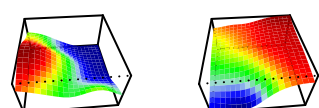

# B2\_CONTROL\_O\_1\_O2\_4

02\_CONTROL\_D\_O\_1\_O22\_CONTROL\_D\_O\_1\_O2

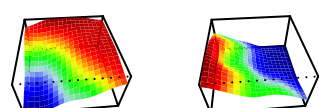

## B2\_CONTROL\_O\_1\_O2\_5

32\_CONTROL\_D\_O\_1\_O22\_CONTROL\_D\_O\_1\_O2

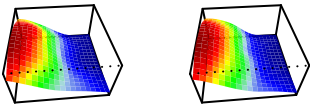

## B2\_CONTROL\_Y\_1\_Y2\_1

32\_CONTROL\_D\_Y\_1\_Y22\_CONTROL\_D\_Y\_1\_Y2

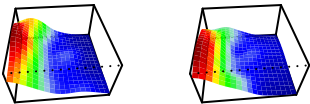

## B2\_CONTROL\_O\_1\_O2\_6

32\_CONTROL\_D\_O\_1\_O22\_CONTROL\_D\_O\_1\_O2

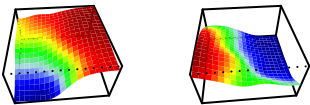

## B2\_CONTROL\_Y\_1\_Y2\_2

32\_CONTROL\_D\_Y\_1\_Y22\_CONTROL\_D\_Y\_1\_Y2

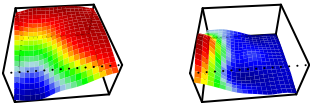

## B2\_CONTROL\_O\_1\_O2\_1

32\_CONTROL\_D\_O\_1\_O22\_CONTROL\_D\_O\_1\_O2

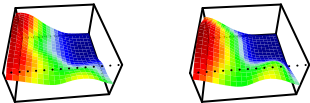

## B2\_CONTROL\_O\_1\_O2\_7

32\_CONTROL\_D\_O\_1\_O22\_CONTROL\_D\_O\_1\_O2

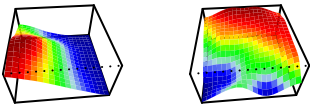

## B3\_CONTROL\_Y\_1\_Y3\_4

33\_CONTROL\_D\_Y\_1\_Y33\_CONTROL\_D\_Y\_1\_Y3

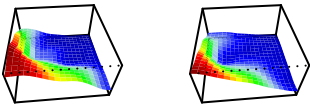

# B3\_CONTROL\_O\_1\_O3\_1

33\_CONTROL\_D\_O\_1\_O33\_CONTROL\_D\_O\_1\_O3

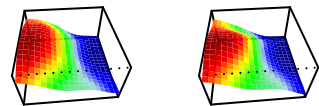

# B3\_CONTROL\_Y\_1\_Y3\_5

33\_CONTROL\_D\_Y\_1\_Y33\_CONTROL\_D\_Y\_1\_Y3

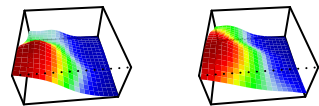

# B3\_CONTROL\_O\_1\_O3\_2

33\_CONTROL\_D\_O\_1\_O33\_CONTROL\_D\_O\_1\_O3

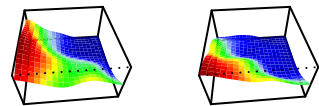

# B3\_CONTROL\_Y\_1\_Y3\_7

33\_CONTROL\_D\_Y\_1\_Y33\_CONTROL\_D\_Y\_1\_Y3

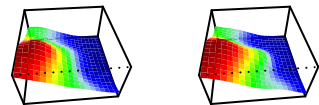

# B3\_CONTROL\_O\_1\_O3\_3

33\_CONTROL\_D\_O\_1\_O33\_CONTROL\_D\_O\_1\_O3

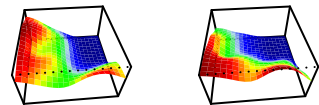

# B3\_CONTROL\_O\_1\_O3\_5

33\_CONTROL\_D\_O\_1\_O33\_CONTROL\_D\_O\_1\_O3

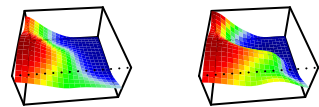

# B3\_CONTROL\_Y\_1\_Y3\_1

33\_CONTROL\_D\_Y\_1\_Y33\_CONTROL\_D\_Y\_1\_Y3

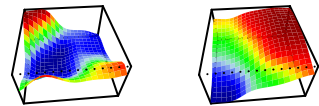

# B3\_CONTROL\_O\_1\_O3\_6

33\_CONTROL\_D\_O\_1\_O33\_CONTROL\_D\_O\_1\_O3

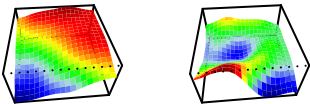

# B3\_CONTROL\_Y\_1\_Y3\_2

33\_CONTROL\_D\_Y\_1\_Y33\_CONTROL\_D\_Y\_1\_Y3

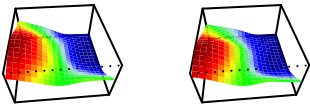

# B3\_CONTROL\_O\_1\_O3\_7

33\_CONTROL\_D\_O\_1\_O33\_CONTROL\_D\_O\_1\_O3

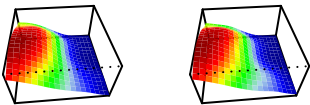

# TY203P1\_CASIN\_O\_1\_O5\_1

203P1\_CASIN\_D\_O\_1\_O203P1\_CASIN\_D\_O\_1\_O

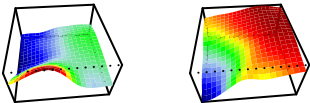

# TY1\_CONTROL\_Y\_1\_Y4\_4

Y1\_CONTROL\_D\_Y\_1\_Y4Y1\_CONTROL\_D\_Y\_1\_Y4

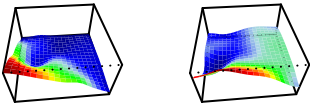

# TY203P1\_CASIN\_O\_1\_O5\_7

203P1\_CASIN\_D\_O\_1\_O203P1\_CASIN\_D\_O\_1\_O

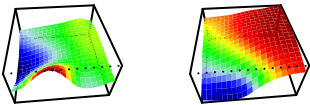

# T02\_CONTROL\_O\_1\_O4\_5

02\_CONTROL\_D\_O\_1\_O202\_CONTROL\_D\_O\_1\_O2

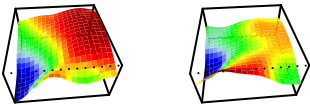

## TY3\_CONTROL\_Y\_1\_Y6\_2

TY3\_CONTROL\_D\_Y\_1\_Y6TY3\_CONTROL\_D\_Y\_1\_Y6

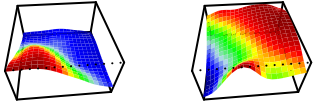

## TO2\_CASIN\_O\_1\_O4\_4

TO2\_CASIN\_D\_O\_1\_O4\_TO2\_CASIN\_D\_O\_1\_O4

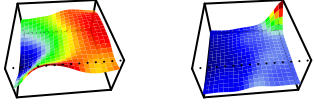

## TY3\_WNT5A\_Y\_1\_Y6\_2

TY3\_WNT5A\_D\_Y\_1\_Y6TY3\_WNT5A\_D\_Y\_1\_Y6

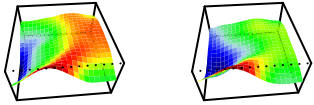

## TY3\_WNT5A\_Y\_1\_Y6\_8

TY3\_WNT5A\_D\_Y\_1\_Y6TY3\_WNT5A\_D\_Y\_1\_Y6

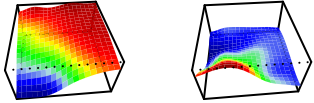

## TY2O3P1\_CONTROL\_Y\_1\_Y5\_3

O3P1\_CONTROL\_D\_Y\_1\_Y5O3P1\_CONTROL\_D\_Y\_1\_Y5

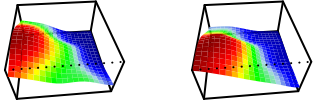

## TO4\_CONTROL\_O\_1\_O6\_6

O4\_CONTROL\_D\_O\_1\_O6O4\_CONTROL\_D\_O\_1\_O6

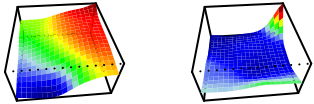

## TY2O3P2\_WNT5A\_Y\_1\_Y5\_5

O3P2\_WNT5A\_D\_Y\_1\_Y5O3P2\_WNT5A\_D\_Y\_1\_Y5

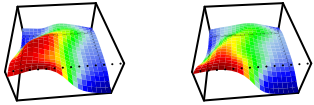

## TO4\_CASIN\_O\_1\_O6\_6

TO4\_CASIN\_D\_O\_1\_O6\_TO4\_CASIN\_D\_O\_1\_O6\_

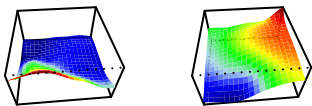

## TY2O3P2\_CONTROL\_O\_1\_O5\_3

O3P2\_CONTROL\_D\_O\_1\_O3P2\_CONTROL\_D\_O\_1

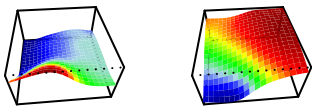

## TY2O3P1\_CASIN\_O\_1\_O5\_2

O3P1\_CASIN\_D\_O\_1\_O3P1\_CASIN\_D\_O\_1\_C

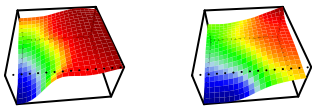

## TY1\_CONTROL\_Y\_1\_Y4\_5

Y1\_CONTROL\_D\_Y\_1\_Y4\_Y1\_CONTROL\_D\_Y\_1\_Y4

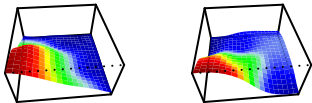

## TY2O3P1\_CASIN\_O\_1\_O5\_8

O3P1\_CASIN\_D\_O\_1\_O3P1\_CASIN\_D\_O\_1\_C

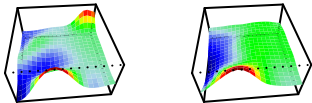

## TY2O3P2\_CONTROL\_O\_1\_O5\_4

O3P2\_CONTROL\_D\_O\_1\_O3P2\_CONTROL\_D\_O\_1

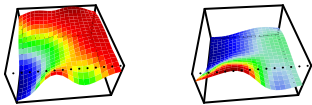

## TO2\_CONTROL\_O\_1\_O4\_6

O2\_CONTROL\_D\_O\_1\_OO2\_CONTROL\_D\_O\_1\_O

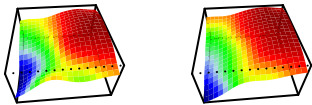

# TY3\_CONTROL\_Y\_1\_Y6\_3

TY3\_CONTROL\_D\_Y\_1\_Y6TY3\_CONTROL\_D\_Y\_1\_Y

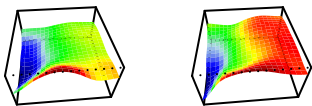

# TO2\_CASIN\_O\_1\_O4\_5

TO2\_CASIN\_D\_O\_1\_O4\_TO2\_CASIN\_D\_O\_1\_O4

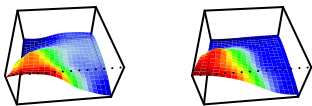

# TY3\_WNT5A\_Y\_1\_Y6\_3

TY3\_WNT5A\_D\_Y\_1\_Y6\_TY3\_WNT5A\_D\_Y\_1\_Y6

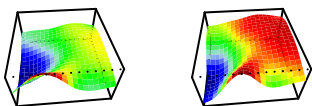

# TY3\_WNT5A\_Y\_1\_Y6\_11

TY3\_WNT5A\_D\_Y\_1\_Y6\_TY3\_WNT5A\_D\_Y\_1\_Y6

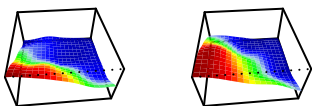

# TO4\_CONTROL\_O\_1\_O6\_1

TO4\_CONTROL\_D\_O\_1\_O6TO4\_CONTROL\_D\_O\_1\_O

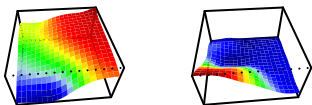

# TY2O3P2\_CONTROL\_Y\_1\_Y5\_4

O3P2\_CONTROL\_D\_Y\_1\_Y5O3P2\_CONTROL\_D\_Y\_1\_Y

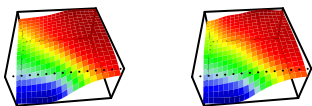

# TO4\_CONTROL\_O\_1\_O6\_7

TO4\_CONTROL\_D\_O\_1\_O6TO4\_CONTROL\_D\_O\_1\_O

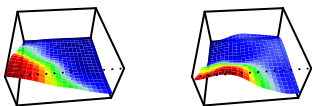

TY2O3P2\_WNT5A\_Y\_1\_Y5\_6

TY2O3P2\_WNT5A\_Y\_1\_Y5\_6 TY2O3P2\_WNT5A\_Y\_1\_Y5\_6

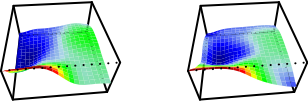

TO4\_CASIN\_O\_1\_O6\_7

TO4\_CASIN\_O\_1\_O6\_7 TO4\_CASIN\_O\_1\_O6\_7

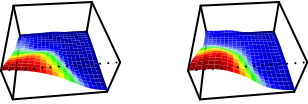

TY2O3P1\_CASIN\_O\_1\_O5\_3

TY2O3P1\_CASIN\_O\_1\_O5\_3 TY2O3P1\_CASIN\_O\_1\_O5\_3

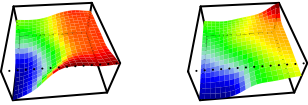

TY1\_WNT5A\_Y\_1\_Y4\_1

TY1\_WNT5A\_Y\_1\_Y4\_1 TY1\_WNT5A\_Y\_1\_Y4\_1

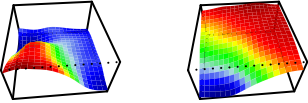

TY2O3P2\_CONTROL\_O\_1\_O5\_5

TY2O3P2\_CONTROL\_O\_1\_O5\_5 TY2O3P2\_CONTROL\_O\_1\_O5\_5

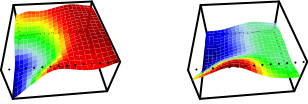

TO2\_CONTROL\_O\_1\_O4\_1

TO2\_CONTROL\_O\_1\_O4\_1 TO2\_CONTROL\_O\_1\_O4\_1

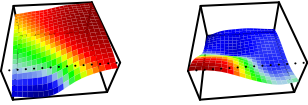

TO2\_CONTROL\_O\_1\_O4\_7

TO2\_CONTROL\_O\_1\_O4\_7 TO2\_CONTROL\_O\_1\_O4\_7

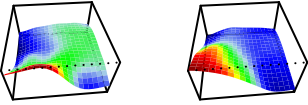

# TY3\_CONTROL\_Y\_1\_Y6\_4

TY3\_CONTROL\_D\_Y\_1\_Y TY3\_CONTROL\_D\_Y\_1\_Y

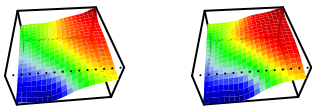

# TO2\_CASIN\_O\_1\_O4\_6

TO2\_CASIN\_D\_O\_1\_O4 TO2\_CASIN\_D\_O\_1\_O4

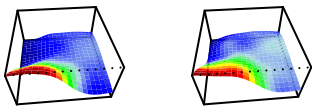

# TY3\_WNT5A\_Y\_1\_Y6\_4

TY3\_WNT5A\_D\_Y\_1\_Y6 TY3\_WNT5A\_D\_Y\_1\_Y6

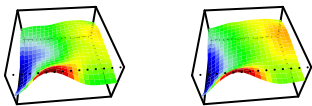

# TY3\_WNT5A\_Y\_1\_Y6\_12

TY3\_WNT5A\_D\_Y\_1\_Y6 TY3\_WNT5A\_D\_Y\_1\_Y6

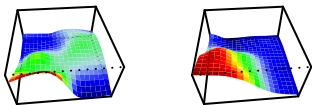

# TO4\_CONTROL\_O\_1\_O6\_2

O4\_CONTROL\_D\_O\_1\_O6 O4\_CONTROL\_D\_O\_1\_O6

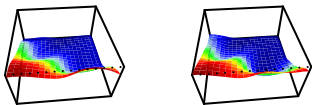

# TY2O3P2\_WNT5A\_Y\_1\_Y5\_1

TY2O3P2\_WNT5A\_D\_Y\_1\_Y5 TY2O3P2\_WNT5A\_D\_Y\_1\_Y5

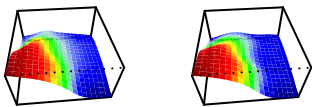

# TO4\_CASIN\_O\_1\_O6\_1

TO4\_CASIN\_D\_O\_1\_O6 TO4\_CASIN\_D\_O\_1\_O6

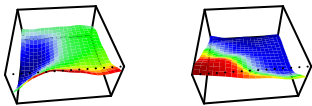

TY3\_WNT5A\_Y\_1\_Y6\_13

TY3\_WNT5A\_D\_Y\_1\_Y6 TY3\_WNT5A\_D\_Y\_1\_Y6

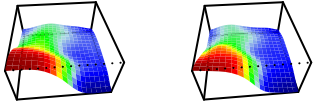

TY2O3P1\_CASIN\_O\_1\_O5\_4

TY2O3P1\_CASIN\_D\_O\_1\_O5 TY2O3P1\_CASIN\_D\_O\_1\_O5

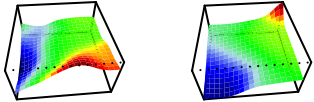

TY1\_WNT5A\_Y\_1\_Y4\_2

TY1\_WNT5A\_D\_Y\_1\_Y4 TY1\_WNT5A\_D\_Y\_1\_Y4

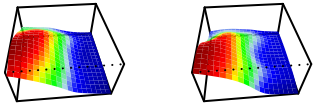

TY2O3P2\_CONTROL\_O\_1\_O5\_6

TY2O3P2\_CONTROL\_D\_O\_1\_O5 TY2O3P2\_CONTROL\_D\_O\_1\_O5

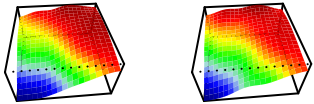

TY1\_CONTROL\_Y\_1\_Y4\_1

TY1\_CONTROL\_D\_Y\_1\_Y4 TY1\_CONTROL\_D\_Y\_1\_Y4

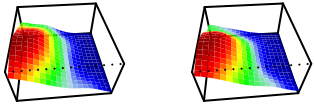

T04\_CONTROL\_O\_1\_O6\_3

T04\_CONTROL\_D\_O\_1\_O6 T04\_CONTROL\_D\_O\_1\_O6

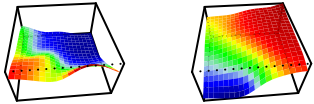

T02\_CONTROL\_O\_1\_O4\_2

T02\_CONTROL\_D\_O\_1\_O4 T02\_CONTROL\_D\_O\_1\_O4

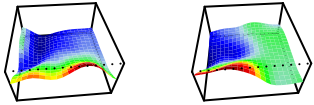

# TO2\_CASIN\_O\_1\_O4\_1

TO2\_CASIN\_D\_O\_1\_O4\_TO2\_CASIN\_D\_O\_1\_O4

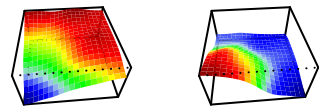

# TY3\_CONTROL\_Y\_1\_Y6\_5

TY3\_CONTROL\_D\_Y\_1\_Y6\_TY3\_CONTROL\_D\_Y\_1\_Y6

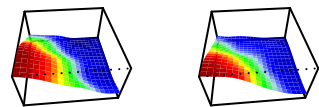

# TO2\_CASIN\_O\_1\_O4\_7

TO2\_CASIN\_D\_O\_1\_O4\_TO2\_CASIN\_D\_O\_1\_O4

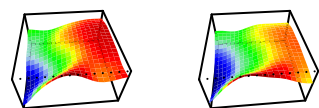

# TY3\_WNT5A\_Y\_1\_Y6\_5

TY3\_WNT5A\_D\_Y\_1\_Y6\_TY3\_WNT5A\_D\_Y\_1\_Y6

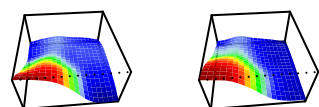

# TY2O3P2\_WNT5A\_Y\_1\_Y5\_2

TY2O3P2\_WNT5A\_D\_Y\_1\_Y5\_TY2O3P2\_WNT5A\_D\_Y\_1\_Y5

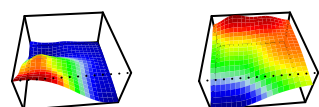

# TO4\_CASIN\_O\_1\_O6\_3

TO4\_CASIN\_D\_O\_1\_O6\_TO4\_CASIN\_D\_O\_1\_O6

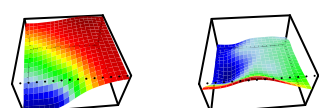

# TY2O3P1\_CASIN\_O\_1\_O5\_5

TY2O3P1\_CASIN\_D\_O\_1\_O5\_TY2O3P1\_CASIN\_D\_O\_1\_O5

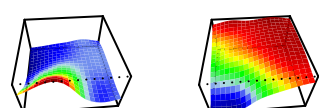

# TY1\_WNT5A\_Y\_1\_Y4\_3

TY1\_WNT5A\_D\_Y\_1\_Y4 TY1\_WNT5A\_D\_Y\_1\_Y4

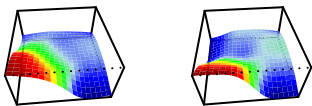

# TY2O3P2\_CONTROL\_O\_1\_O5\_7

O3P2\_CONTROL\_D\_O\_1O3P2\_CONTROL\_D\_O\_1

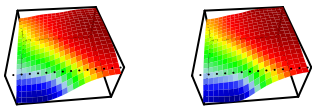

# TY1\_CONTROL\_Y\_1\_Y4\_2

TY1\_CONTROL\_D\_Y\_1\_Y TY1\_CONTROL\_D\_Y\_1\_Y

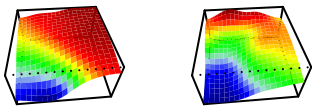

# T04\_CONTROL\_O\_1\_O6\_4

O4\_CONTROL\_D\_O\_1\_OO4\_CONTROL\_D\_O\_1\_O

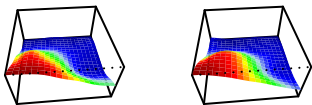

# T02\_CONTROL\_O\_1\_O4\_3

O2\_CONTROL\_D\_O\_1\_OO2\_CONTROL\_D\_O\_1\_O

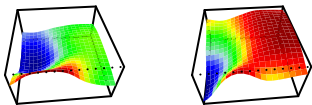

# T02\_CASIN\_O\_1\_O4\_2

TO2\_CASIN\_D\_O\_1\_O4 TO2\_CASIN\_D\_O\_1\_O4

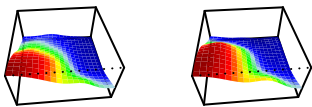

# TY3\_CONTROL\_Y\_1\_Y6\_6

TY3\_CONTROL\_D\_Y\_1\_Y TY3\_CONTROL\_D\_Y\_1\_Y

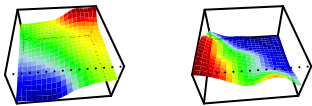

# TO2\_CASIN\_O\_1\_O4\_8

TO2\_CASIN\_D\_O\_1\_O4\_TO2\_CASIN\_D\_O\_1\_O4

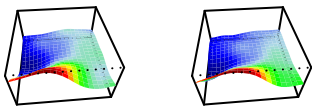

# TY3\_WNT5A\_Y\_1\_Y6\_6

TY3\_WNT5A\_D\_Y\_1\_Y6\_TY3\_WNT5A\_D\_Y\_1\_Y6

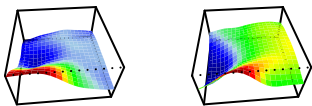

# TY2O3P1\_CONTROL\_Y\_1\_Y5\_1

TY2O3P1\_CONTROL\_D\_Y\_1\_Y5\_TY2O3P1\_CONTROL\_D\_Y\_1\_Y5

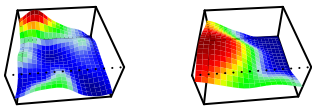

# TY2O3P2\_WNT5A\_Y\_1\_Y5\_3

TY2O3P2\_WNT5A\_D\_Y\_1\_Y5\_TY2O3P2\_WNT5A\_D\_Y\_1\_Y5

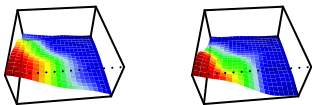

# TO4\_CASIN\_O\_1\_O6\_4

TO4\_CASIN\_D\_O\_1\_O6\_TO4\_CASIN\_D\_O\_1\_O6

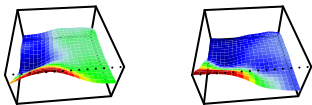

# TY2O3P1\_CASIN\_O\_1\_O5\_6

TY2O3P1\_CASIN\_D\_O\_1\_O5\_TY2O3P1\_CASIN\_D\_O\_1\_O5

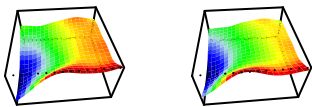

# TY2O3P2\_CONTROL\_O\_1\_O5\_2

TY2O3P2\_CONTROL\_D\_O\_1\_O5\_TY2O3P2\_CONTROL\_D\_O\_1\_O5

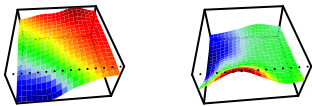

# TY2O3P2\_CONTROL\_O\_1\_O5\_8

O3P2\_CONTROL\_D\_O\_1O3P2\_CONTROL\_D\_O\_1

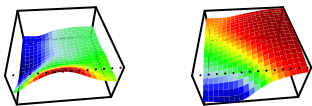

# TY1\_CONTROL\_Y\_1\_Y4\_3

Y1\_CONTROL\_D\_Y\_1\_YY1\_CONTROL\_D\_Y\_1\_Y

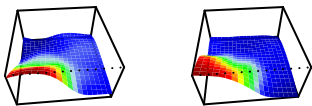

# T04\_CONTROL\_O\_1\_O6\_5

O4\_CONTROL\_D\_O\_1\_OO4\_CONTROL\_D\_O\_1\_O

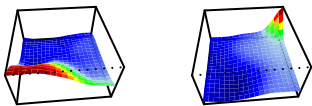

# T02\_CONTROL\_O\_1\_O4\_4

O2\_CONTROL\_D\_O\_1\_OO2\_CONTROL\_D\_O\_1\_O

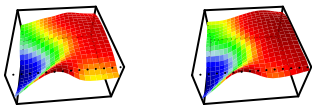

# T02\_CASIN\_O\_1\_O4\_3

TO2\_CASIN\_D\_O\_1\_O4\_TO2\_CASIN\_D\_O\_1\_O4

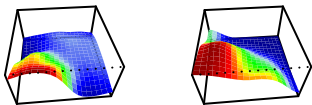

# TY3\_CONTROL\_Y\_1\_Y6\_9

Y3\_CONTROL\_D\_Y\_1\_YY3\_CONTROL\_D\_Y\_1\_Y

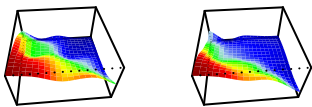

# T02\_CASIN\_O\_1\_O4\_9

TO2\_CASIN\_D\_O\_1\_O4\_TO2\_CASIN\_D\_O\_1\_O4

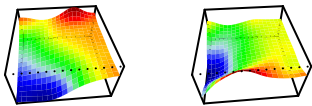

TY3\_WNT5A\_Y\_1\_Y6\_7

TY3\_WNT5A\_D\_Y\_1\_Y6 TY3\_WNT5A\_D\_Y\_1\_Y6

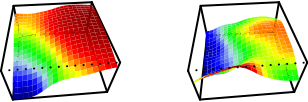

TY2O3P1\_CONTROL\_Y\_1\_Y5\_2

TY2O3P1\_CONTROL\_D\_Y\_1\_Y5 TY2O3P1\_CONTROL\_D\_Y\_1\_Y5

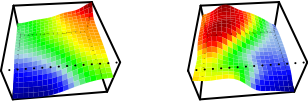

TY2O3P2\_WNT5A\_Y\_1\_Y5\_4

TY2O3P2\_WNT5A\_D\_Y\_1\_Y5 TY2O3P2\_WNT5A\_D\_Y\_1\_Y5

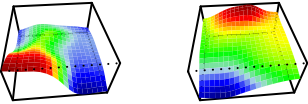

TO4\_CASIN\_O\_1\_O6\_5

TO4\_CASIN\_D\_O\_1\_O6 TO4\_CASIN\_D\_O\_1\_O6

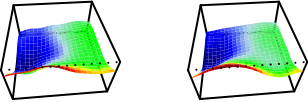

Supplement: Supplementary file [file 1]
