# Supplementary material
Source: publisher figshare collection journal article supplement (https://plos.figshare.com/articles/dataset/_/7111907)

3a1 | A=red, B=blue

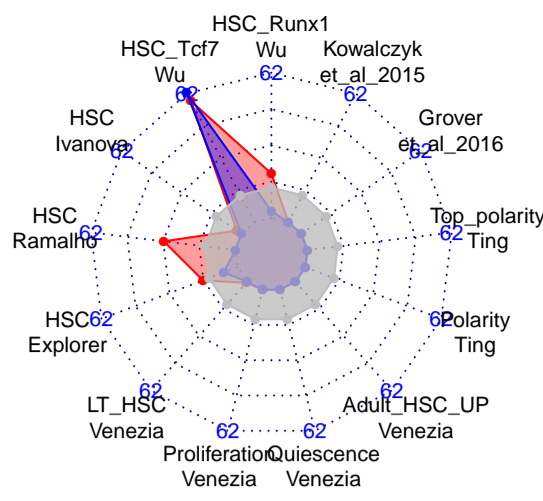

3a2 | A=red, B=blue

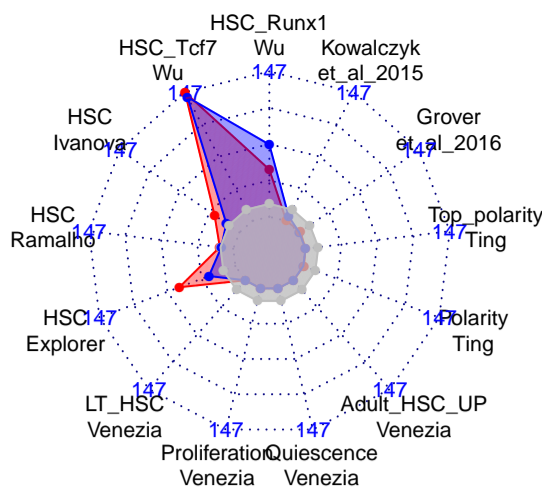

3y1 | A=red, B=blue

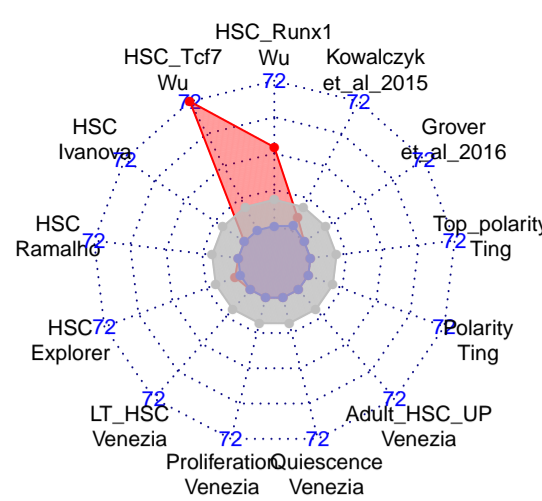

3y2 | A=red, B=blue

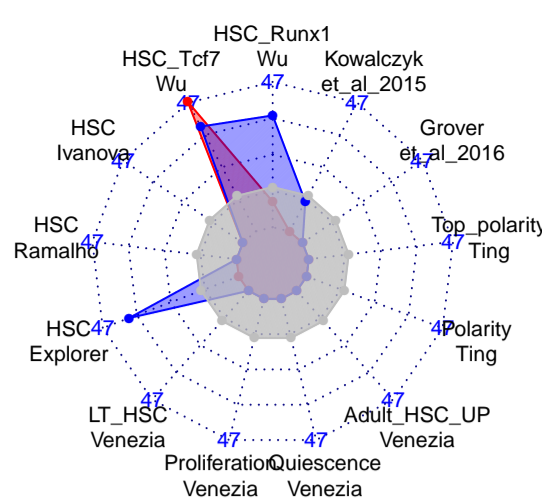

3a3 | A=red, B=blue

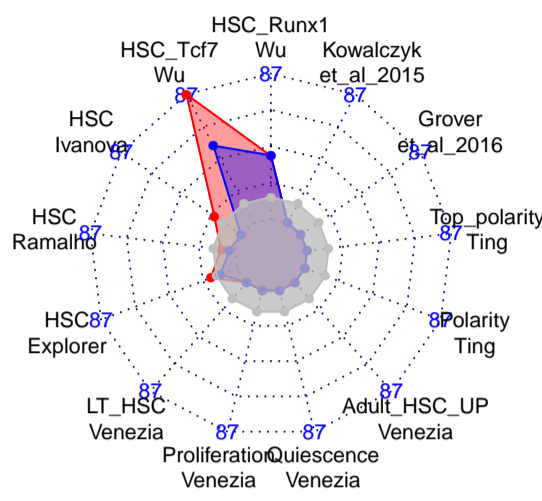

3a4 | A=red, B=blue

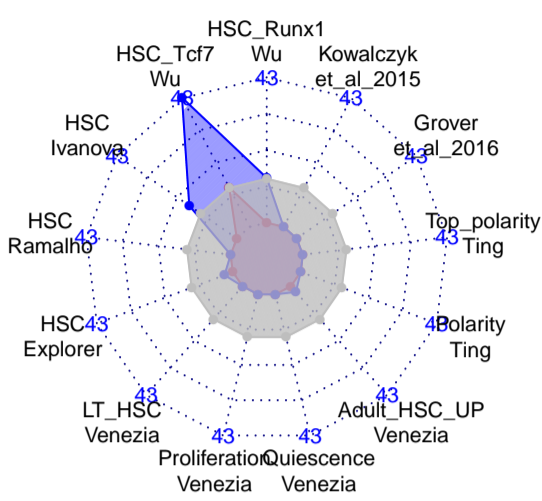

3y3 | A=red, B=blue

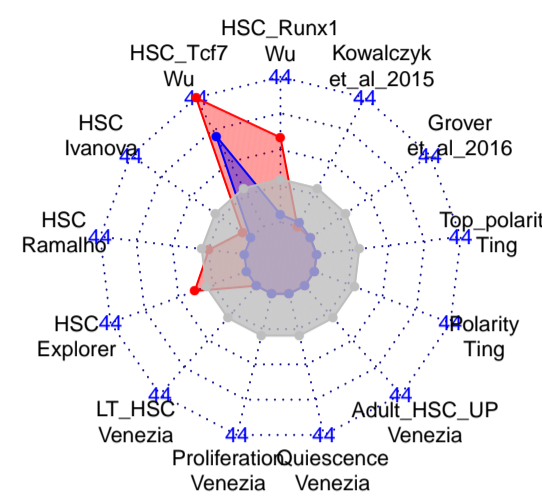

3y4 | A=red, B=blue

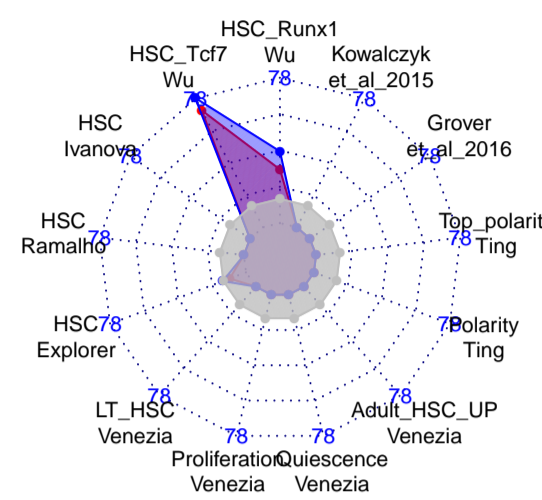

3a5 | A=red, B=blue

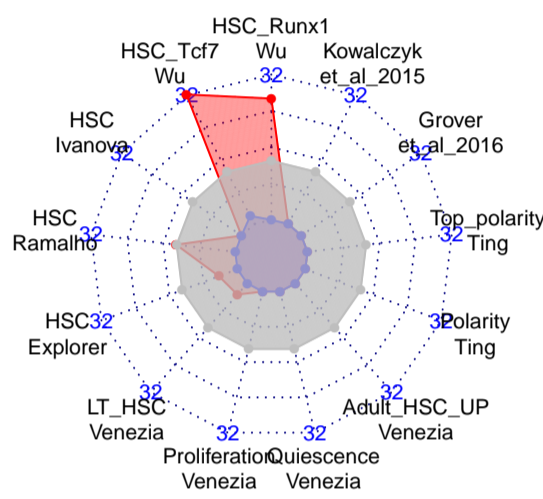

3y5 | A=red, B=blue

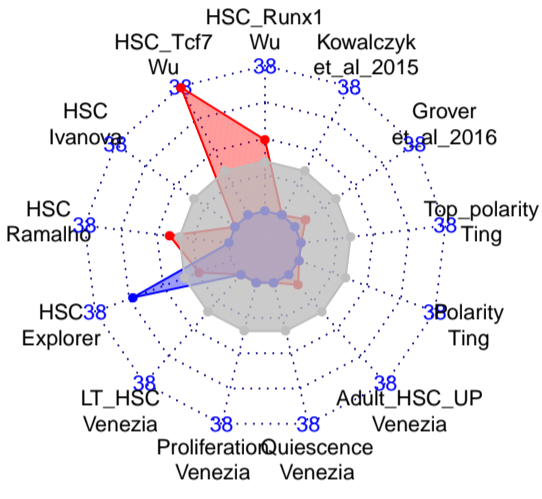

3y6 | A=red, B=blue

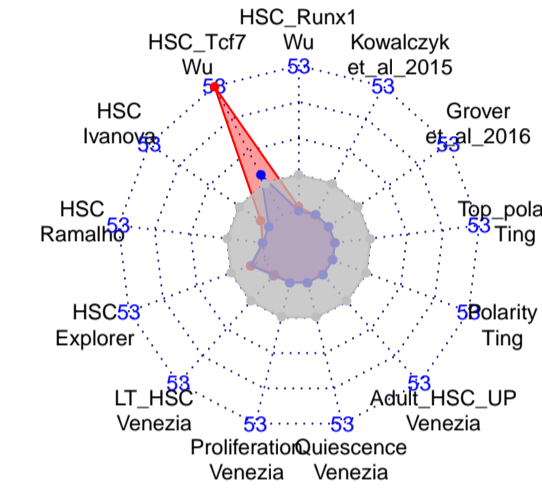

4a6 | A=red, B=blue

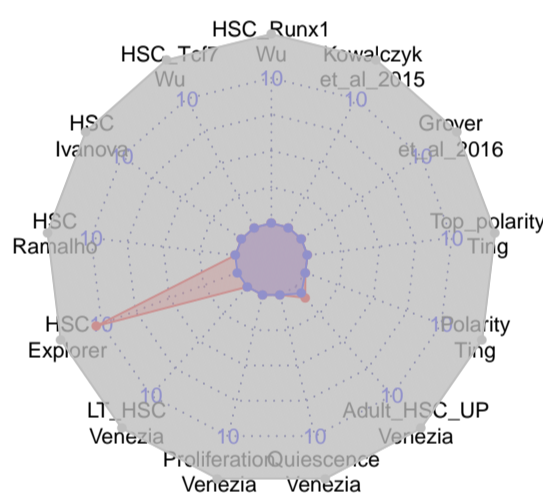

4a8 | A=red, B=blue

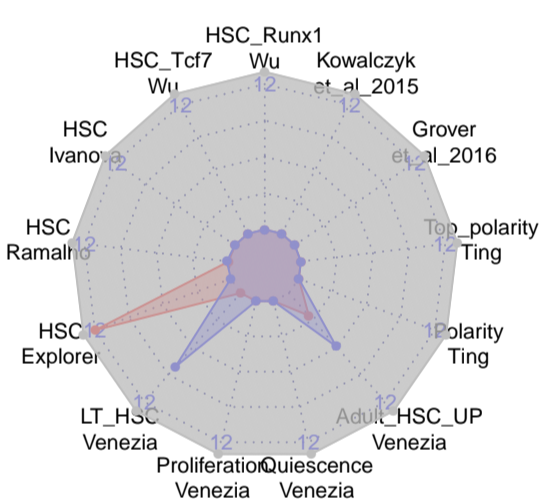

3y7 | A=red, B=blue

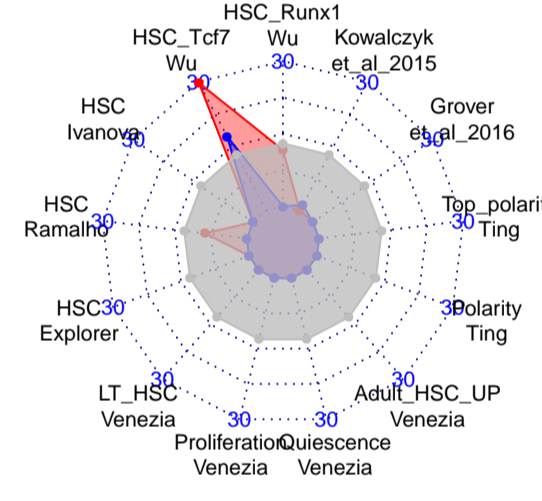

3y8 | A=red, B=blue

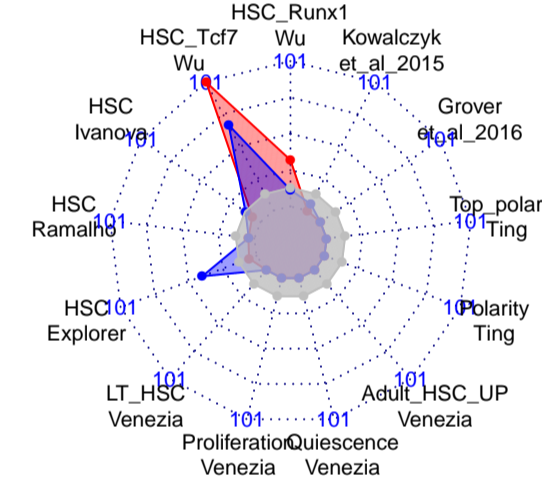

4a10 | A=red, B=blue

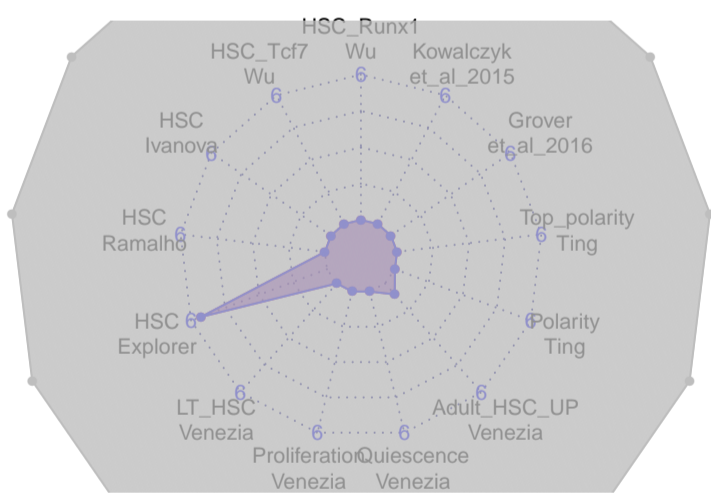

4a11 | A=red, B=blue

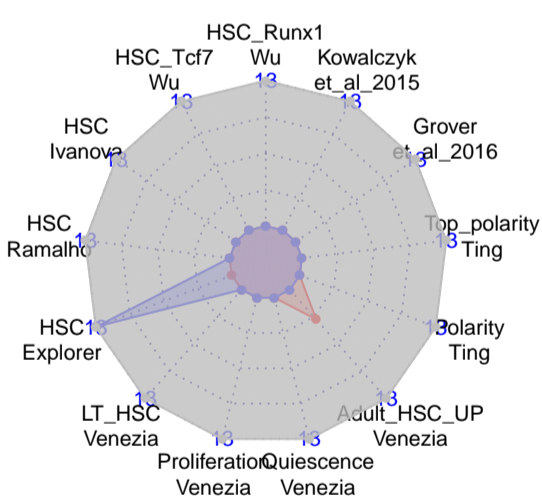

4y1 | A=red, B=blue

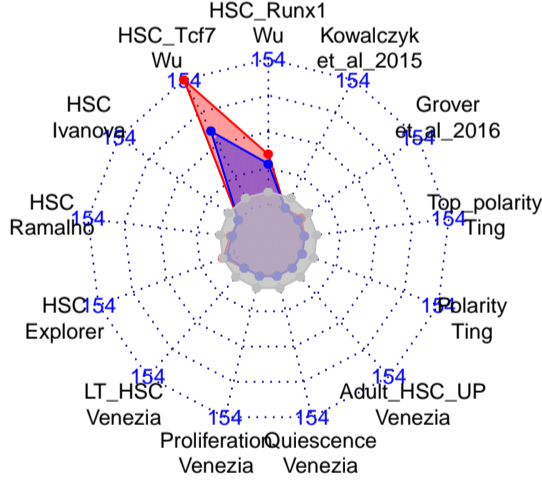

4y2 | A=red, B=blue

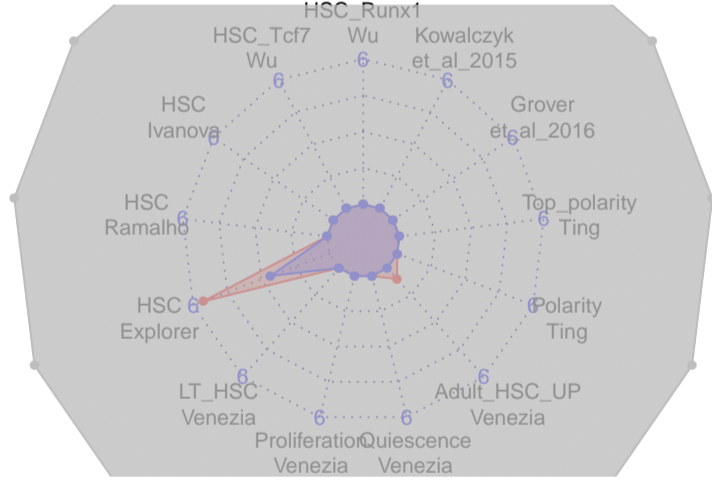

4a12 | A=red, B=blue

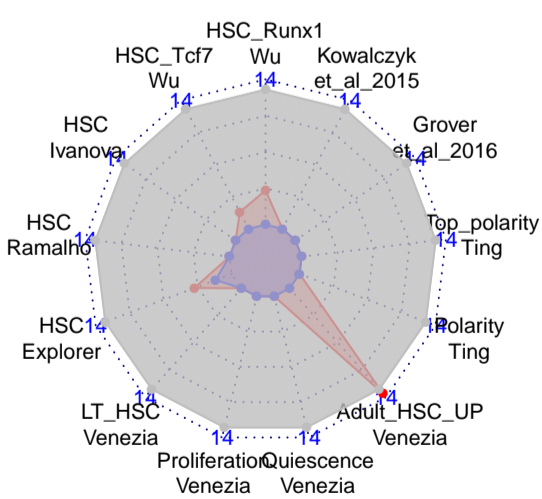

4y3 | A=red, B=blue

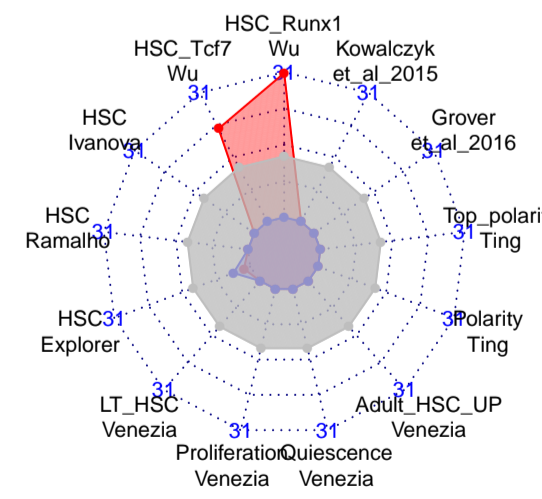

4y5 | A=red, B=blue

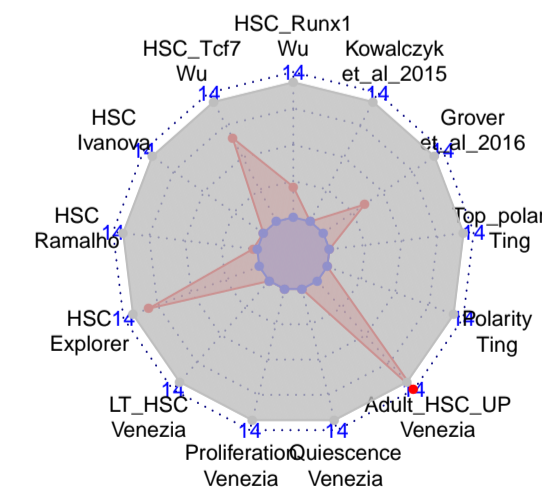

5y5 | A=red, B=blue

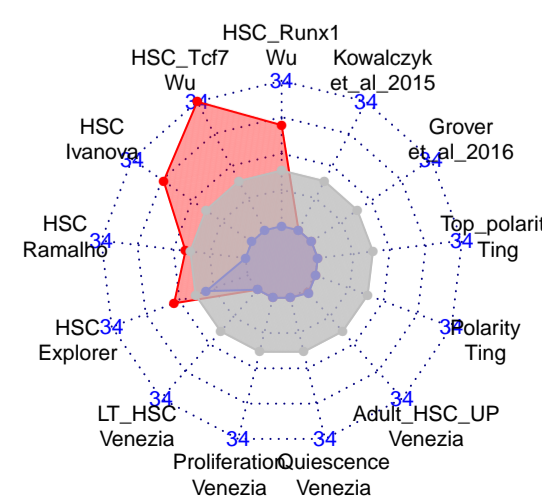

5y6 | A=red, B=blue

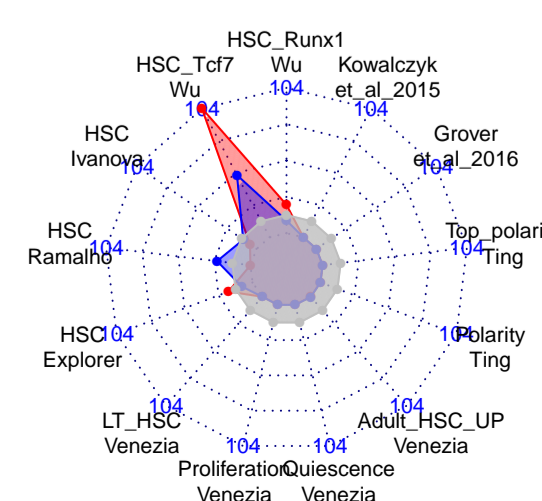

Supplement: Supplementary file [file 1]
