# Supplementary material
Source: publisher figshare collection journal article supplement (https://plos.figshare.com/articles/dataset/_/7111907)
Supplement: Supplementary file [file 1]

Image5

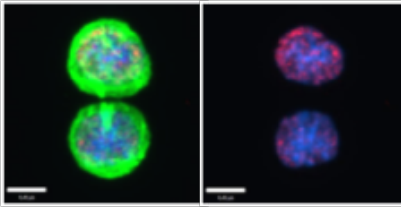

Image7

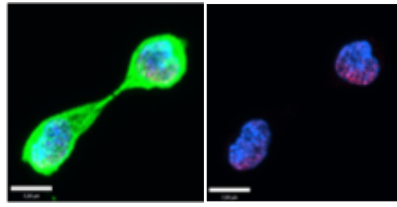

Image9

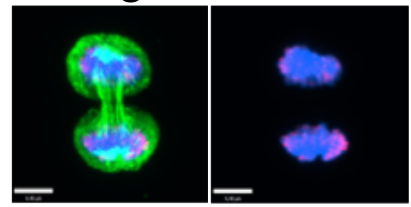

Image11

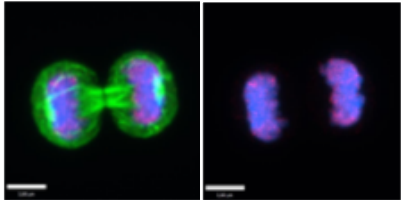

Image13

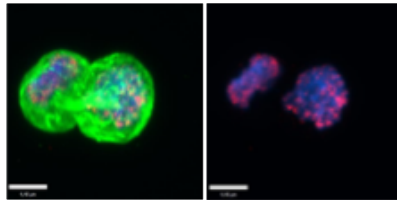

Image15

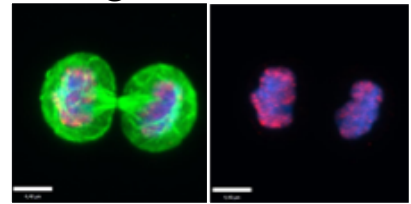

Image17

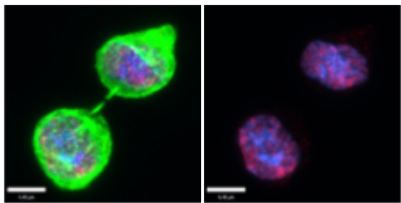

Image19

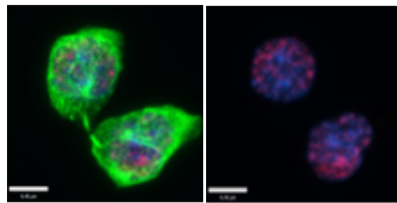

Image21

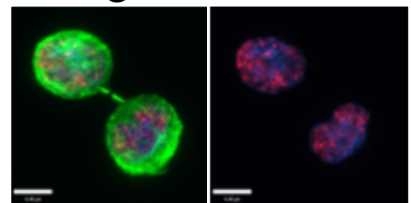

Image23

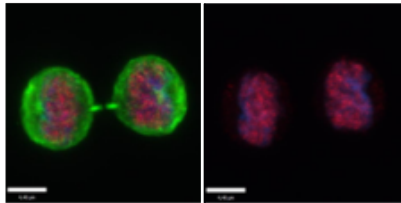

Image25

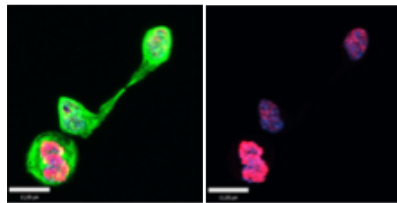

Image27

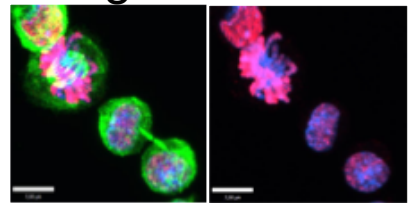

Image29

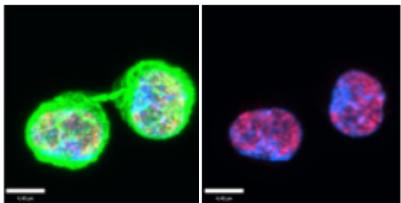

Image31

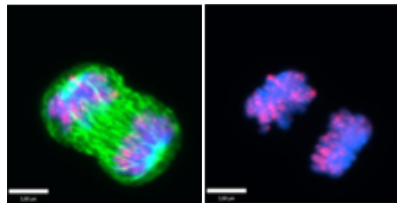

Image33

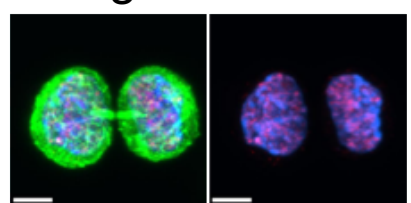

Image35

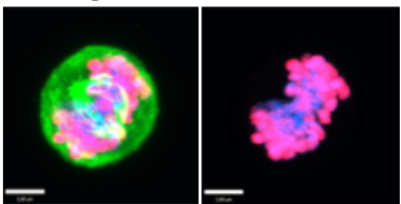

Young ctr; acH4k16 (red), tubulin (green), DAPI (blue);  
exp#1

Image37

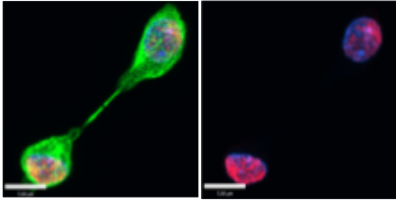

Image41

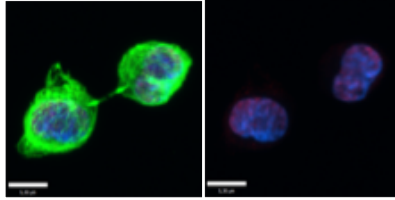

Image43

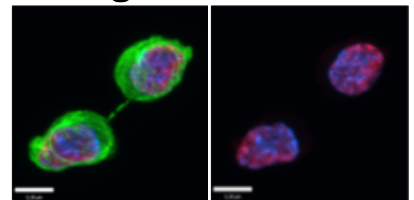

Image47

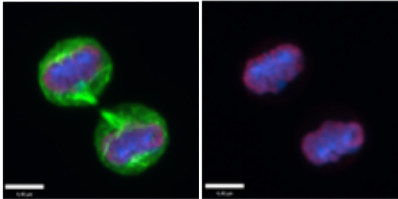

Image49

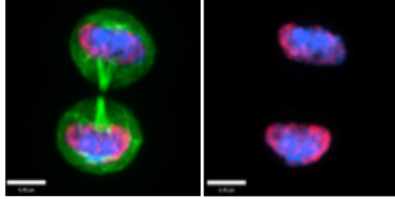

Image51

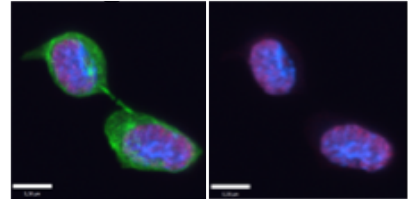

Image53

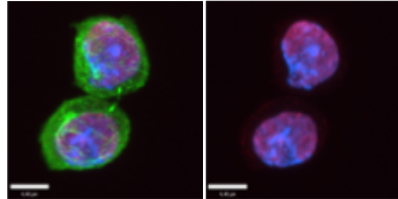

Image55

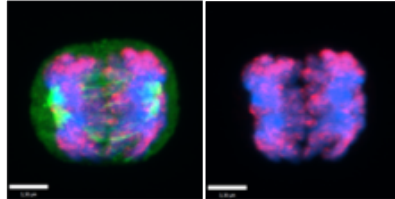

Image57

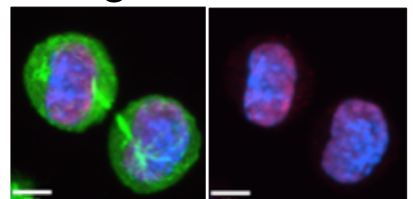

Image59

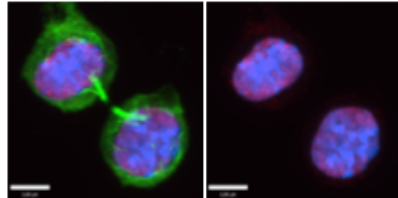

Image61

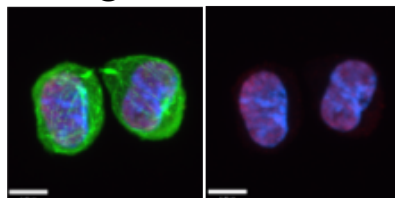

Image39

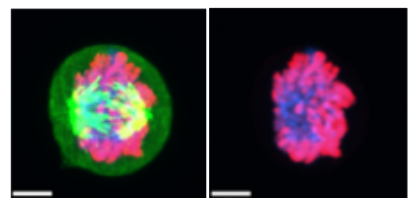

Aged ctr; acH4k16 (red), tubulin (green), DAPI (blue);  
exp#1

Image63

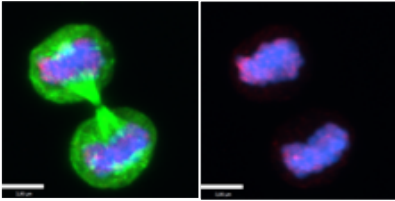

Image65

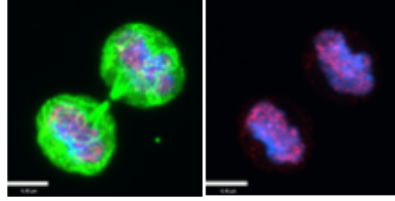

Image67

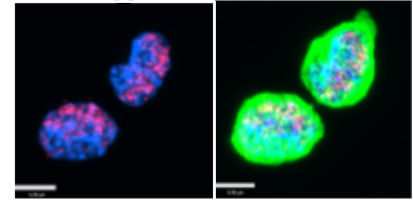

Image69

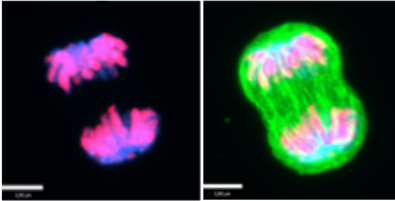

Image71

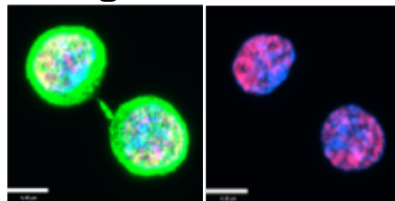

Image73

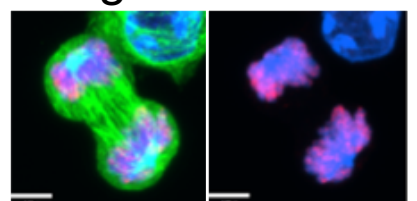

Image75

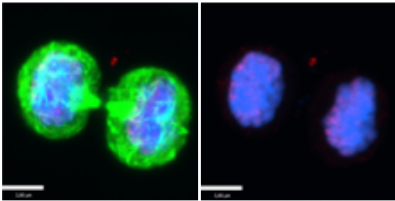

Image77

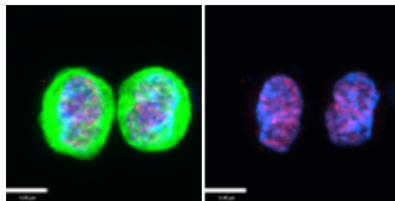

Image79

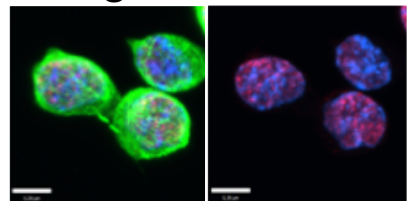

Young+Wnt5a 100ng/ml; acH4k16 (red), tubulin (green),  
DAPI (blue);  
exp#1

Image83

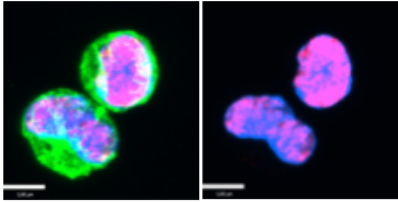

Image85

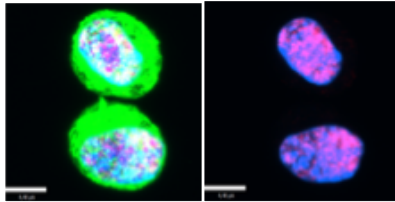

Image87

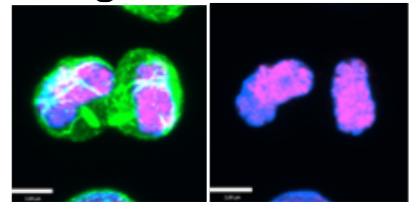

Image89

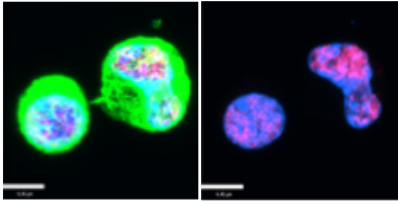

Image91

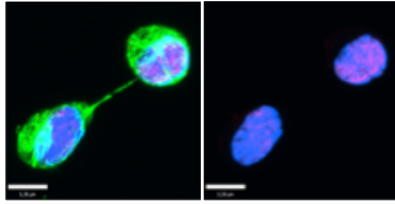

Aged+CASIN5 $\mu$ M; acH4k16 (red), tubulin (green), DAPI  
(blue);  
exp#1

Image4

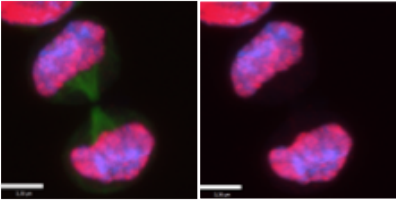

Image7

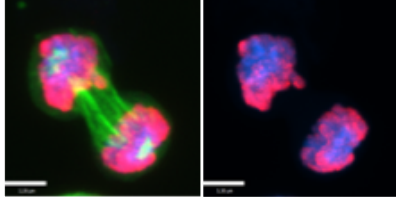

Image10

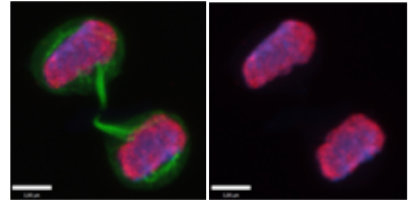

Image15

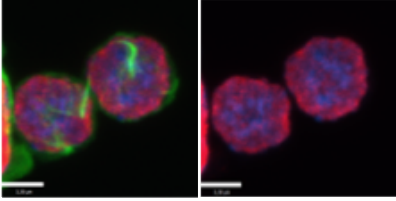

Image17

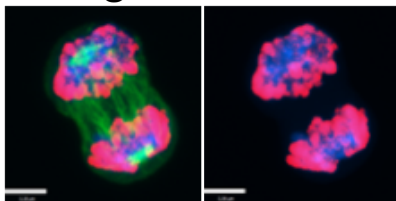

Image19

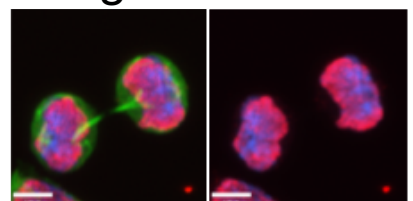

Image21

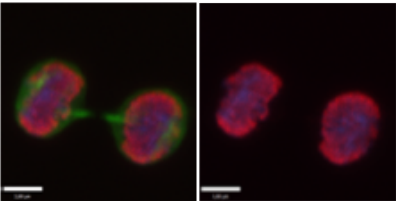

Image23

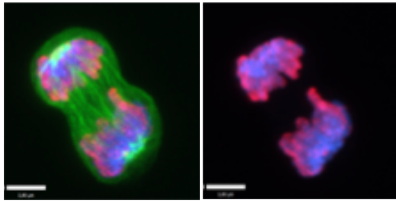

Image25

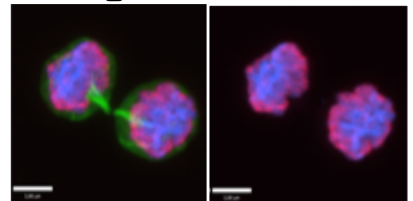

Image27

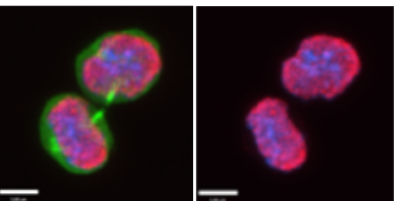

Image29

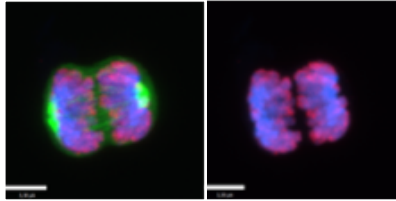

Image53

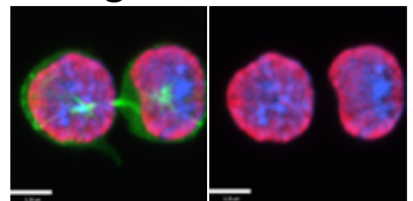

Image55

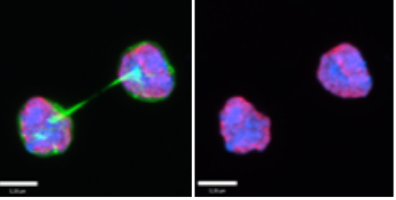

Image59

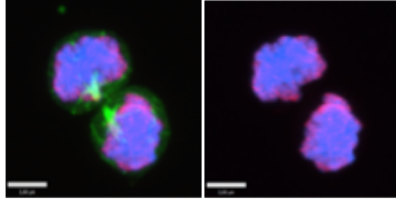

Image61

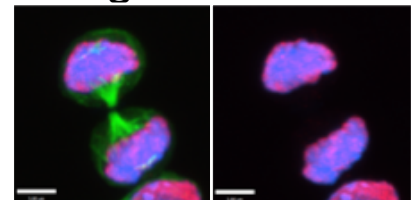

Image63

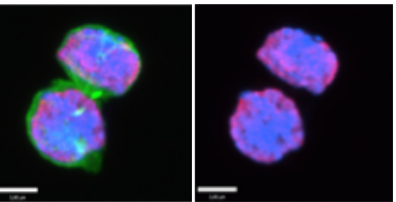

Young ctr; acH4k16 (red), tubulin (green), DAPI (blue);  
exp#2

Image3

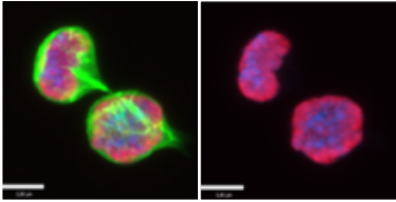

Image5

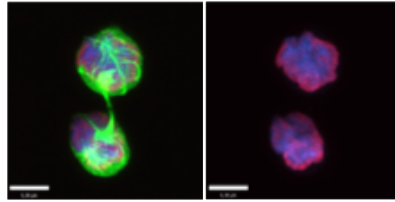

Image7

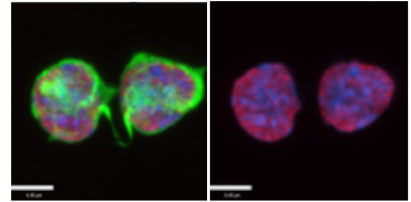

Image9

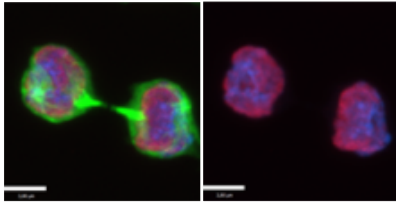

Image11

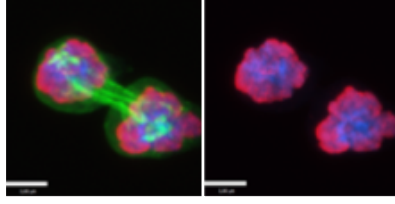

Image13

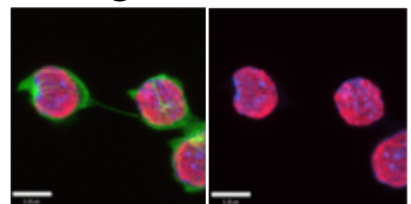

Image15

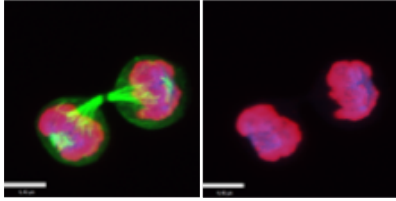

Image20

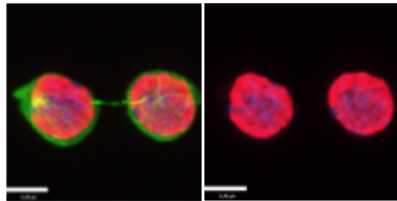

Image22

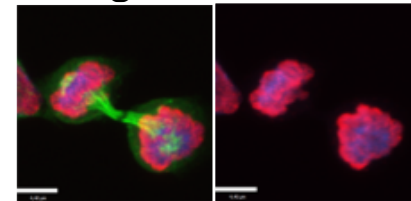

Image24

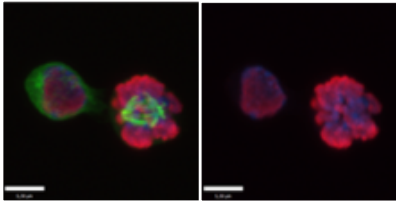

Image26

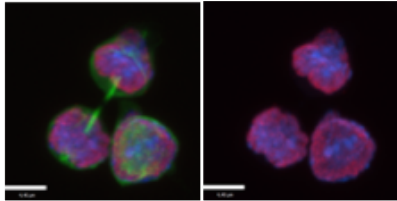

Image28

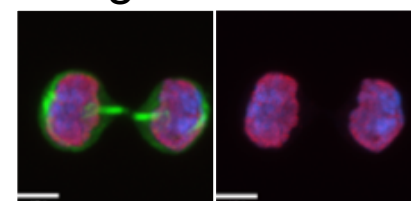

Image30

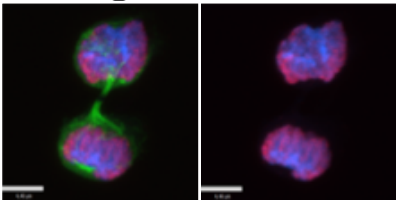

Image33

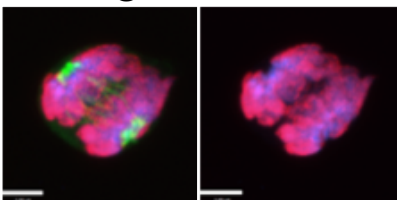

Image35

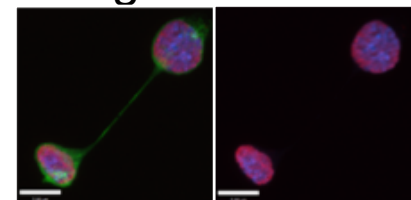

Image37

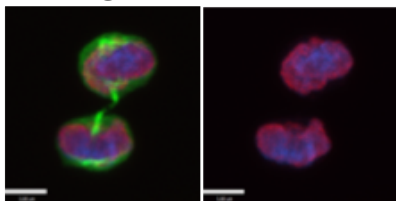

Image40

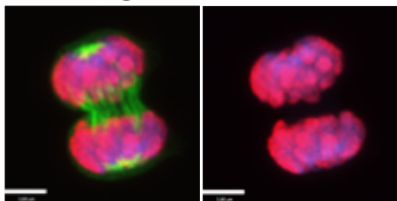

Image42

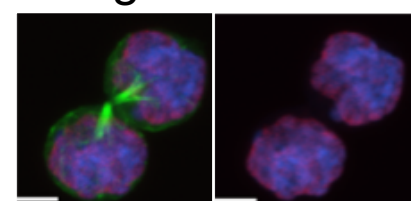

Image44

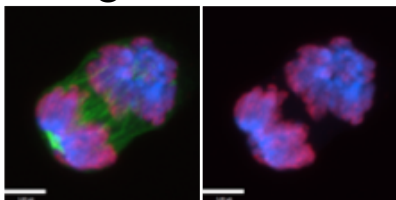

Image62

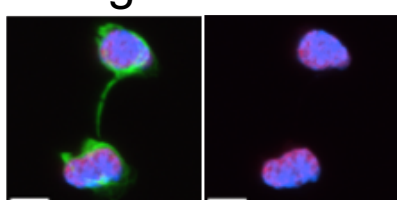

Aged ctr; acH4k16 (red), tubulin (green), DAPI (blue);  
exp#2

Image2

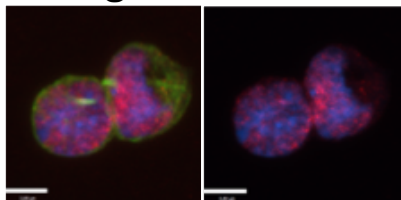

Image4

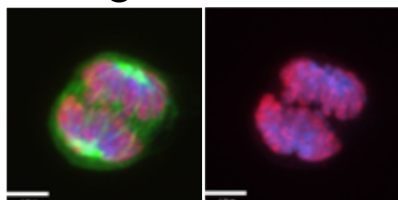

Image7

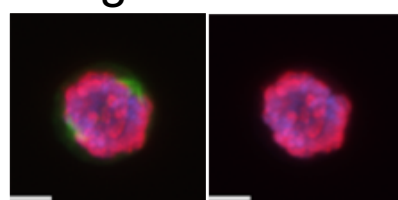

Image9

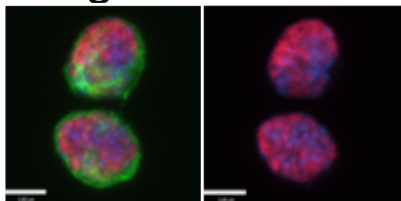

Image11

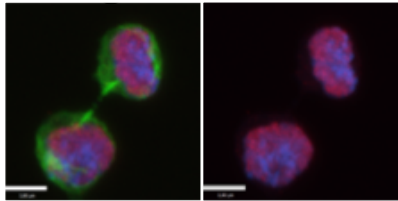

Image13

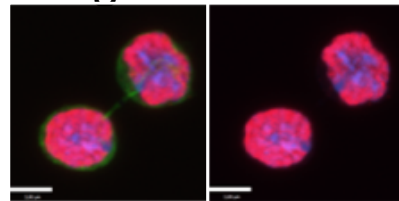

Image15

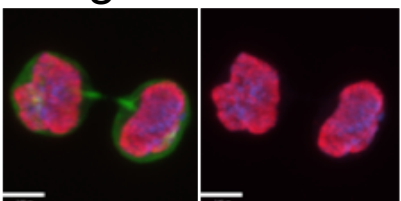

Image19

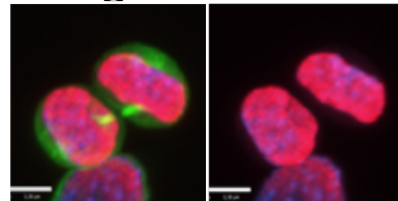

Image21

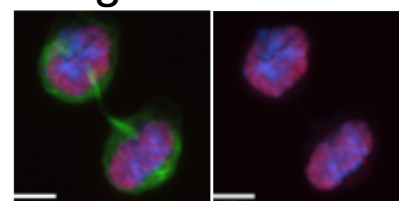

Image27

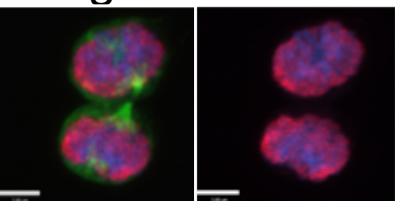

Image29

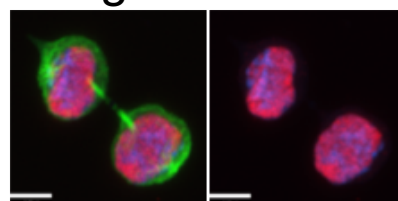

Image31

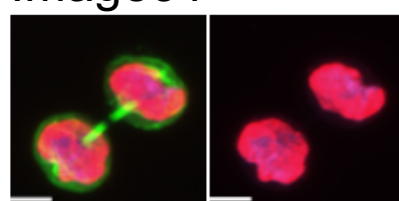

Image47

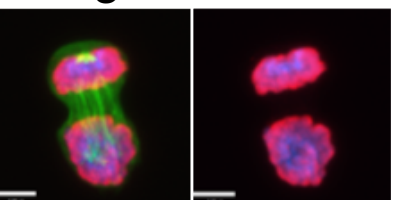

Image49

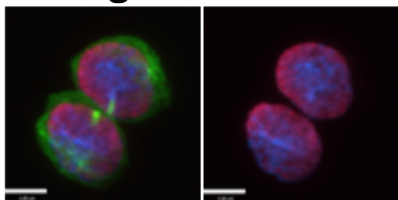

Image51

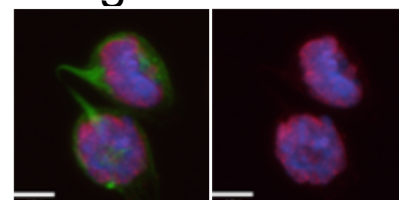

Image53

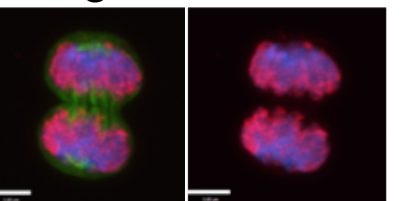

Image55

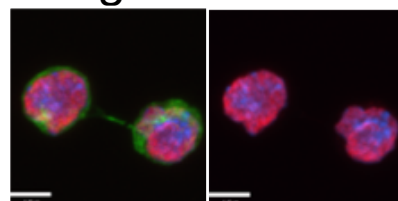

Image57

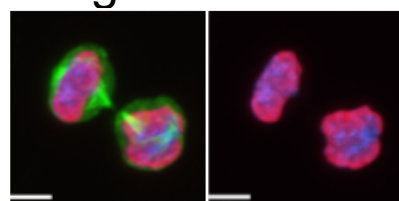

Image59

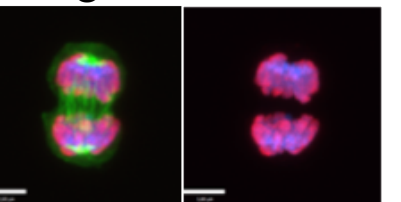

Image61

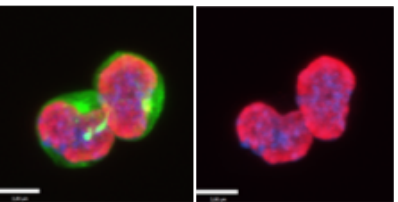

Aged+CASIN5 $\mu$ M; acH4k16 (red), tubulin (green), DAPI (blue);  
exp#2

Image7

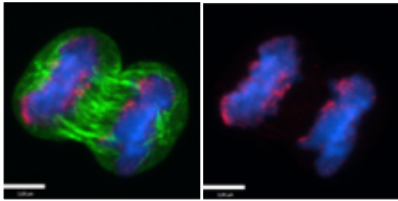

Image9

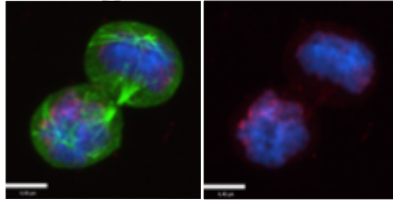

Image11

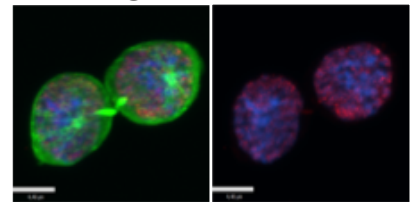

Image13

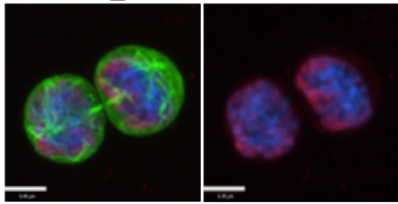

Image15

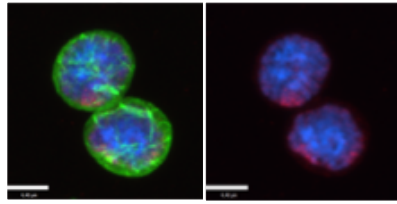

Image17

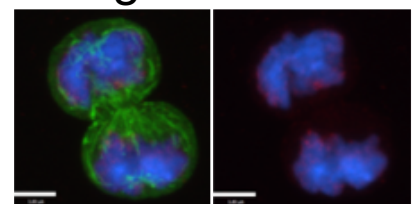

Image19

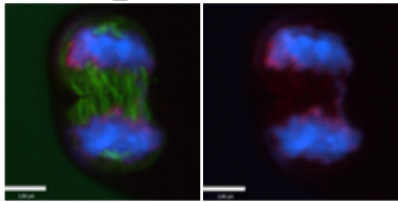

Image21

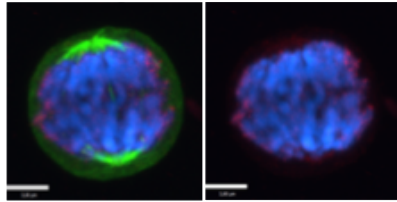

Image23

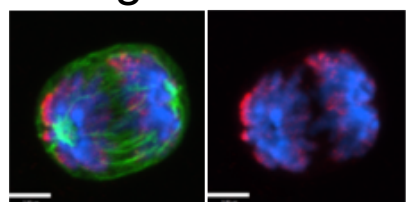

Image25

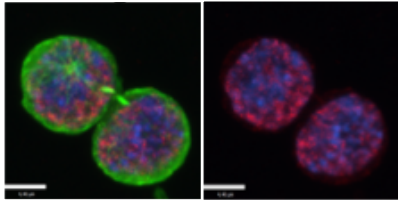

Image27

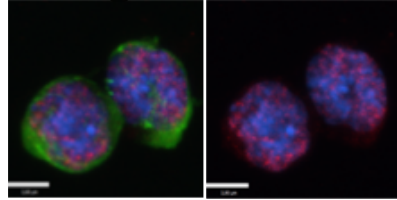

Image29

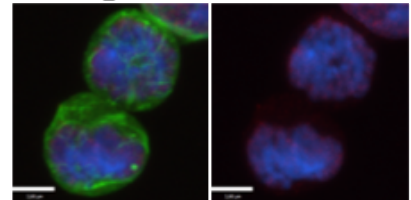

Image31

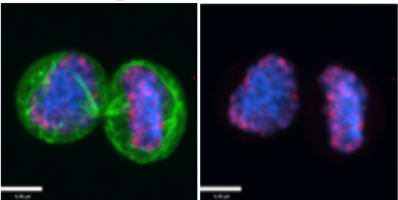

Image33

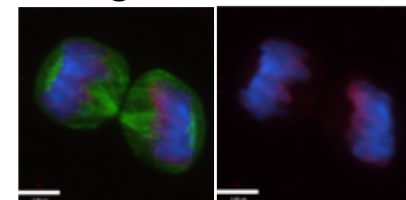

Image35

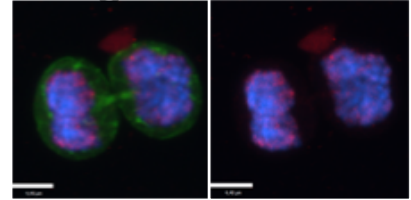

Young ctr; acH4k16 (red), tubulin (green), DAPI (blue);  
exp#3

Image2

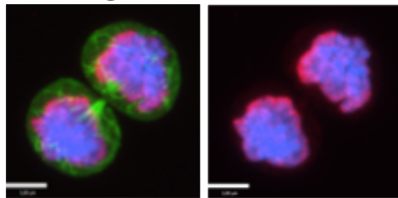

Image4

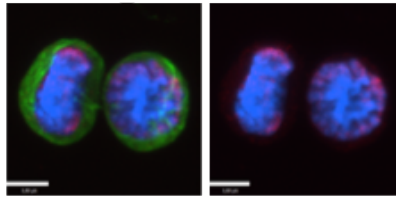

Image6

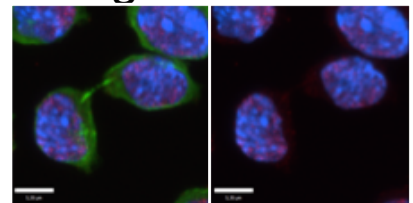

Image8

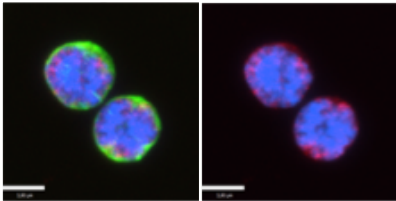

Image11

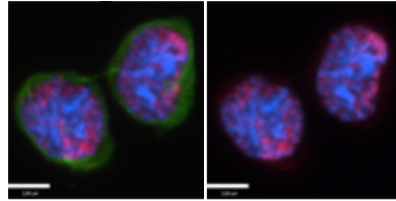

Image13

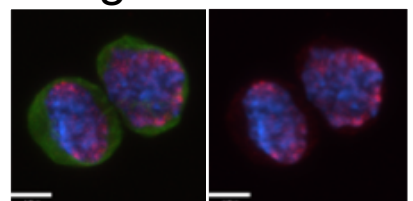

Image17

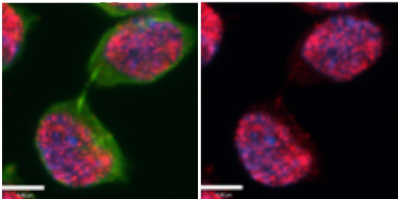

Image21

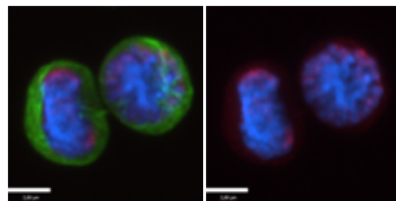

Image37

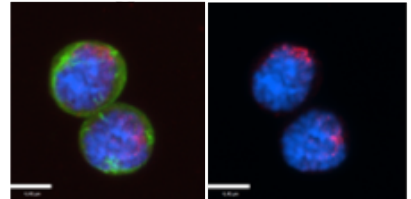

Image41

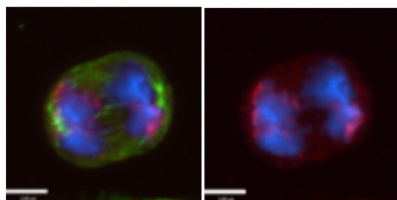

Image32

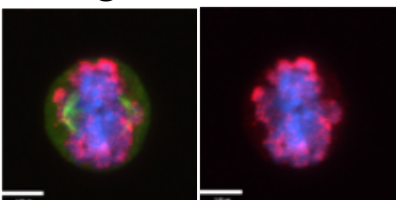

Image45

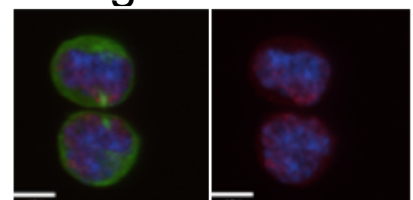

Image47

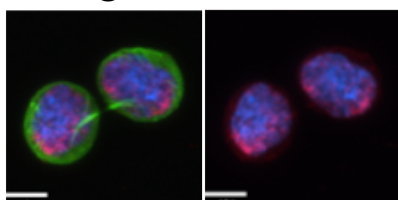

Image43

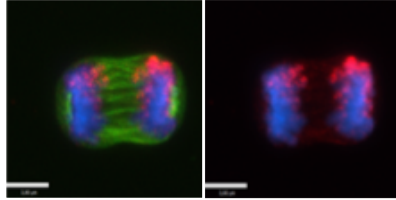

Image49

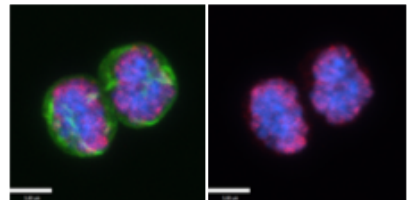

Young+Wnt5a 100ng/ml; acH4k16 (red), tubulin (green),  
DAPI (blue);  
exp#3

Image37

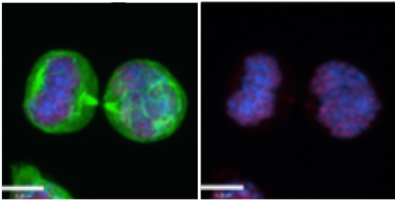

Image39

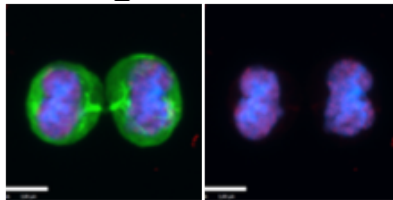

Image41

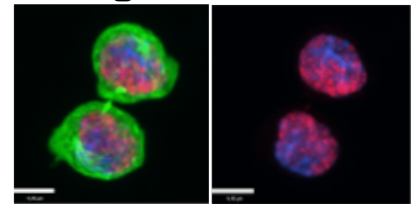

Image43

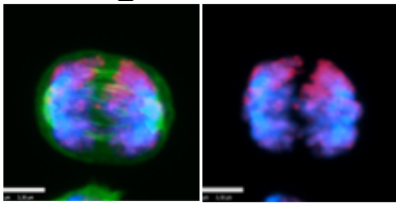

Image45

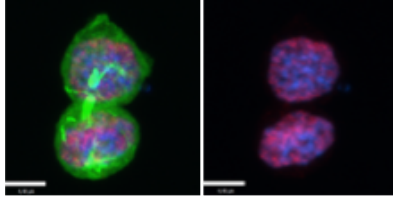

Image47

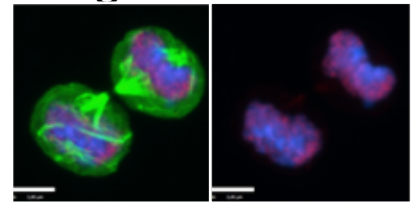

Image49

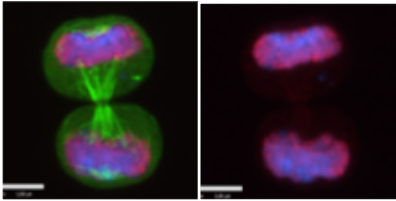

Image53

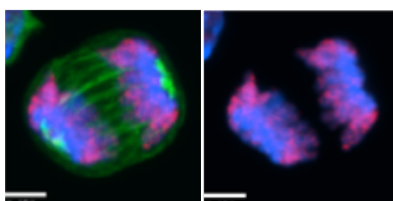

Image55

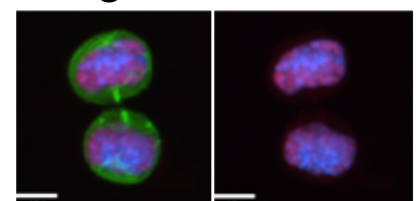

Image57

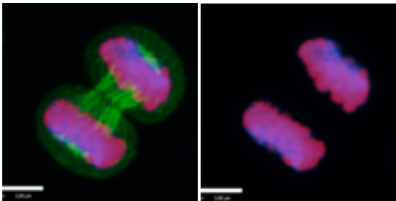

Aged ctr; acH4k16 (red), tubulin (green), DAPI (blue);  
exp#3

Image59

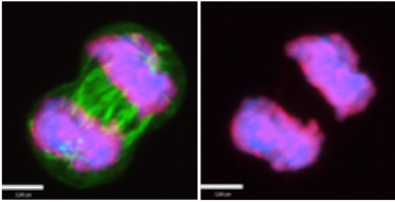

Image61

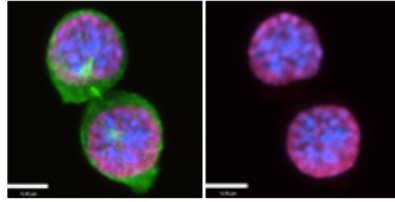

Image63

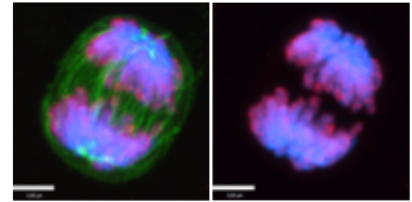

Image65

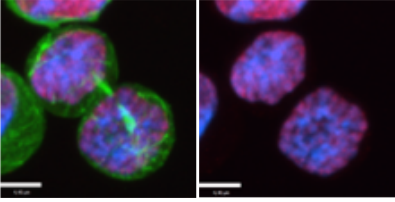

Image67

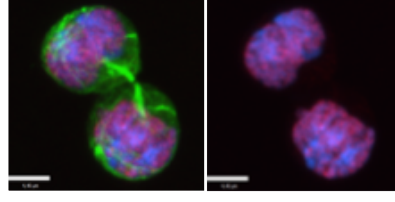

Image69

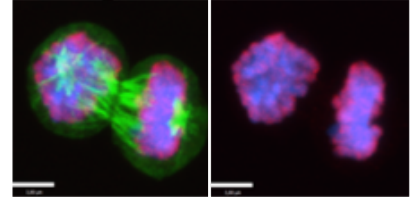

Image71

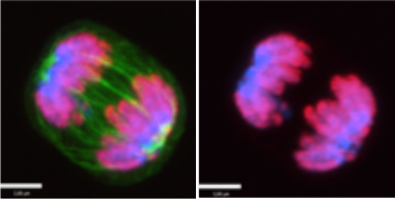

Image73

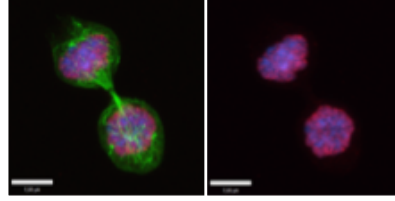

Image75

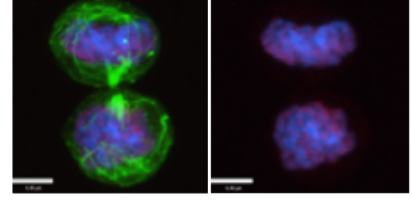

Image78

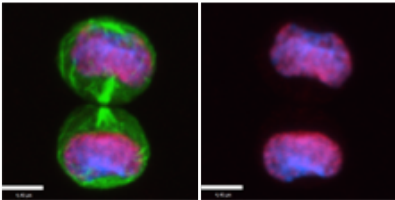

Image80

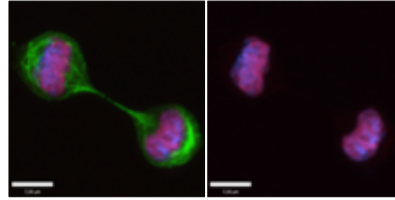

Image82

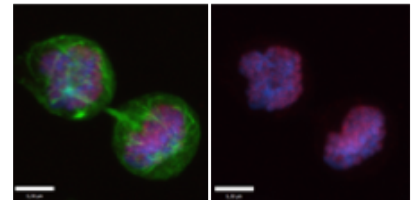

Image84

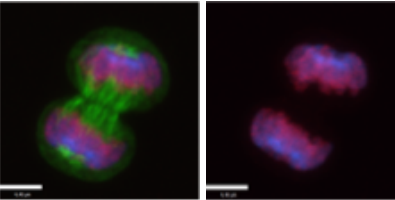

Image86

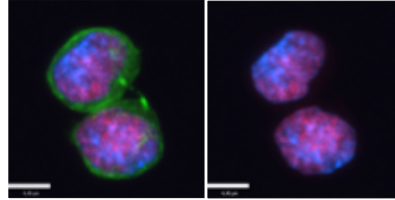

Aged+CASIN5 $\mu$ M; acH4k16 (red), tubulin (green), DAPI (blue);  
exp#3

Image3

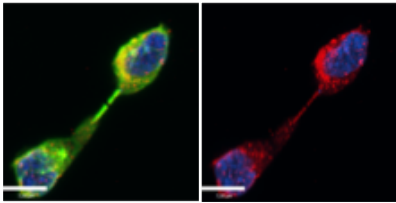

Image7

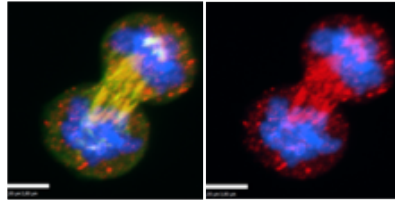

Image9

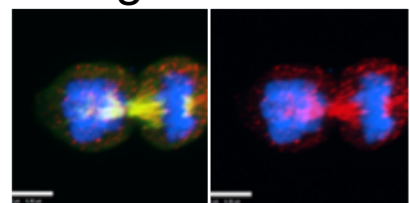

Image18

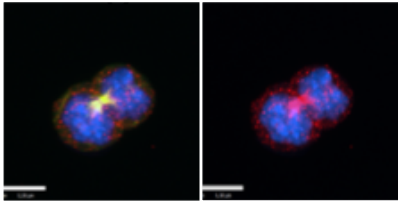

Image20

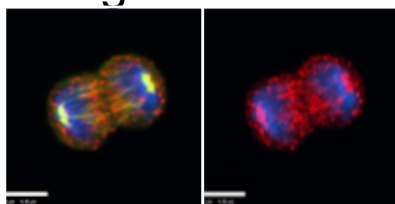

Image22

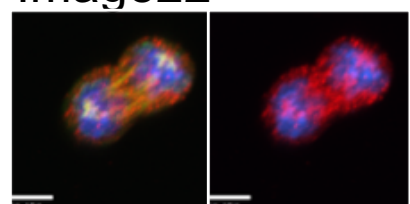

Image26

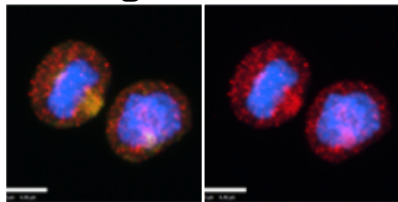

Image28

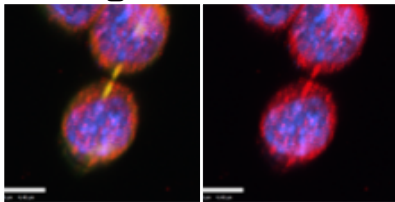

Image31

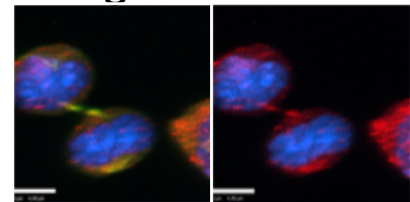

Image33

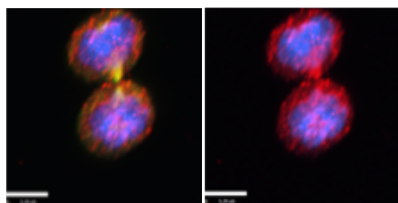

Young ctr; Cdc42 (red), tubulin (green), DAPI (blue);  
exp#1

Image46

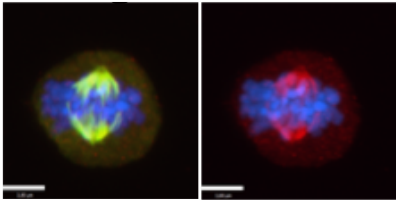

Image48

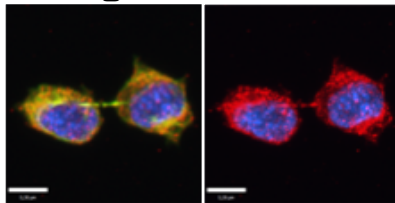

Image50

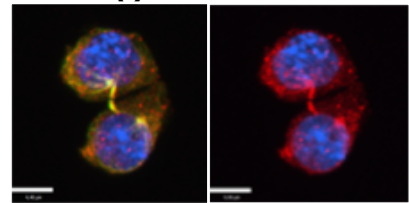

Image52

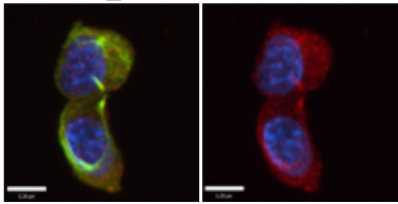

Image54

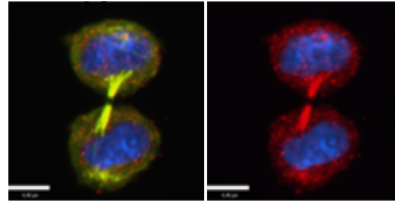

Image58

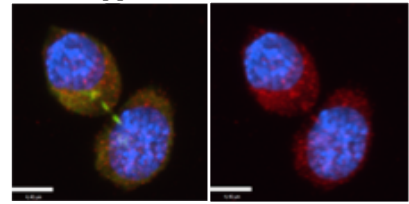

Image60

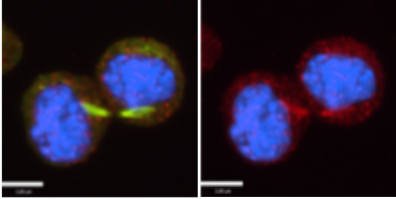

Image62

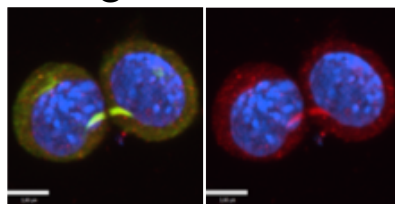

Image64

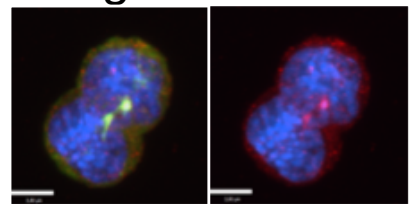

Image66

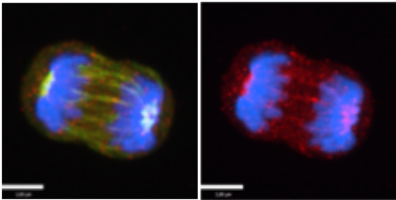

Image68

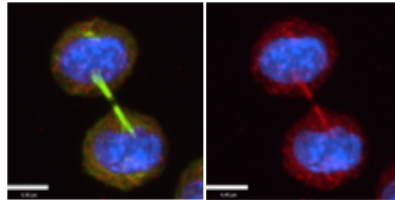

Aged ctr; Cdc42 (red), tubulin (green), DAPI (blue);  
exp#1

Image2

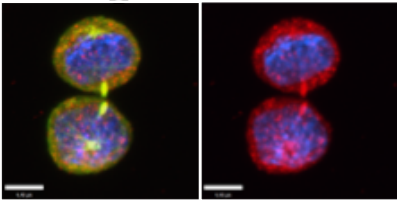

Image4

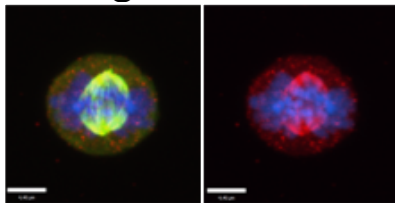

Image6

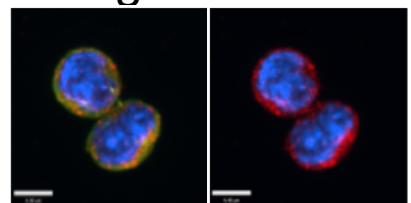

Image8

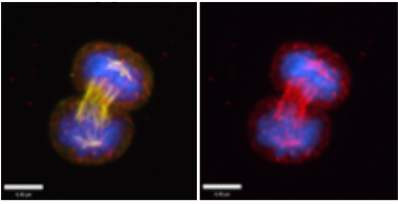

Image10

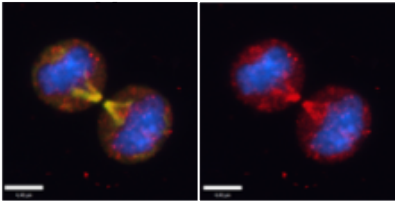

Image12

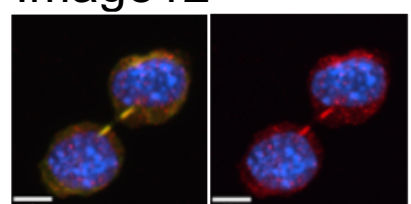

Image14

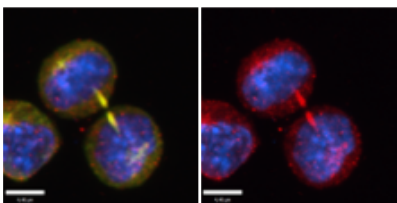

Image16

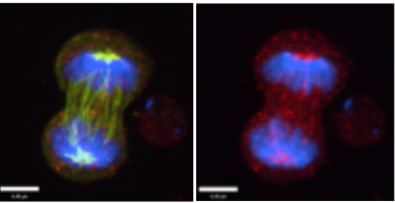

Image20

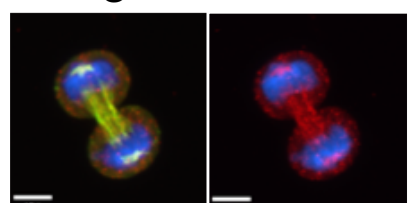

Image22

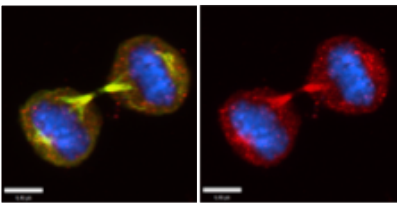

Young+Wnt5a 100ng/ml; Cdc42 (red), tubulin (green), DAPI (blue);  
exp#1

Image3

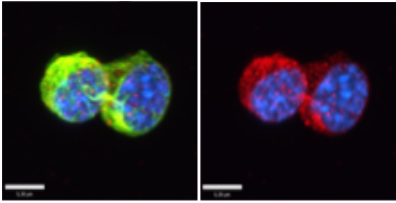

Image5

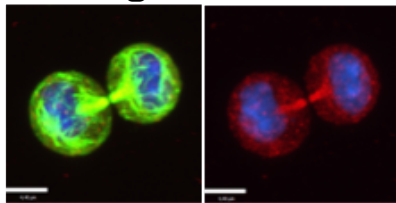

Image7

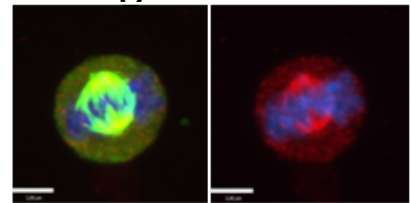

Image9

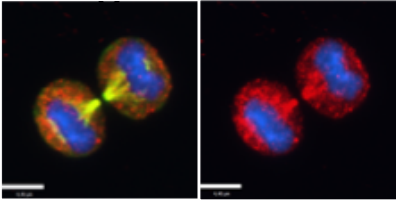

Image11

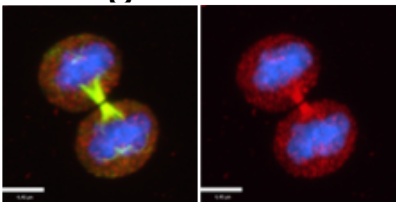

Image13

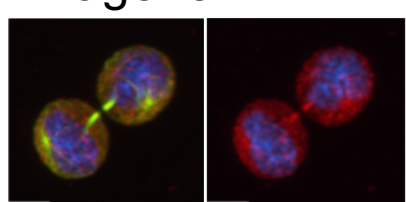

Image15

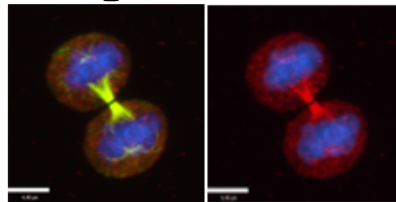

Image17

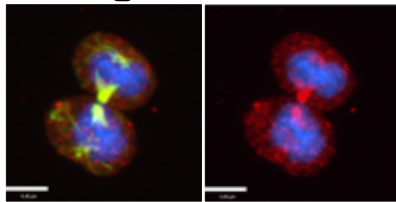

Image19

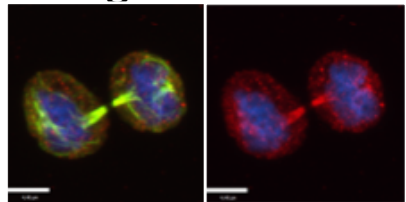

Image21

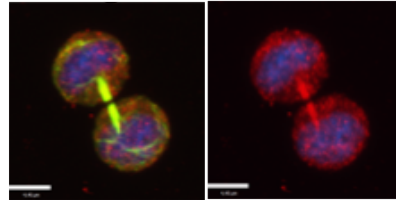

Aged+CASIN 5 $\mu$ M; Cdc42 (red), tubulin (green), DAPI (blue);  
exp#1

Image11

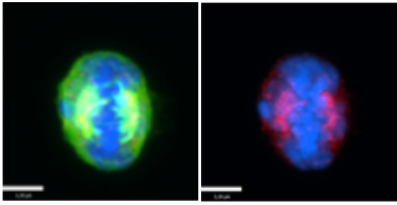

Image13

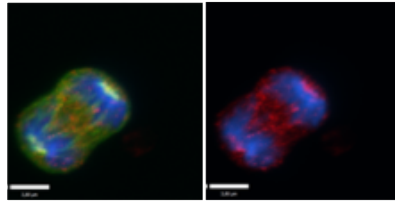

Image15

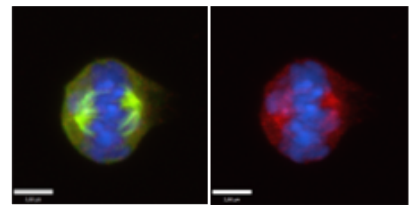

Image33

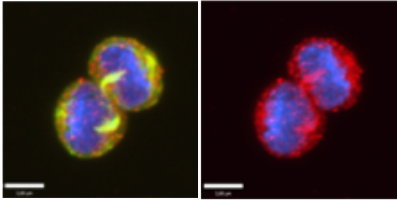

Image61

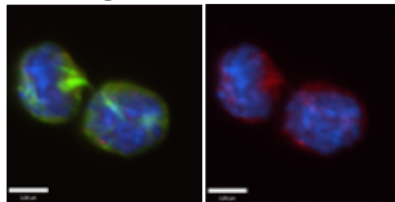

Image37

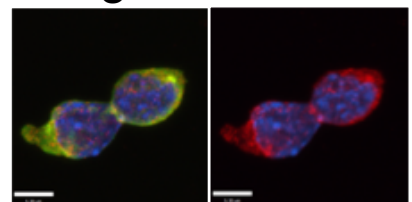

Image39

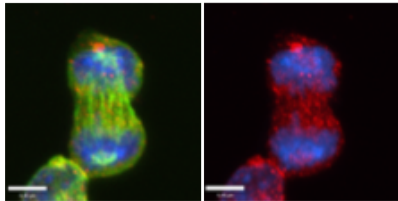

Image41

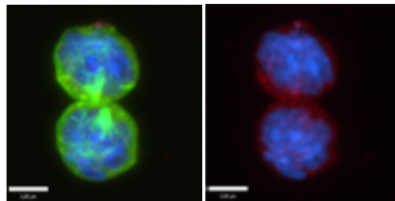

Image43

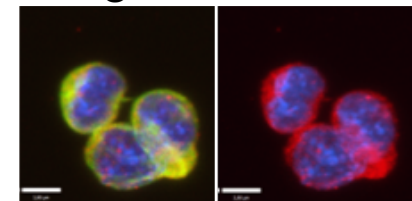

Image63

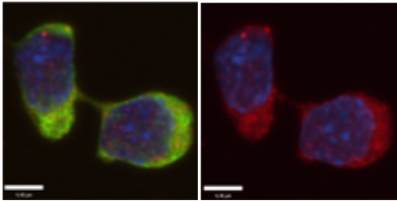

Image47

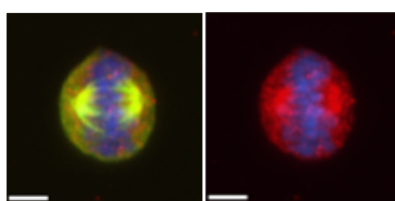

Image49

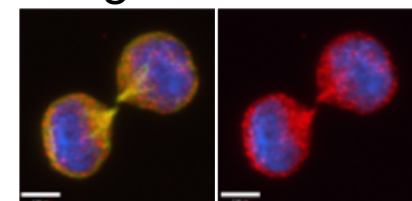

Image51

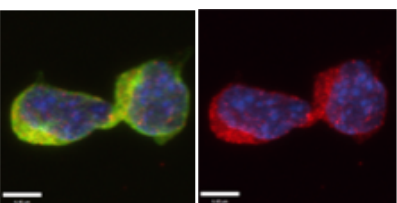

Image53

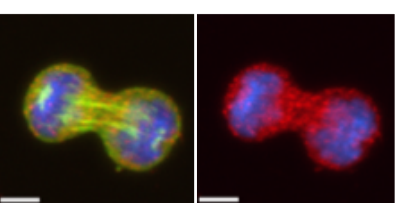

Image55

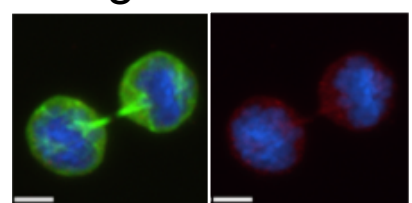

Image57

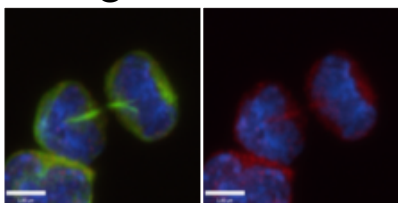

Image59

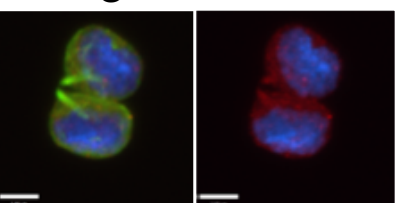

Young ctr; Cdc42 (red), tubulin (green), DAPI (blue);  
exp#2

Image3

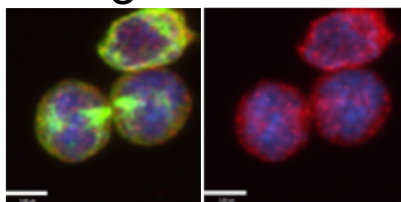

Image5

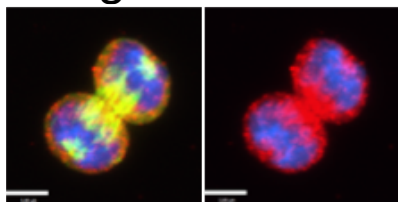

Image7

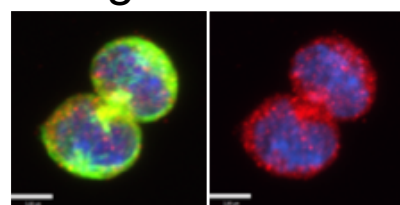

Image9

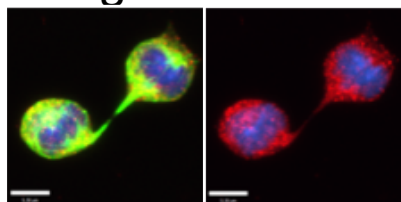

Image15

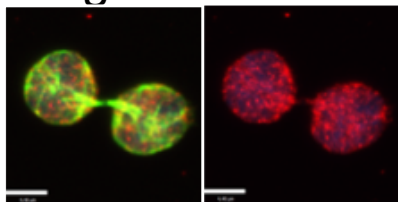

Image17

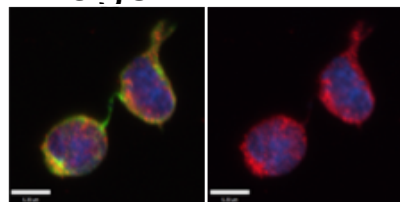

Image19

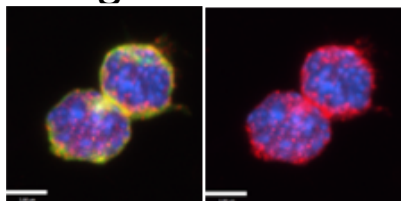

Image21

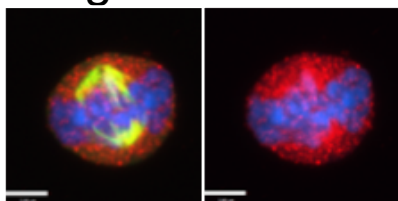

Image23

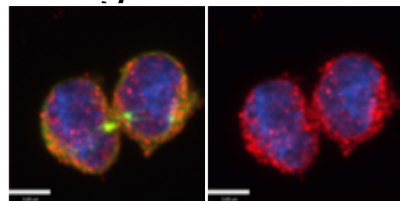

Image27

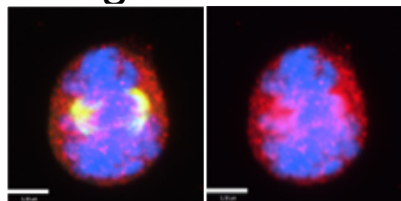

Image29

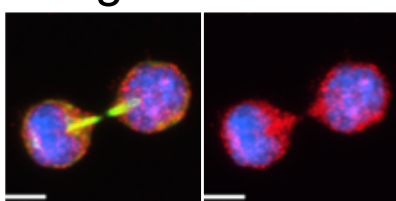

Image33

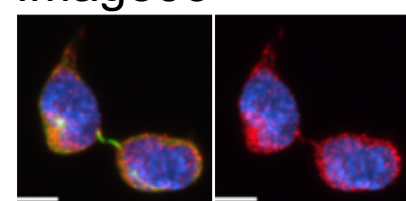

Image13

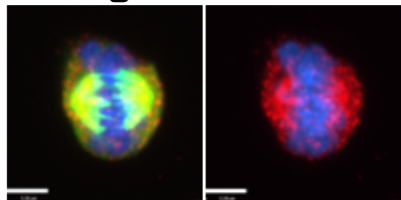

Image35

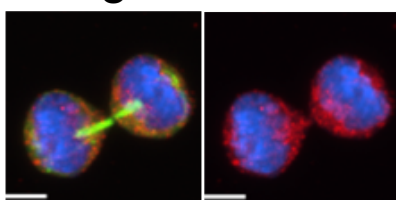

Image37

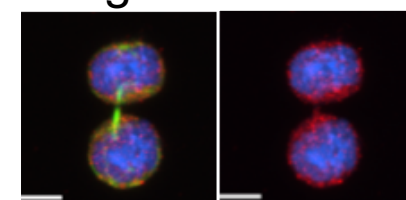

Image11

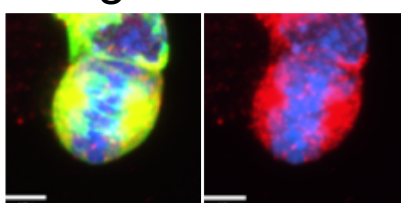

Image39

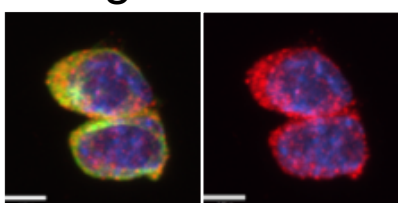

Image41

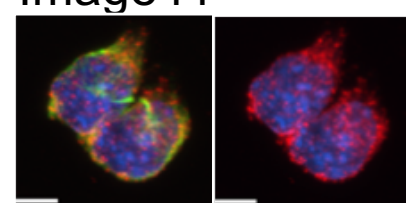

Image45

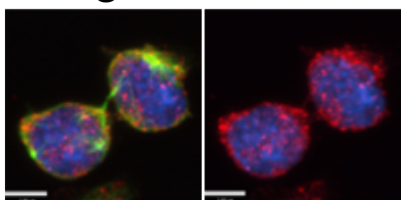

Image47

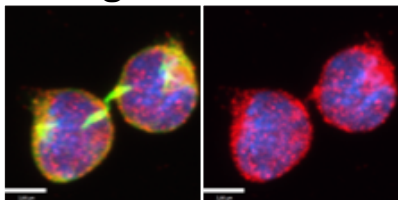

Image49

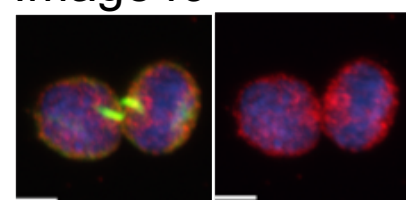

Aged ctr; Cdc42 (red), tubulin (green), DAPI (blue);  
exp#2

Image31

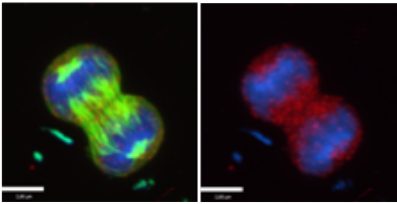

Image33

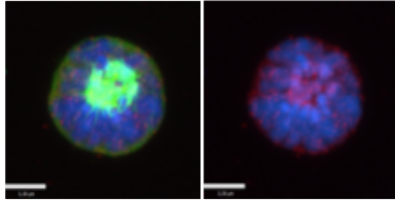

Image37

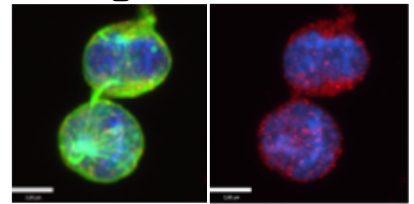

Image39

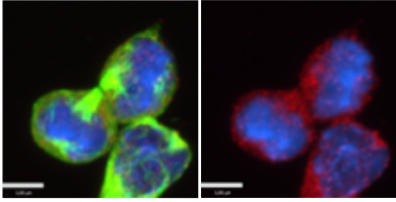

Image41

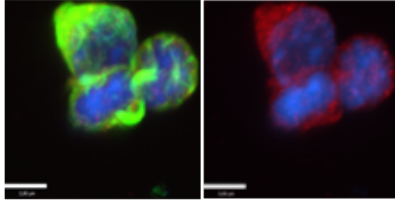

Image45

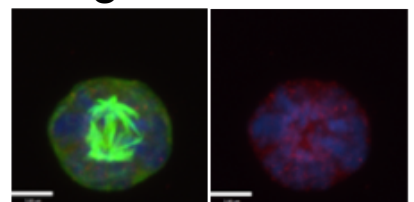

Image47

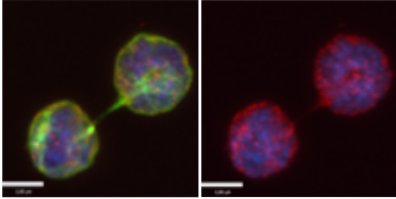

Image49

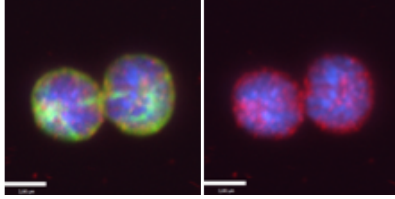

Image53

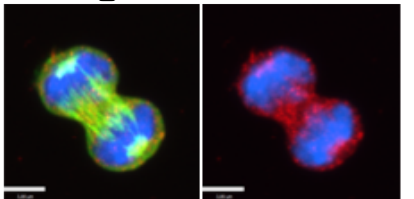

Image57

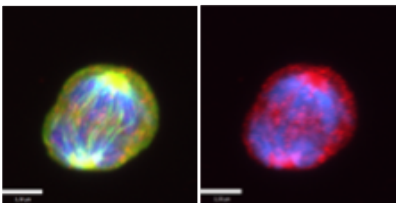

Young+Wnt5a 100ng/ml; Cdc42 (red), tubulin (green), DAPI (blue);  
exp#2

Figure 6 consists of two panels of fluorescence microscopy images. The left panel shows two plant cells expressing GFP-AtNAC108, with green fluorescence visible in the cytoplasm and nucleus. The right panel shows two plant cells expressing GFP-AtNAC109, with red fluorescence visible in the cytoplasm and nucleus. Both panels include a white scale bar in the bottom left corner.

## exp#2
