# Supplementary material
Source: publisher figshare collection journal article supplement (https://plos.figshare.com/articles/dataset/_/7111907)
Supplement: Supplementary file [file 1]

A [3a1]

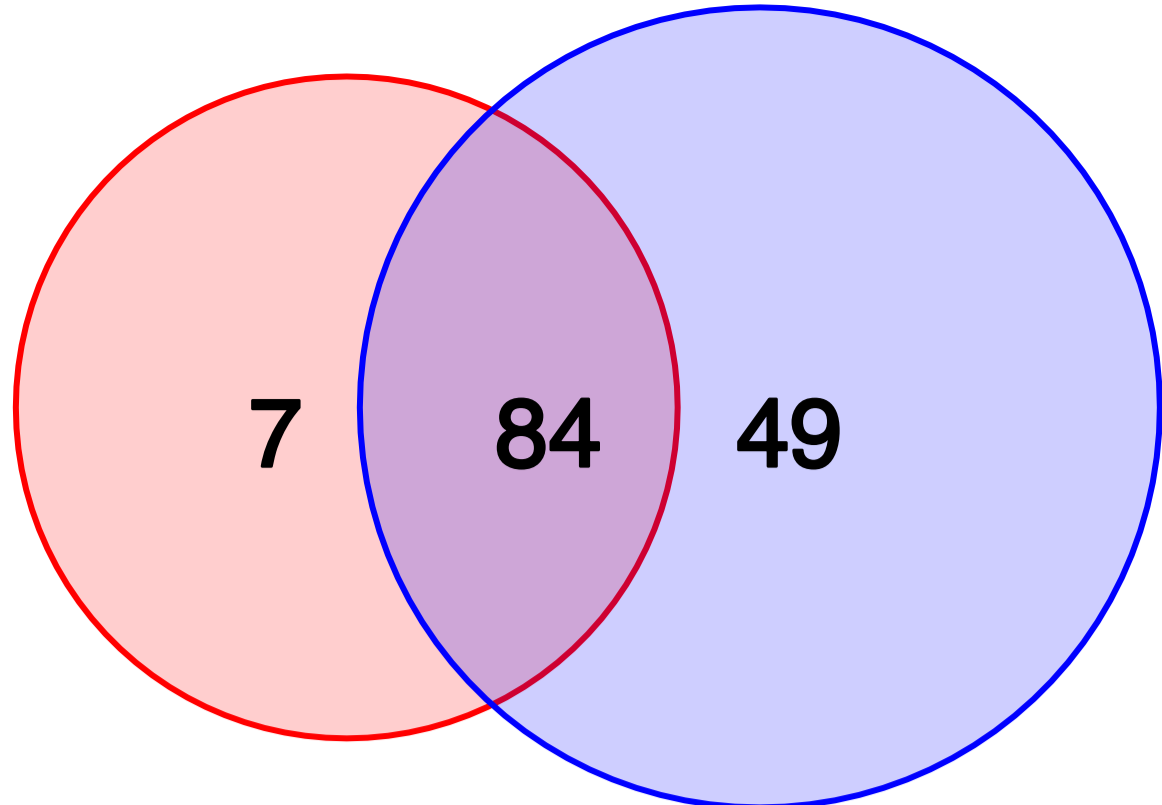

B [3a1]

A [3a2]

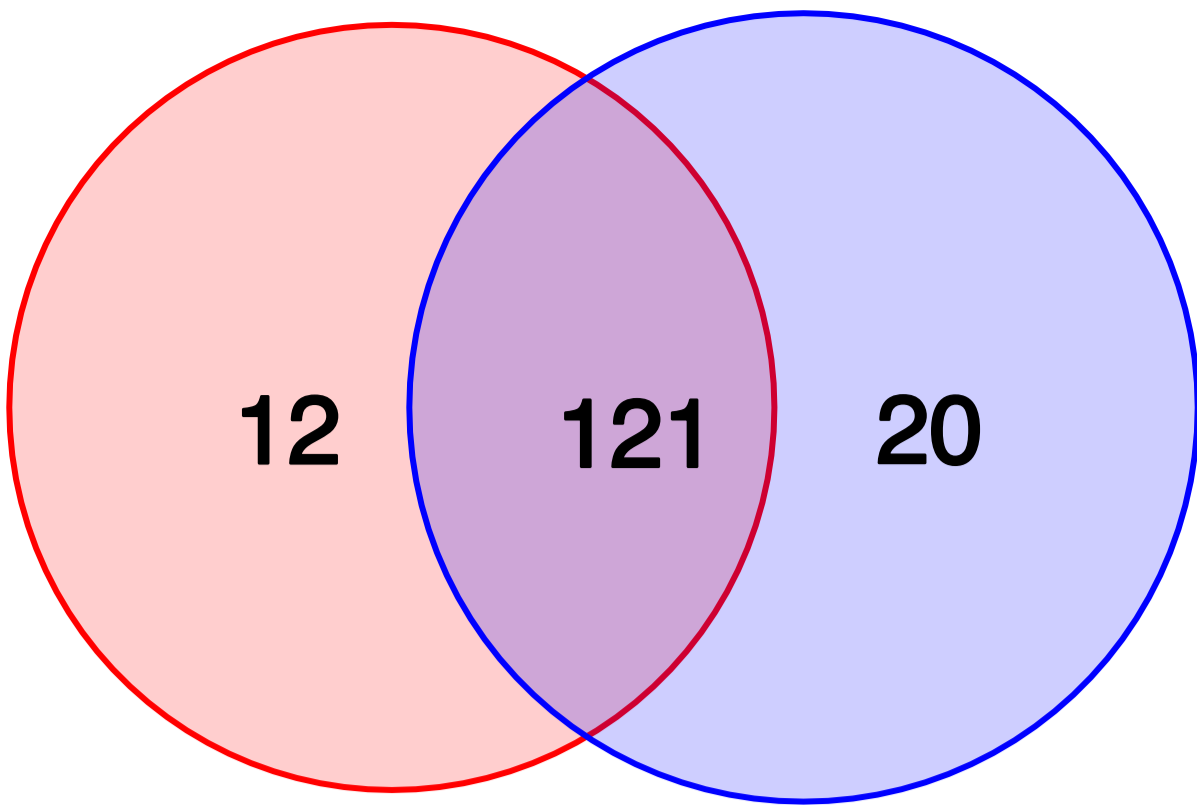

B [3a2]

A [3a3]

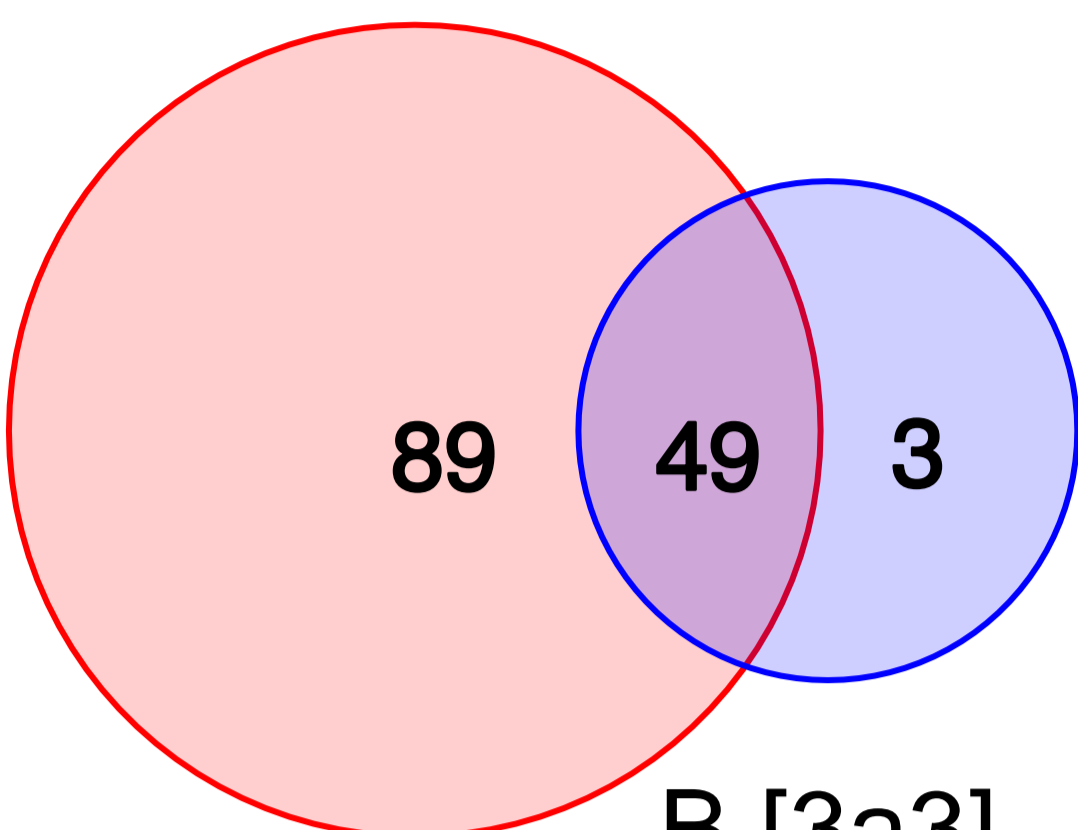

B [3a3]

A [3a4]

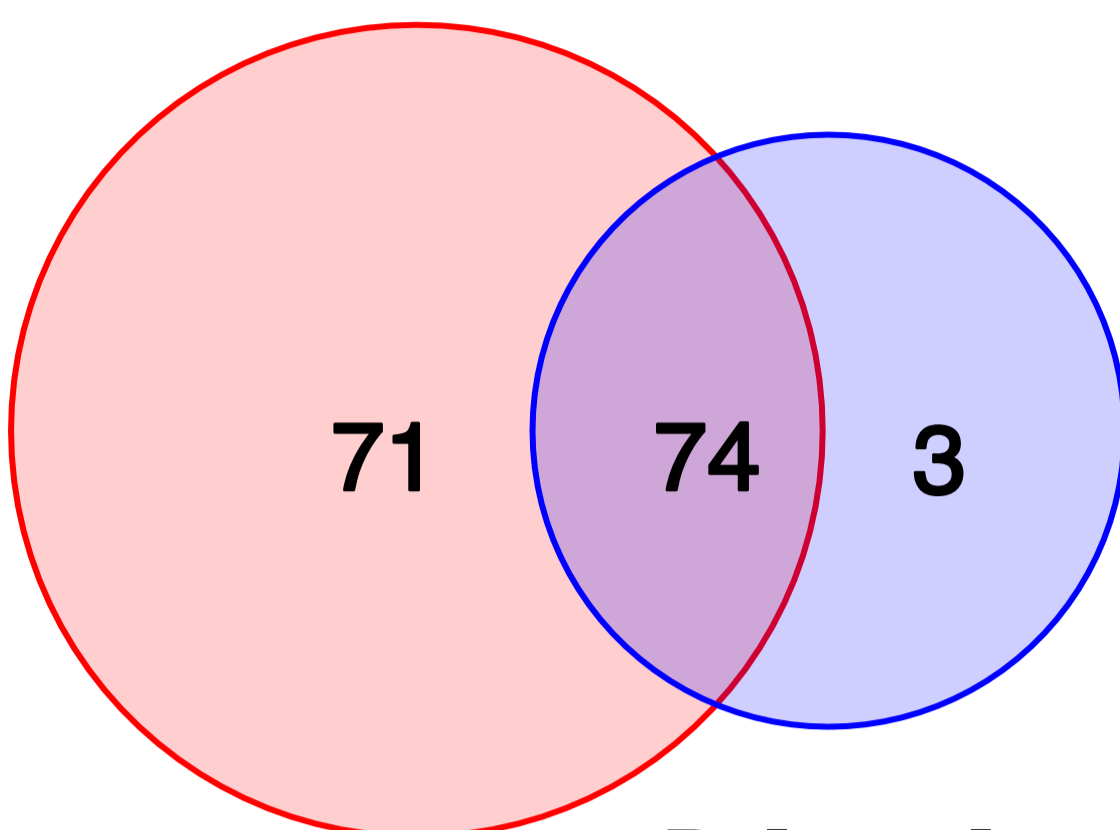

B [3a4]

A [3a5]

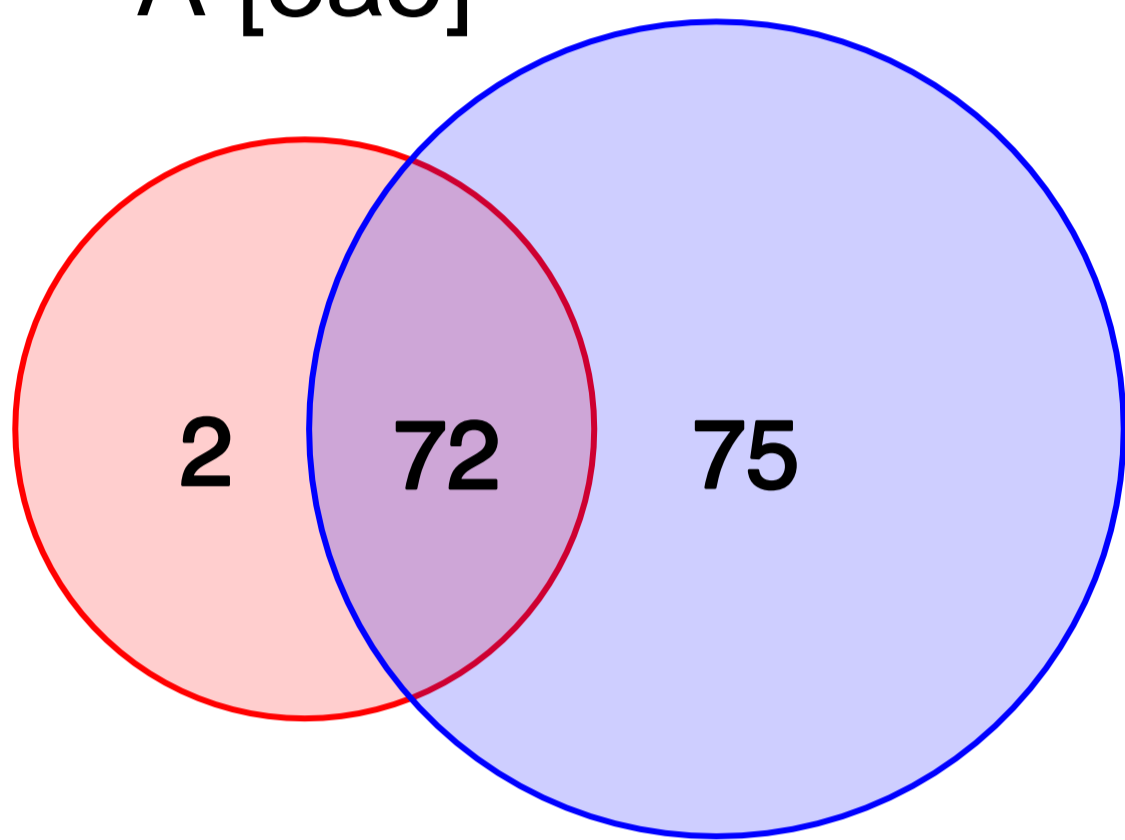

B [3a5]

A [3y2]

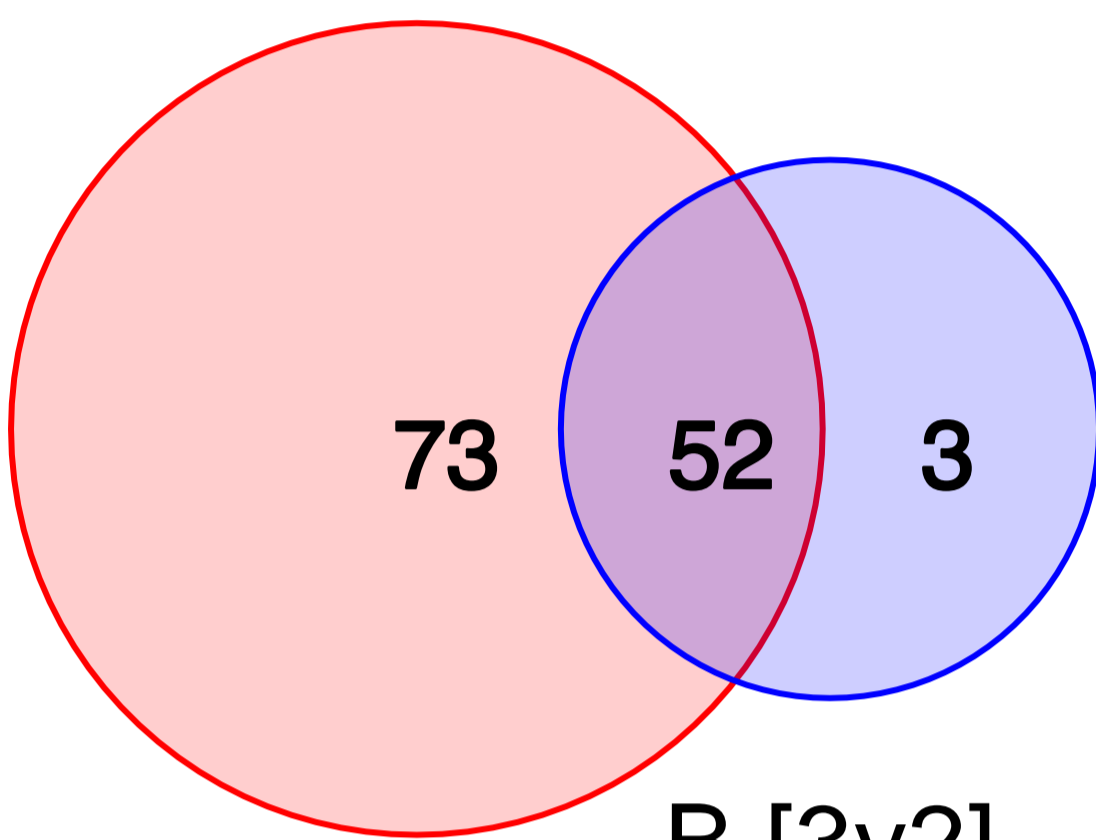

B [3y2]

A [3y3]

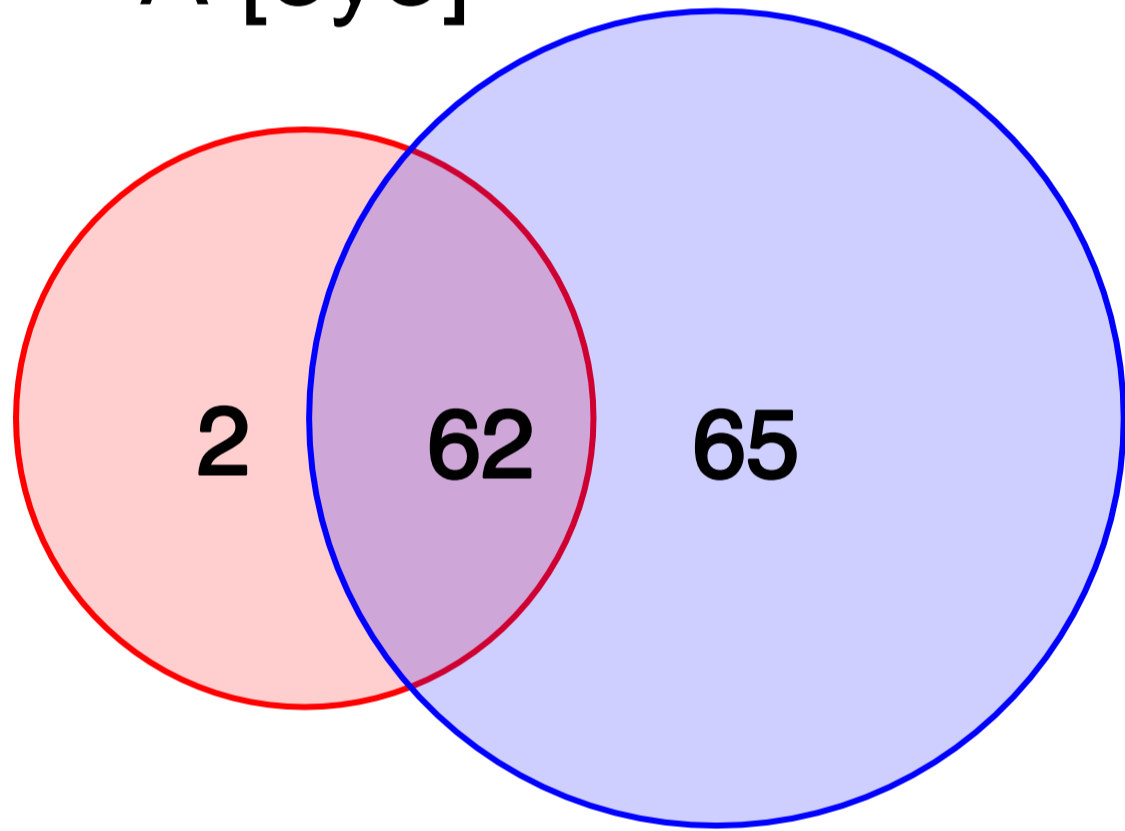

B [3y3]

A [3y4]

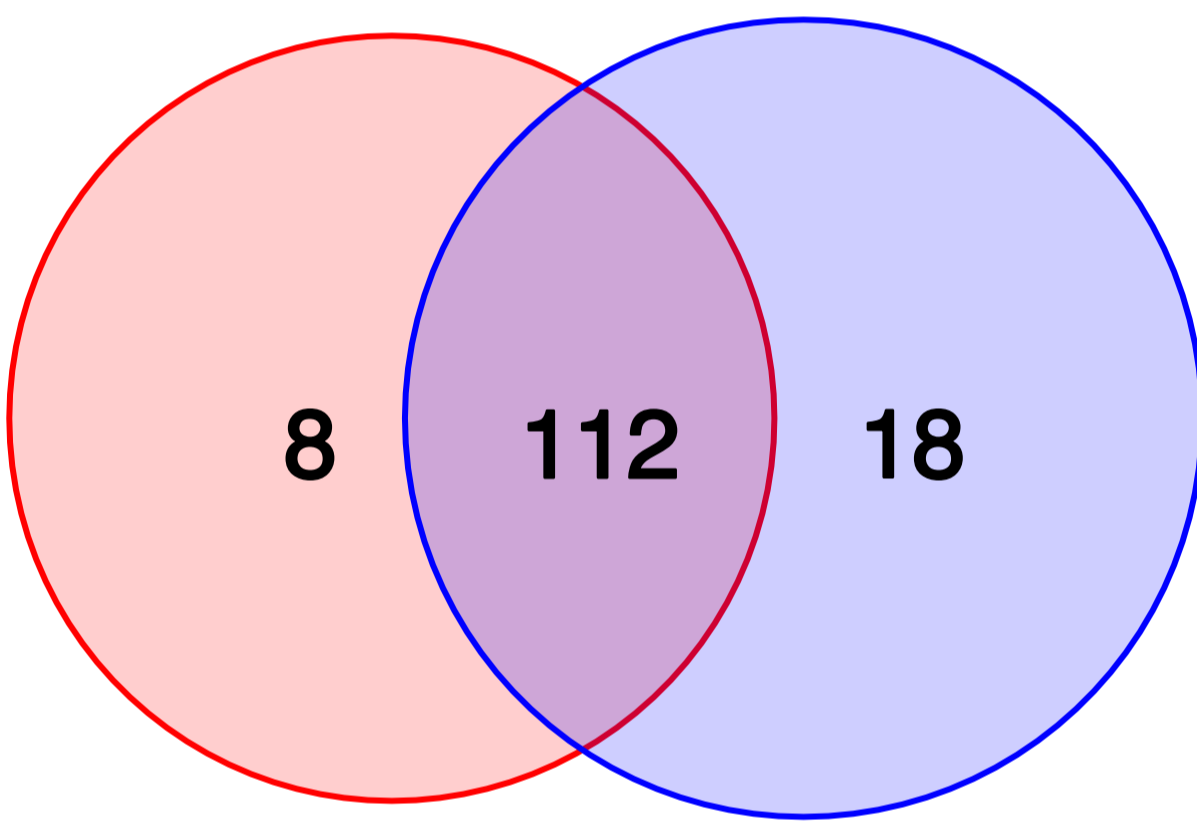

B [3y4]

A [3y6]

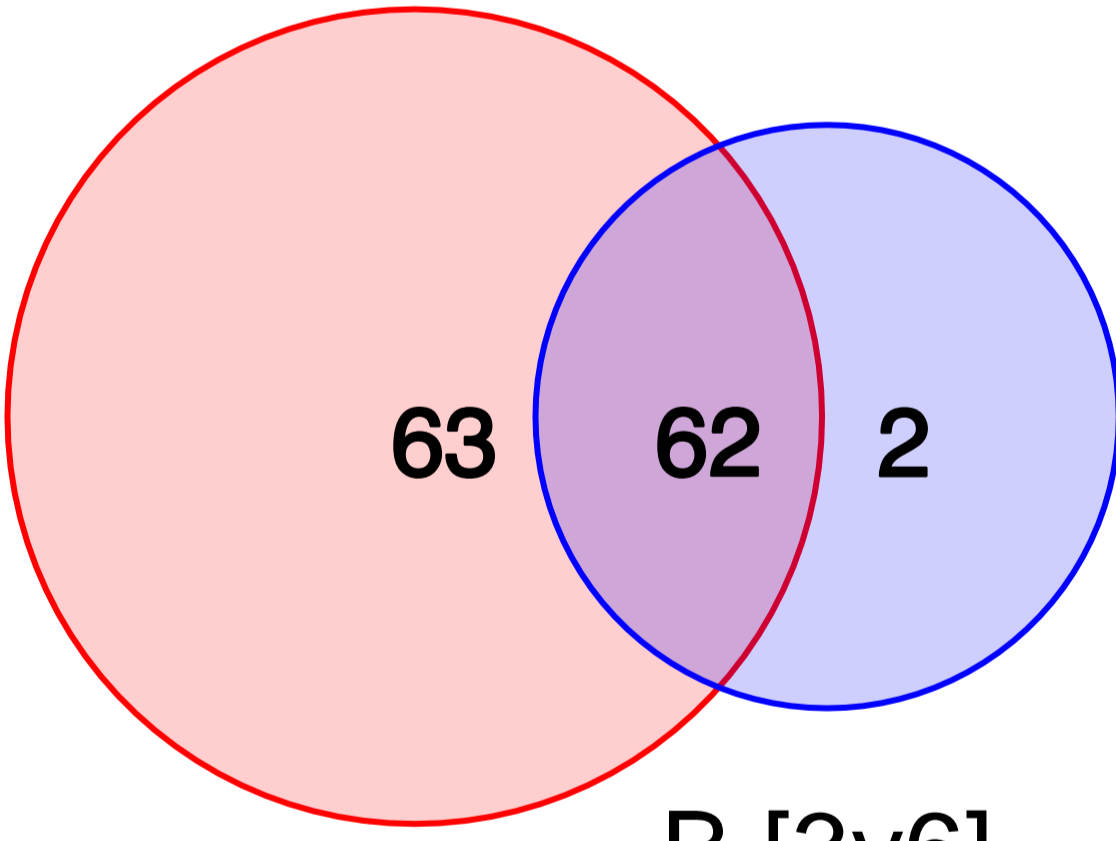

B [3y6]

A [3y7]

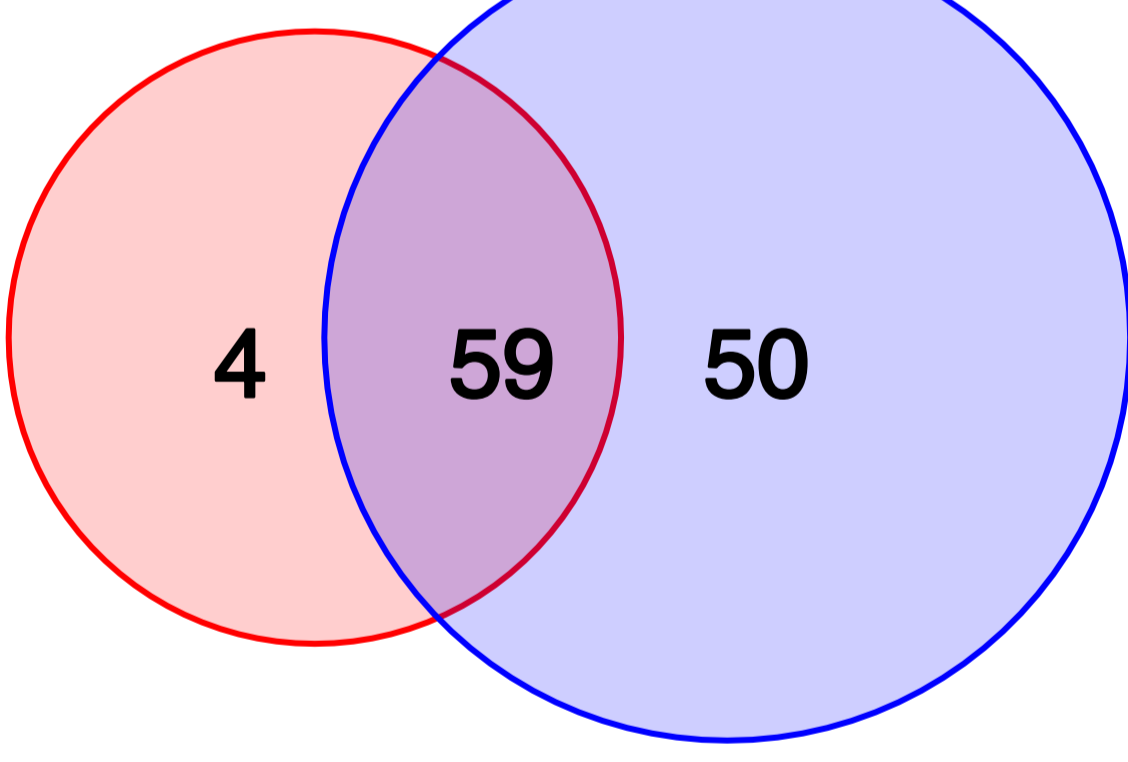

B [3y7]

A [3y8]

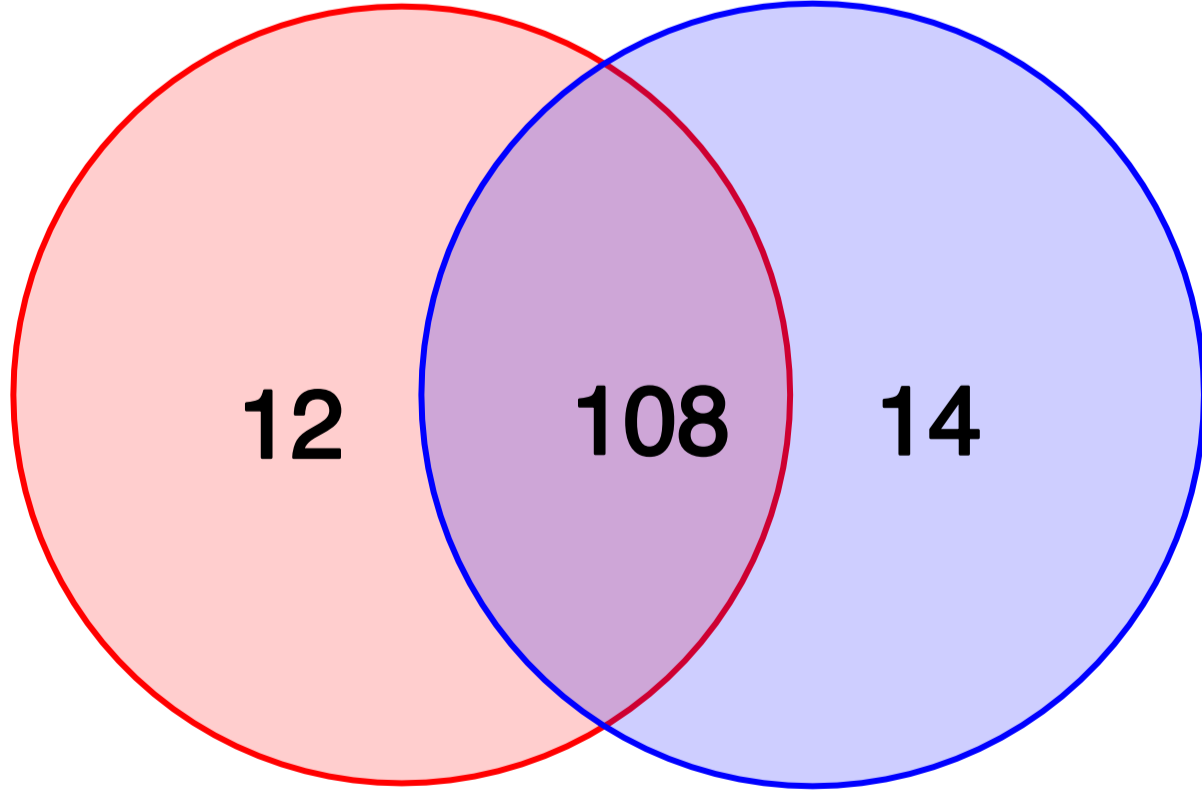

B [3y8]

A [4y1]

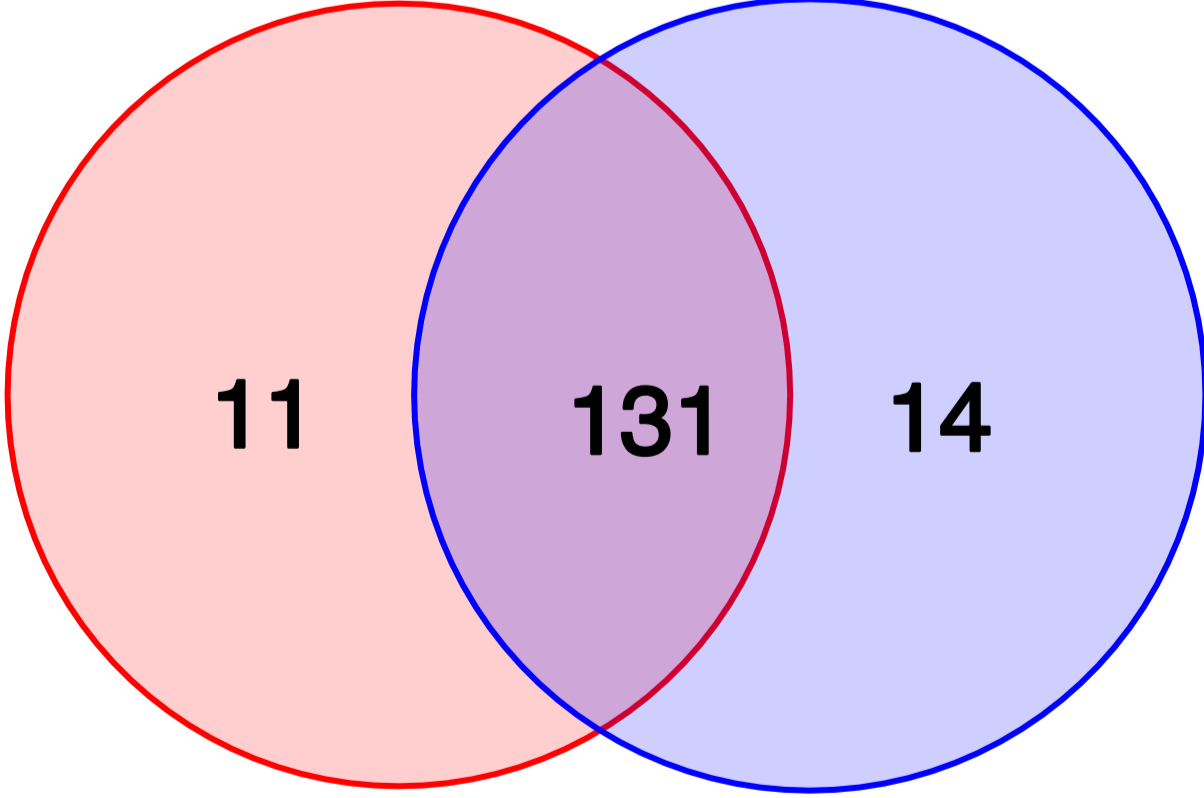

B [4y1]

A [4y5]

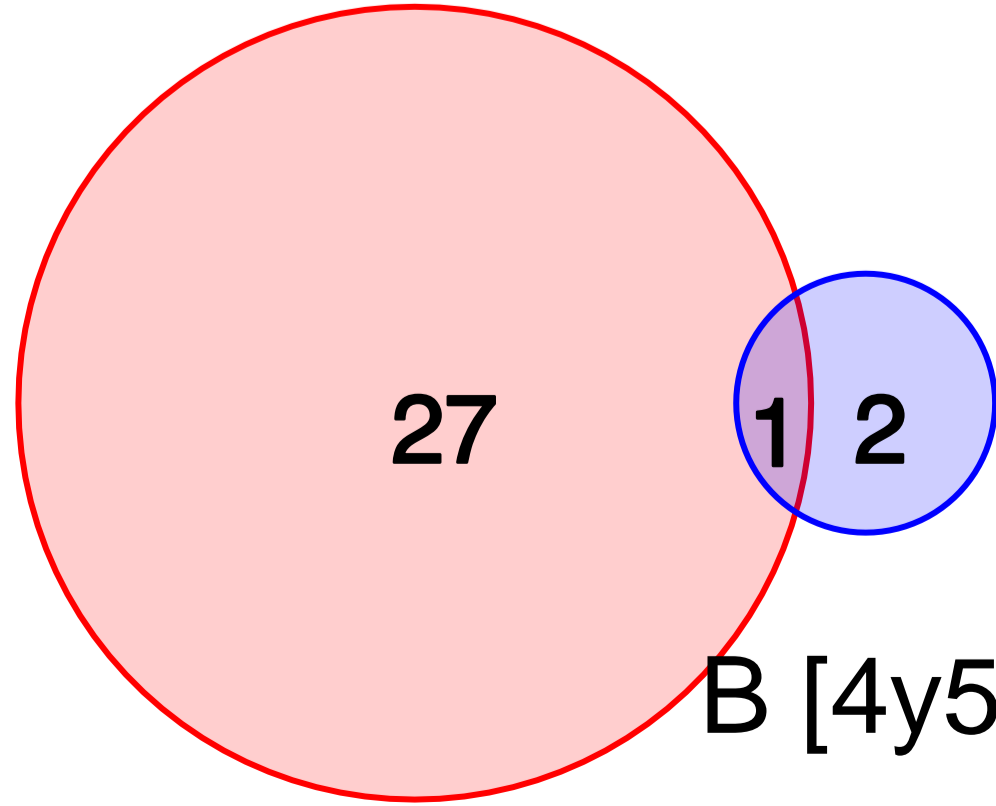

B [4y5]

A [5y6]

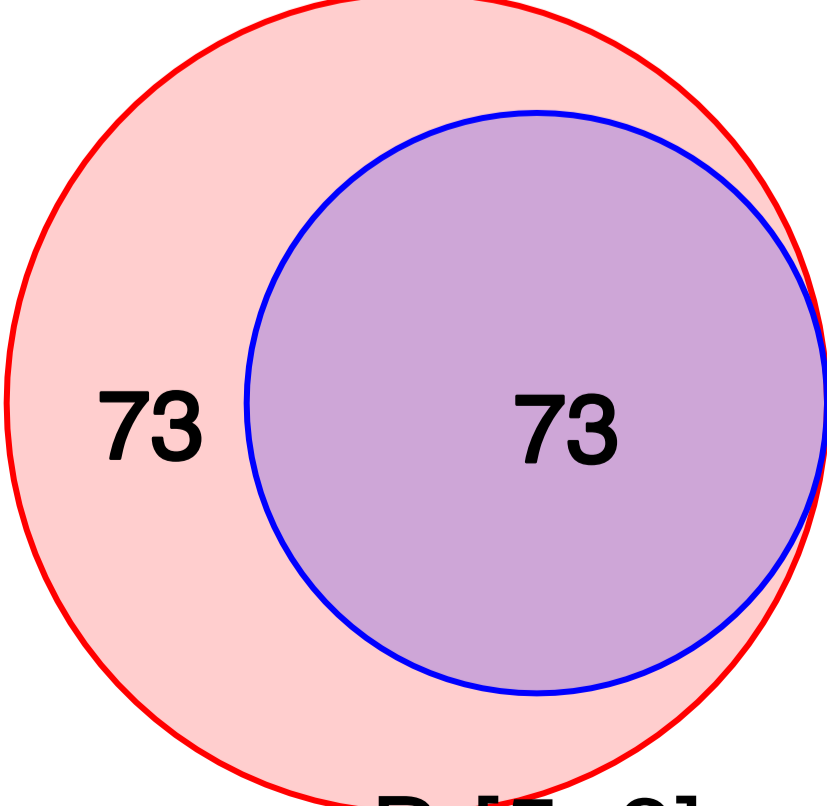

B [5y6]
