# Supplementary material
Source: publisher figshare collection journal article supplement (https://plos.figshare.com/articles/dataset/_/7111907)
Supplement: Supplementary file [file 1]

**S2 Table. Analysis of the divisional outcome** - Single daughter pair transplants outcome for each sample set is shown. DA= daughter A; DB=daughter B. S = cell retrospectively defined as stem cell; P = cell retrospectively defined as progenitor. SymS= symmetric self-renewal; Asym=asymmetric; SymD=symmetric differentiation. n.e.=not engrafted.

| Daughter pair n. | Young+Wnt5a |      |         | Young Ctr |      |         | Aged Ctr |      |         | Aged CASIN |      |         |
|------------------|-------------|------|---------|-----------|------|---------|----------|------|---------|------------|------|---------|
|                  | DA          | DB   | Outcome | DA        | DB   | Outcome | DA       | DB   | Outcome | DA         | DB   | Outcome |
| 1                | S           | S    | SymS    | P         | S    | Asym    | S        | S    | SymS    | P          | S    | Asym    |
| 2                | S           | S    | SymS    | S         | S    | SymS    | S        | S    | SymS    | S          | P    | Asym    |
| 3                | S           | S    | SymS    | S         | P    | Asym    | S        | S    | SymS    | S          | S    | SymS    |
| 4                | P           | S    | Asym    | P         | S    | Asym    | S        | S    | SymS    | n.e.       | n.e. | --      |
| 5                | S           | S    | SymS    | S         | P    | Asym    | S        | S    | SymS    | n.e.       | n.e. | --      |
| 6                | n.e.        | n.e. | --      | S         | S    | SymS    | P        | S    | Asym    | P          | S    | Asym    |
| 7                | n.e.        | n.e. | --      | P         | S    | Asym    | S        | n.e. | --      | P          | S    | Asym    |
| 8                | S           | S    | SymS    | P         | S    | Asym    | n.e.     | P    | --      | S          | P    | Asym    |
| 9                | S           | S    | SymS    | n.e.      | n.e. | --      | P        | S    | Asym    | n.e.       | n.e. | --      |
| 10               | S           | S    | SymS    | P         | S    | Asym    | S        | S    | SymS    | n.e.       | n.e. | --      |
| 11               |             |      |         | S         | S    | SymS    | S        | S    | SymS    | P          | S    | Asym    |
| 12               |             |      |         | S         | P    | Asym    | n.e.     | S    | --      | S          | P    | Asym    |
| 13               |             |      |         | P         | S    | Asym    | P        | S    | Asym    | n.e.       | P    | --      |
| 14               |             |      |         | n.e.      | n.e. | --      | S        | S    | SymS    |            |      |         |
| 15               |             |      |         | n.e.      | S    | --      | P        | P    | SymD    |            |      |         |
| 16               |             |      |         | n.e.      | n.e. | --      | S        | S    | SymS    |            |      |         |
| Total engraft    | 8           | 8    | 8       | 12        | 14   | 12      | 14       | 15   | 13      | 8          | 9    | 8       |
| Efficiency pair  |             |      | 80%     |           |      | 75%     |          |      | 81.25%  |            |      | 61.5%   |
