# Supplementary material
Source: publisher figshare collection journal article supplement (https://plos.figshare.com/articles/dataset/_/7111907)
Supplement: Supplementary file [file 1]

**S3 Table. Analysis of frequency of reconstitution** – For each single sample set the number and frequency of single and pair wise mice is listed. The p value refers to the Chi-square test based on the symmetric and asymmetric divisional outcomes.

|                    | Mice reconstituted | Frequency | Mice reconstituted Pairs | Frequency pairs | Symmetric outcome | Asymmetric outcome | p value (Chi-square vs Young Ctr) | p value (Chi-square vs Aged Ctr) |
|--------------------|--------------------|-----------|--------------------------|-----------------|-------------------|--------------------|-----------------------------------|----------------------------------|
| <b>Young Ctr</b>   | 26/32              | 81.25%    | 12/16                    | 75%             | 3/12 (25%)        | 9/12 (75%)         | ---                               | 0.0094                           |
| <b>Aged Ctr</b>    | 29/32              | 90.6%     | 13/16                    | 81.25%          | 10/13 (76.9%)     | 3/13 (23.1%)       | 0.0094                            | ---                              |
| <b>Aged+CASIN</b>  | 17/26              | 65.4%     | 8/13                     | 61.5%           | 1/8 (12.5%)       | 7/8 (87.5%)        | 0.4936                            | 0.0041                           |
| <b>Young+Wnt5a</b> | 16/20              | 80.0%     | 8/10                     | 80%             | 7/8 (87.5%)       | 1/8 (12.5%)        | 0.0062                            | 0.5489                           |
| <b>Total</b>       | 88/110             | 80.0%     | 40/55                    | 72.7%           |                   |                    |                                   |                                  |
